# Supplementary material
Source: PubMed Central journal article supplement (PMC10879933)
Supplement: NIHMS1618898-supplement-1.pdf [file NIHMS1618898-supplement-1.pdf]

# **The multifunctional dopamine D2/D3 receptor agonists also possess inhibitory activity against the full-length tau441 protein aggregation**

Iva Ziu,<sup>1</sup> Irving Rettig,<sup>2</sup> Dan Luo,<sup>3</sup> Alope K. Dutta,<sup>3</sup> Theresa M. McCormick,<sup>2</sup> Colin Wu,<sup>1</sup> and Sanela Martic-Milne\*<sup>4</sup>

<sup>1</sup>*Department of Chemistry, Oakland University, Rochester, MI, 48309, USA*

<sup>2</sup>*Department of Chemistry, Portland State University, Portland, Oregon, 97201, USA,*

<sup>3</sup>*Department of Pharmaceutical Sciences, Eugene Applebaum College of Pharmacy and Health Sciences, Wayne State University, Detroit, MI, 48201, USA*

<sup>4</sup>*Department of Forensic Science, Environmental and Life Sciences, Trent University, Peterborough, ON, K9J 0G2, Canada*

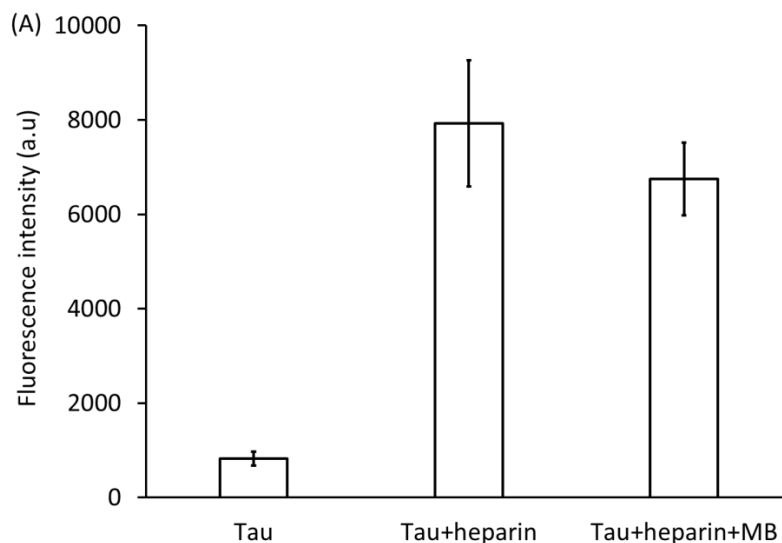

**Figure S1.** Proteostat aggregation assay. A bar graph showing the average fluorescence intensity after 72 hours of incubation of the samples at 37 °C. a) tau protein in buffer, b) aggregated tau with heparin in buffer, c) aggregated tau with heparin in the presence of MB (final concentration 5  $\mu$ M).  $\lambda_{Ex}$ = 550 nm,  $\lambda_{Em}$ = 600 nm.

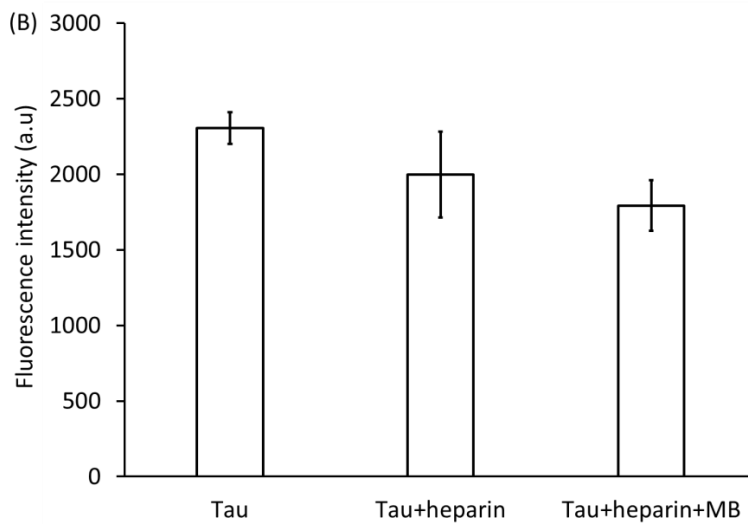

**Figure S2.** Average fluorescence emission spectra of Bis-ANS-bound samples after 72 hours of incubation of the samples at 37 °C. a) tau protein in buffer, b) aggregated tau with heparin in buffer, c) aggregated tau with heparin in the presence of MB (final concentration 5  $\mu$ M).  $\lambda_{Ex}$ = 350 nm,  $\lambda_{Em}$ = 510 nm.

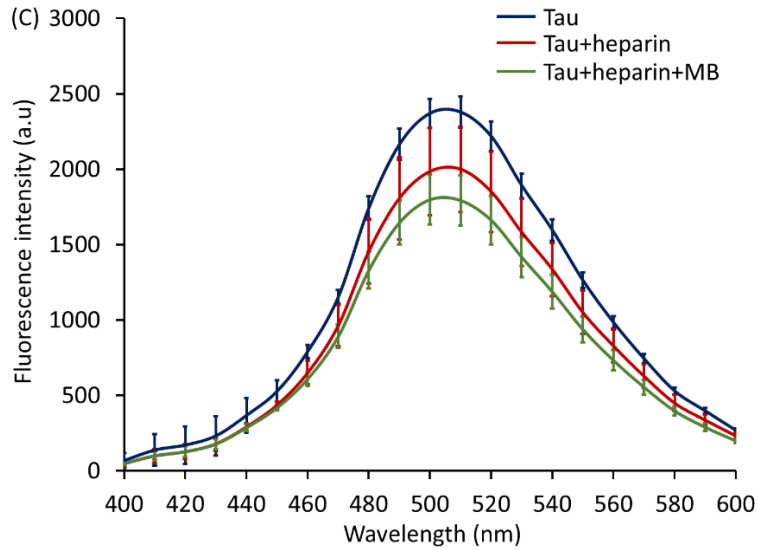

**Figure S3.** Average fluorescence emission spectra of Bis-ANS-bound samples after 72 hours of incubation of the samples at 37 °C. Blue) tau protein in buffer, red) aggregated tau with heparin in buffer, green) aggregated tau with heparin in the presence of MB (final concentration 5  $\mu$ M).  $\lambda_{Ex}$ = 350 nm,  $\lambda_{Em}$ = 400-600 nm.

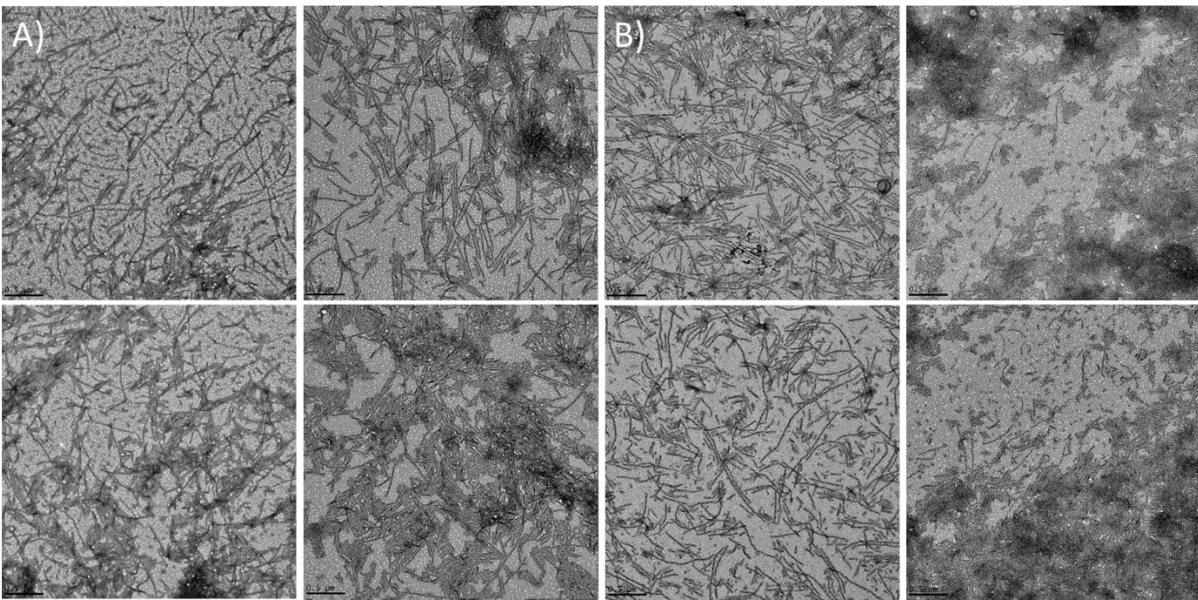

**Figure S4.** TEM images of tau protein samples incubated for 72 hours at 37 °C. A) aggregated tau with heparin, B) aggregated tau with heparin and MB (final concentration 5  $\mu$ M). Magnification 22000x, scale bar 500 nm.

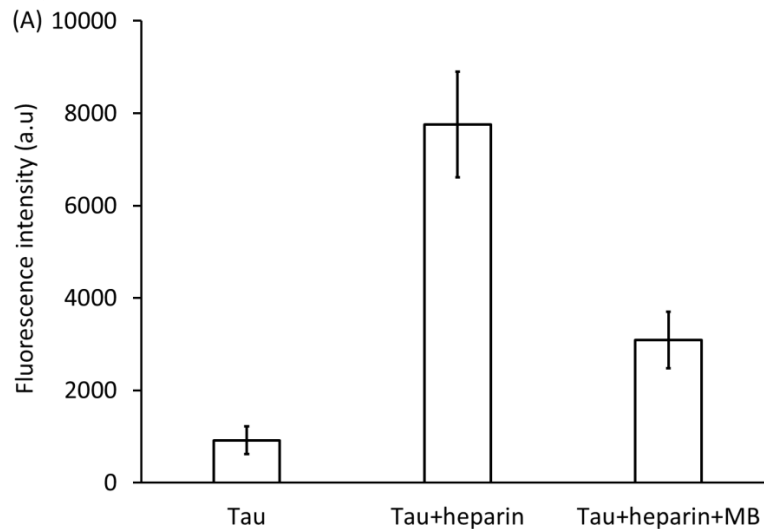

**Figure S5.** Proteostat aggregation assay. A bar graph showing the average fluorescence intensity after 72 hours of incubation of the samples at 37 °C. a) tau protein in buffer, b) aggregated tau with heparin in buffer, c) aggregated tau with heparin in the presence of MB (final concentration 40  $\mu$ M).  $\lambda_{Ex}$ = 550 nm,  $\lambda_{Em}$ = 600 nm.

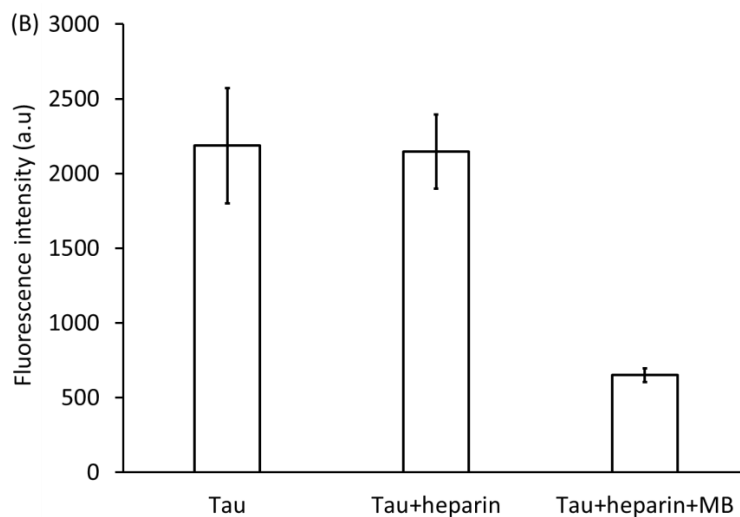

**Figure S6.** Average fluorescence emission spectra of Bis-ANS-bound samples after 72 hours of incubation of the samples at 37 °C. a) tau protein in buffer, b) aggregated tau with heparin in buffer, c) aggregated tau with heparin in the presence of MB (final concentration 40  $\mu$ M).  $\lambda_{Ex}$ = 350 nm,  $\lambda_{Em}$ = 510 nm.



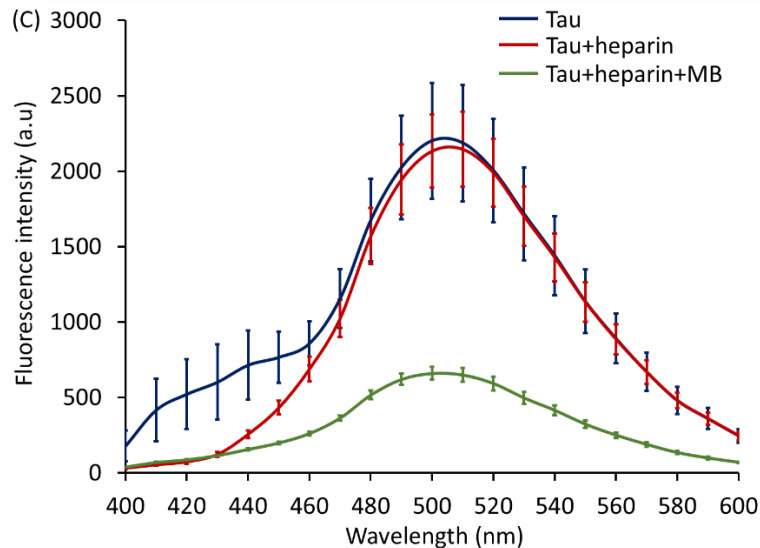

**Figure S7.** Average fluorescence emission spectra of Bis-ANS-bound samples after 72 hours of incubation of the samples at 37 °C. Blue) tau protein in buffer, red) aggregated tau with heparin in buffer, green) aggregated tau with heparin in the presence of MB (final concentration 40  $\mu$ M).  $\lambda_{\text{EX}} = 350$  nm,  $\lambda_{\text{Em}} = 400$ -600 nm.

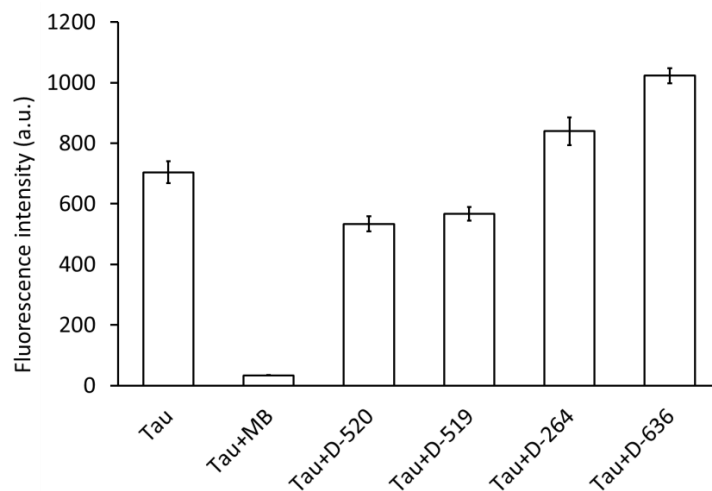

**Figure S8.** Average fluorescence emission spectra of Bis-ANS-bound samples, in the absence of heparin, after 1 hour of incubation of the samples at 37 °C. a) tau protein in buffer, b) tau protein in buffer and MB, c) tau protein in buffer and D-520, d) tau protein in buffer and D-519, e) tau protein in buffer and D-264, f) tau protein in buffer and D-636. Final concentration of all compounds 120  $\mu$ M.  $\lambda_{\text{EX}} = 350$  nm,  $\lambda_{\text{Em}} = 510$  nm

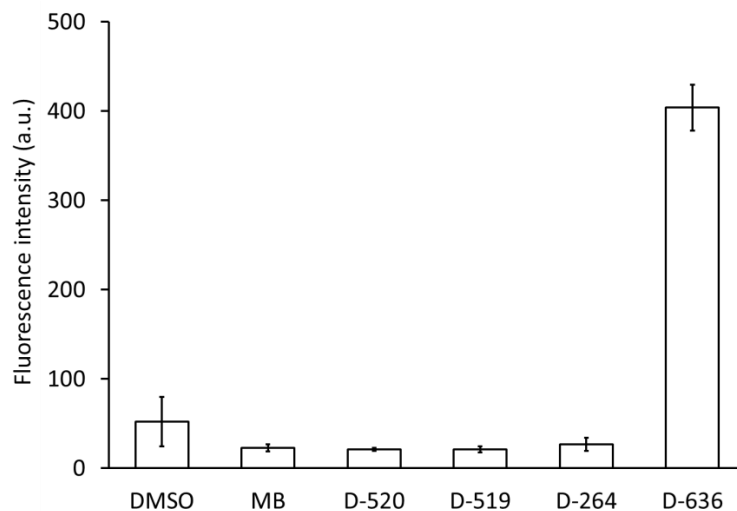

**Figure S9.** Average fluorescence emission spectra of Bis-ANS-bound samples in the absence of tau or heparin. a) DMSO in tau buffer, b) MB in tau buffer, c) D-520 in tau buffer, d) D-519 in tau buffer, e) D-264 in tau buffer, f) D-636 in tau buffer. Final concentration of all compounds 120  $\mu$ M.  $\lambda_{Ex}$ = 350 nm,  $\lambda_{Em}$ = 510 nm

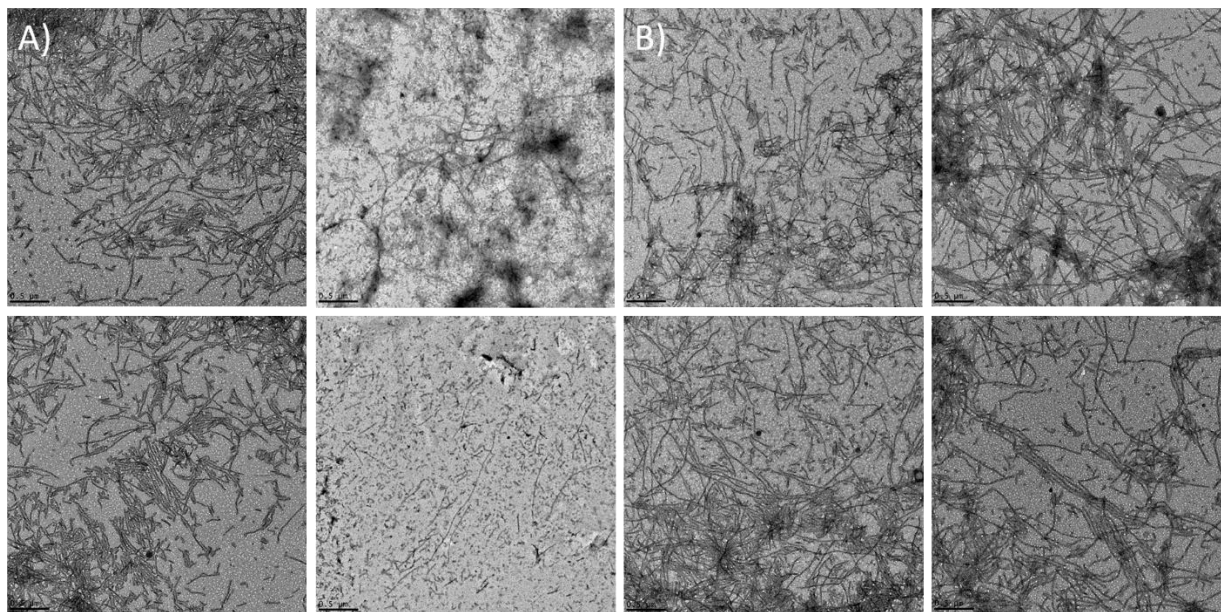

**Figure S10.** TEM images of tau protein samples incubated for 72 hours at 37 °C. A) aggregated tau with heparin, B) aggregated tau with heparin and MB (final concentration 40  $\mu$ M). Magnification 22000x, scale bar 500 nm.

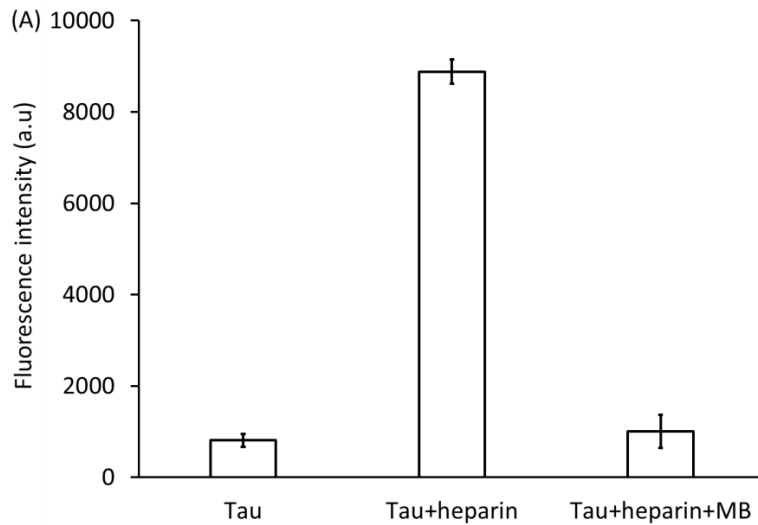

**Figure S11.** Proteostat aggregation assay. A bar graph showing the average fluorescence intensity after 72 hours of incubation of the samples at 37 °C. a) tau protein in buffer, b) aggregated tau with heparin in buffer, c) aggregated tau with heparin in the presence of MB (final concentration 120  $\mu$ M).  $\lambda_{Ex}$ = 550 nm,  $\lambda_{Em}$ = 600 nm.

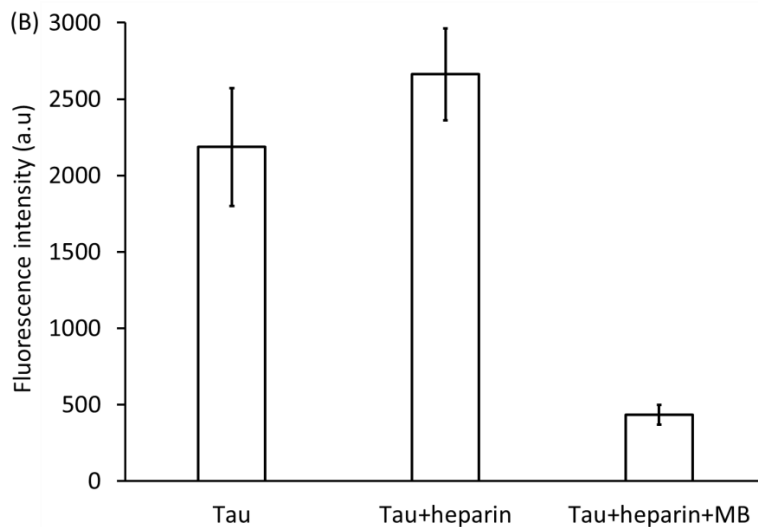

**Figure S12.** Average fluorescence emission spectra of Bis-ANS-bound samples after 72 hours of incubation of the samples at 37 °C. a) tau protein in buffer, b) aggregated tau with heparin in buffer, c) aggregated tau with heparin in the presence of MB (final concentration 120  $\mu$ M).  $\lambda_{Ex}$ = 350 nm,  $\lambda_{Em}$ = 510 nm.

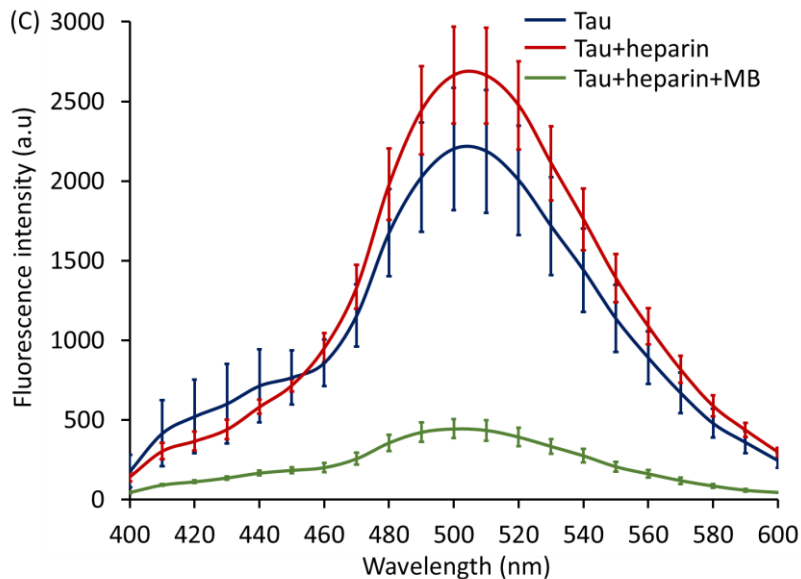

**Figure S13.** Average fluorescence emission spectra of Bis-ANS-bound samples after 72 hours of incubation of the samples at 37 °C. Blue) tau protein in buffer, red) aggregated tau with heparin in buffer, green) aggregated tau with heparin in the presence of MB (final concentration 120  $\mu$ M).  $\lambda_{Ex}$ = 350 nm,  $\lambda_{Em}$ = 400-600 nm.

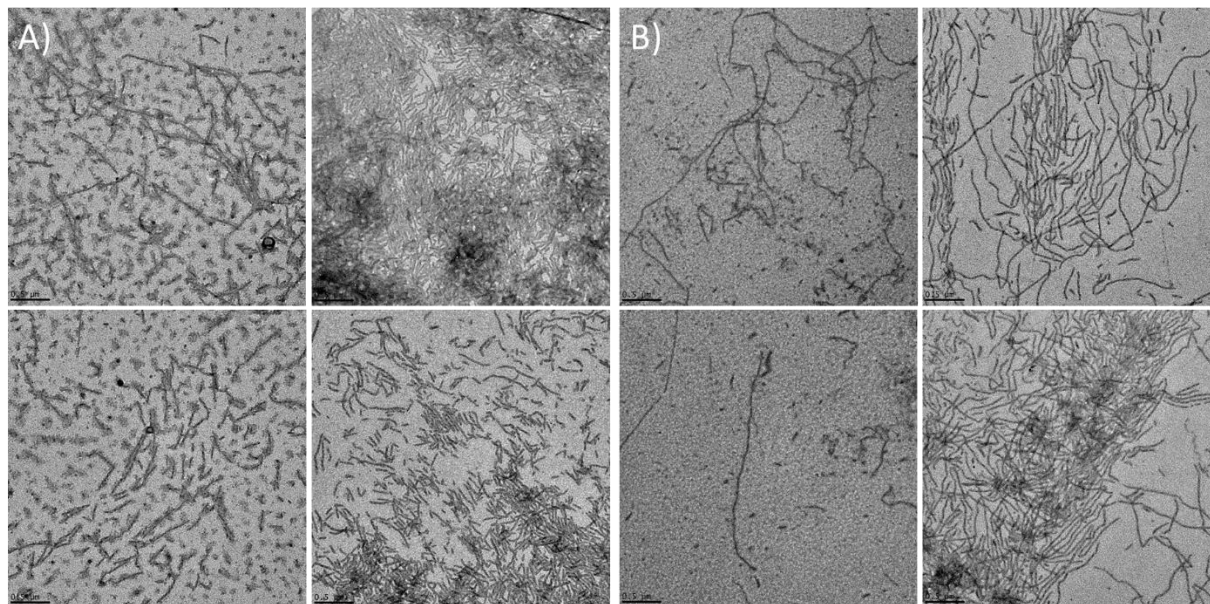

**Figure S14.** TEM images of tau protein samples incubated for 72 hours at 37 °C. A) aggregated tau with heparin, B) aggregated tau with heparin and MB (final concentration 120  $\mu$ M). Magnification 22000x, scale bar 500 nm.

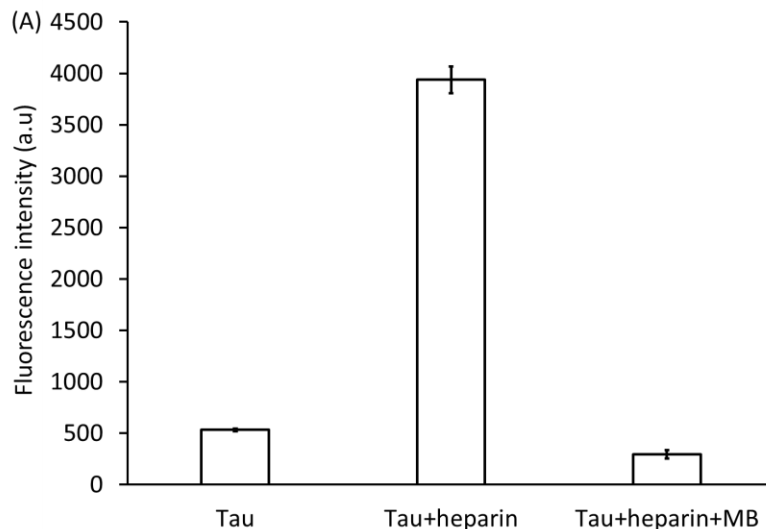

**Figure S15.** Proteostat aggregation assay. A bar graph showing the average fluorescence intensity after 72 hours of incubation of the samples at 37 °C. a) tau protein in buffer, b) aggregated tau with heparin in buffer, c) aggregated tau with heparin in the presence of MB (final concentration 250  $\mu$ M).  $\lambda_{Ex}$ = 550 nm,  $\lambda_{Em}$ = 600 nm.

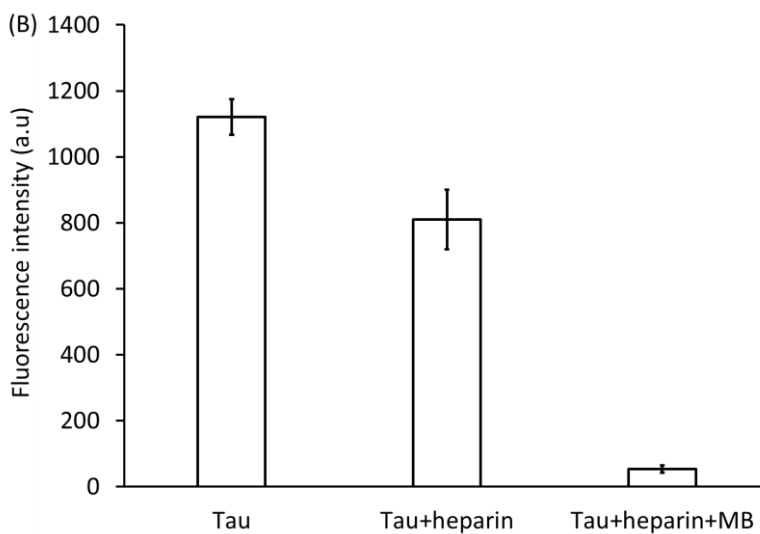

**Figure S16.** Average fluorescence emission spectra of Bis-ANS-bound samples after 72 hours of incubation of the samples at 37 °C. a) tau protein in buffer, b) aggregated tau with heparin in buffer, c) aggregated tau with heparin in the presence of MB (final concentration 250  $\mu$ M).  $\lambda_{Ex}$ = 350 nm,  $\lambda_{Em}$ = 510 nm.



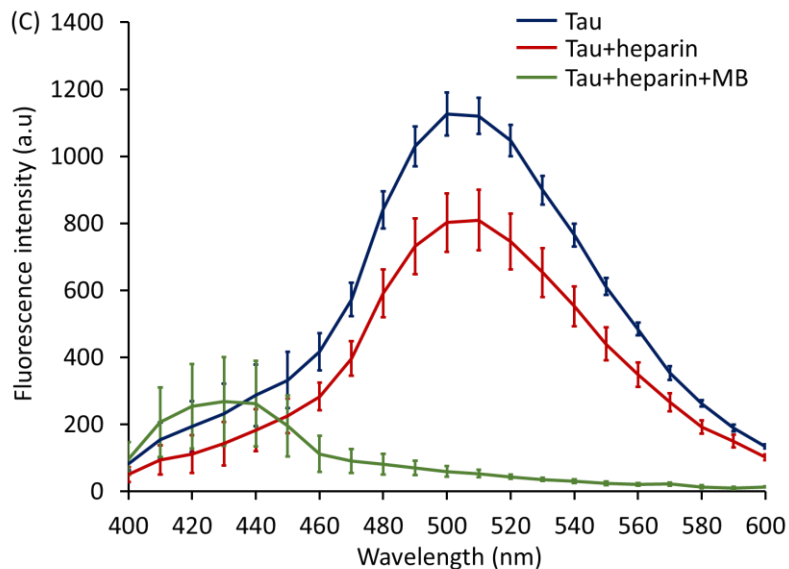

**Figure S17.** Average fluorescence emission spectra of Bis-ANS-bound samples after 72 hours of incubation of the samples at 37 °C. Blue) tau protein in buffer, red) aggregated tau with heparin in buffer, green) aggregated tau with heparin in the presence of MB (final concentration 250  $\mu$ M).  $\lambda_{Ex}$ = 350 nm,  $\lambda_{Em}$ = 400-600 nm.

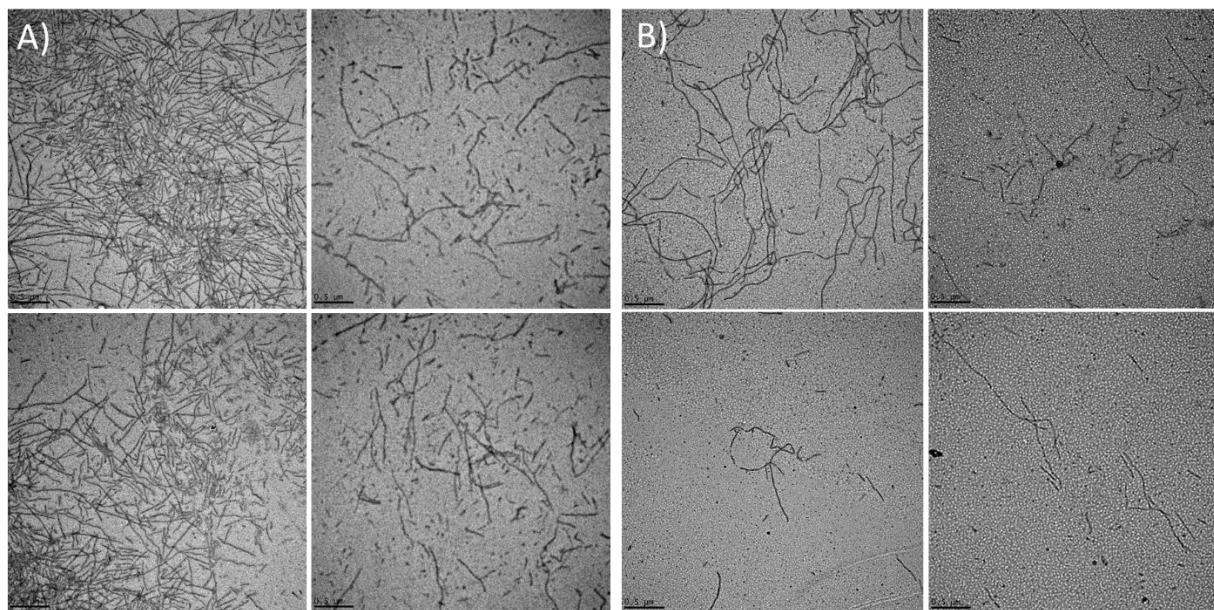

**Figure S18.** TEM images of tau protein samples incubated for 72 hours at 37 °C. A) aggregated tau with heparin, B) aggregated tau with heparin and MB (final concentration 250  $\mu$ M). Magnification 22000x, scale bar 500 nm.

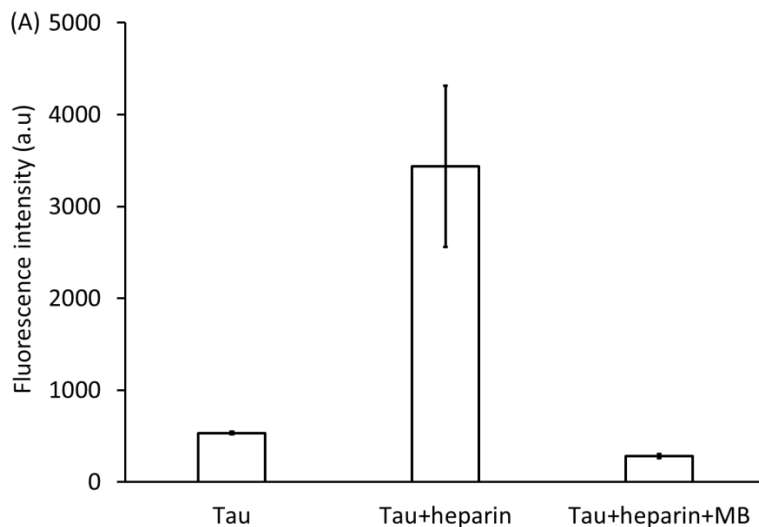

**Figure S19.** Proteostat aggregation assay. A bar graph showing the average fluorescence intensity after 144 hours of incubation of the samples at 37 °C. a) tau protein in buffer, b) aggregated tau with heparin in buffer, c) pre-aggregated tau with heparin for 72 hours, then incubated in the presence of MB (final concentration 120  $\mu$ M) for 72 more hours.  $\lambda_{Ex}$ = 550 nm,  $\lambda_{Em}$ = 600 nm.

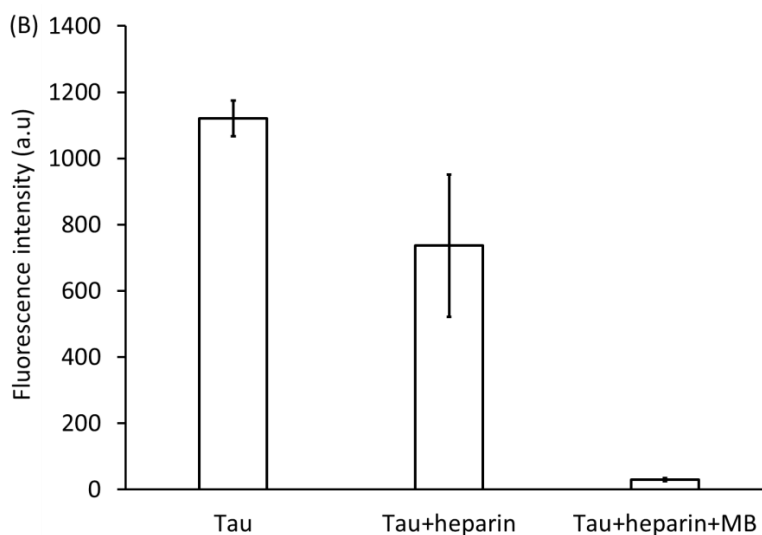

**Figure S20.** Average fluorescence emission spectra of Bis-ANS-bound samples after 144 hours of incubation of the samples at 37 °C. a) tau protein in buffer, b) aggregated tau with heparin in buffer, c) pre-aggregated tau with heparin for 72 hours, then incubated in the presence of MB (final concentration 120  $\mu$ M) for 72 more hours.  $\lambda_{Ex}$ = 350 nm,  $\lambda_{Em}$ = 510 nm.

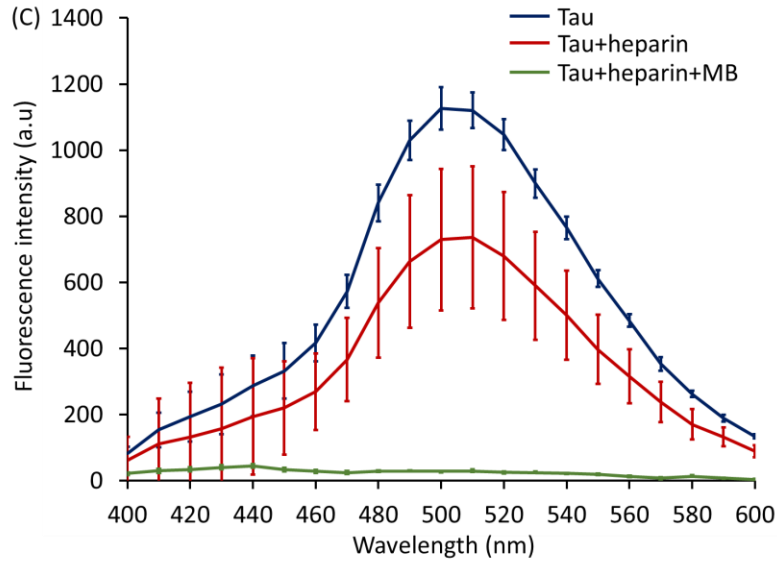

**Figure S21.** Average fluorescence emission spectra of Bis-ANS-bound samples after 144 hours of incubation of the samples at 37 °C. Blue) tau protein in buffer, red) aggregated tau with heparin in buffer, green) pre-aggregated tau with heparin for 72 hours, then incubated in the presence of MB (final concentration 120  $\mu$ M) for 72 more hours.  $\lambda_{Ex}$ = 350 nm,  $\lambda_{Em}$ = 400-600 nm.

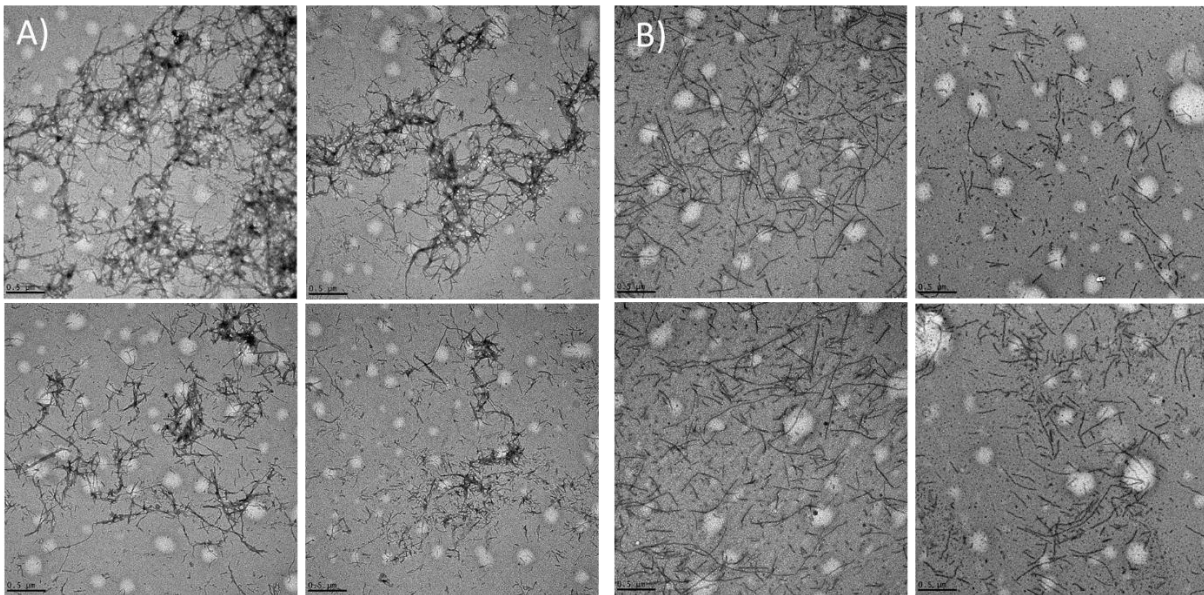

**Figure S22.** TEM images of tau protein samples incubated for 144 hours at 37 °C. A) aggregated tau with heparin, B) pre-aggregated tau with heparin for 72 hours, then incubated with MB (final concentration 120  $\mu$ M) for 72 more hours. Magnification 22000x, scale bar 500 nm.



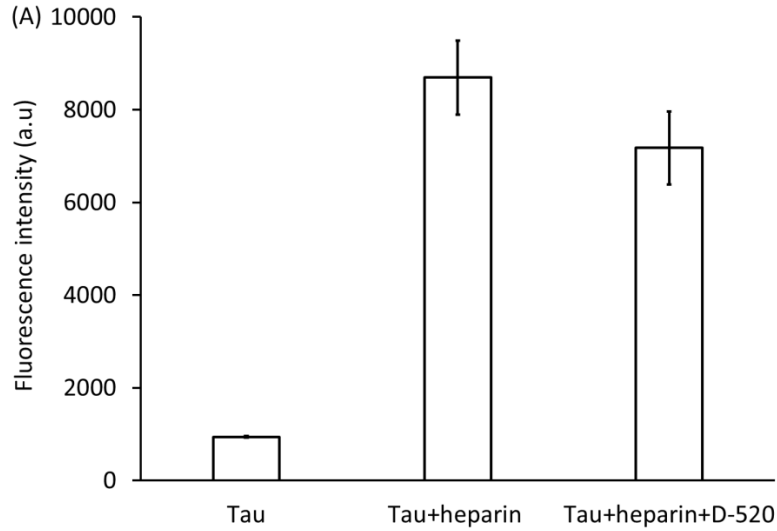

**Figure S23.** Proteostat aggregation assay. A bar graph showing the average fluorescence intensity after 72 hours of incubation of the samples at 37 °C. a) tau protein in buffer, b) aggregated tau with heparin in buffer, c) aggregated tau with heparin in the presence of D-520 (final concentration 5  $\mu$ M).  $\lambda_{Ex}$ = 550 nm,  $\lambda_{Em}$ = 600 nm.

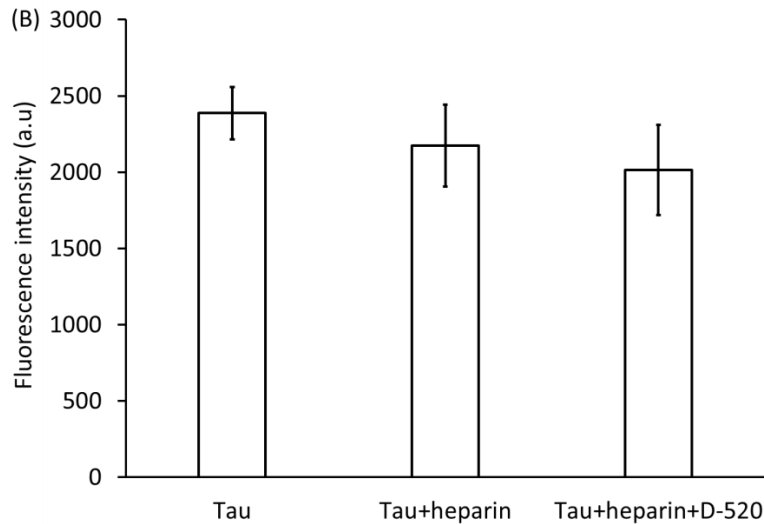

**Figure S24.** Average fluorescence emission spectra of Bis-ANS-bound samples after 72 hours of incubation of the samples at 37 °C. a) tau protein in buffer, b) aggregated tau with heparin in buffer, c) aggregated tau with heparin in the presence of D-520 (final concentration 5  $\mu$ M).  $\lambda_{Ex}$ = 350 nm,  $\lambda_{Em}$ = 510 nm.

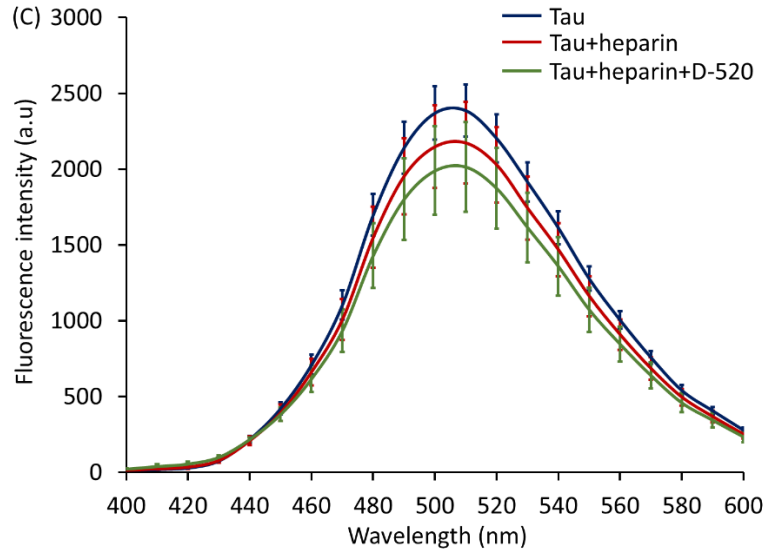

**Figure S25.** Average fluorescence emission spectra of Bis-ANS-bound samples after 72 hours of incubation of the samples at 37 °C. Blue) tau protein in buffer, red) aggregated tau with heparin in buffer, green) aggregated tau with heparin in the presence of D-520 (final concentration 5  $\mu$ M).  $\lambda_{Ex}$ = 350 nm,  $\lambda_{Em}$ = 400-600 nm.

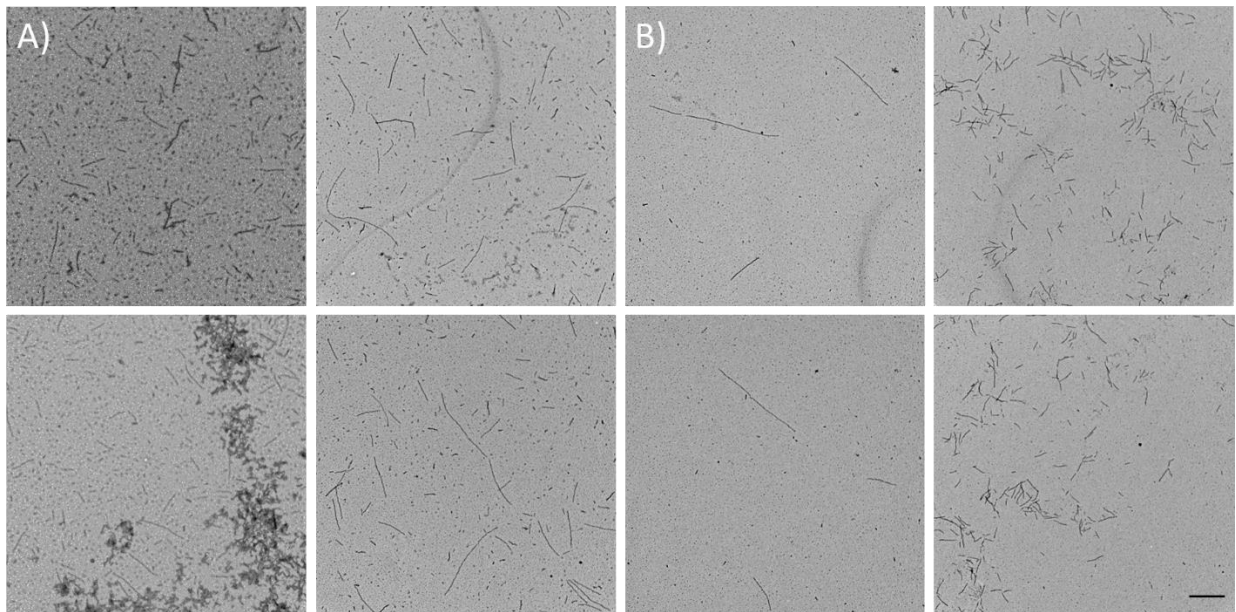

**Figure S26.** TEM images of tau protein samples incubated for 72 hours at 37 °C. A) aggregated tau with heparin, B) aggregated tau with heparin and D-520 (final concentration 5  $\mu$ M). Magnification 22000x, scale bar 500 nm.

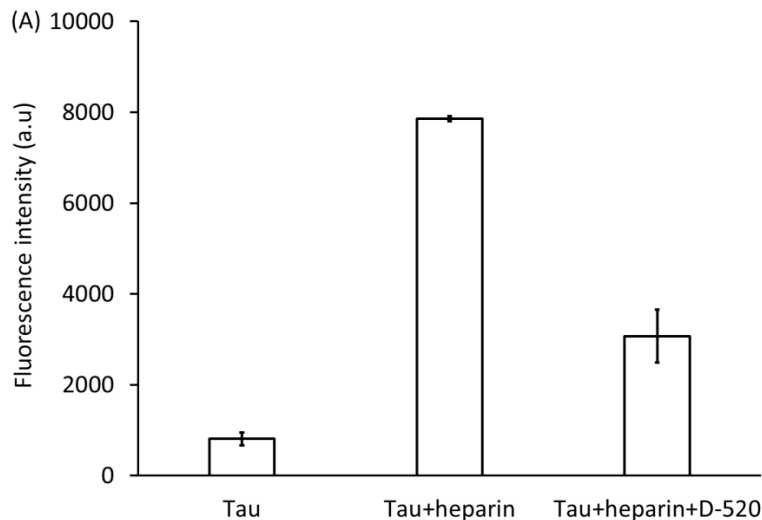

**Figure S27.** Proteostat aggregation assay. A bar graph showing the average fluorescence intensity after 72 hours of incubation of the samples at 37 °C. a) tau protein in buffer, b) aggregated tau with heparin in buffer, c) aggregated tau with heparin in the presence of D-520 (final concentration 40  $\mu$ M).  $\lambda_{Ex}$ = 550 nm,  $\lambda_{Em}$ = 600 nm.

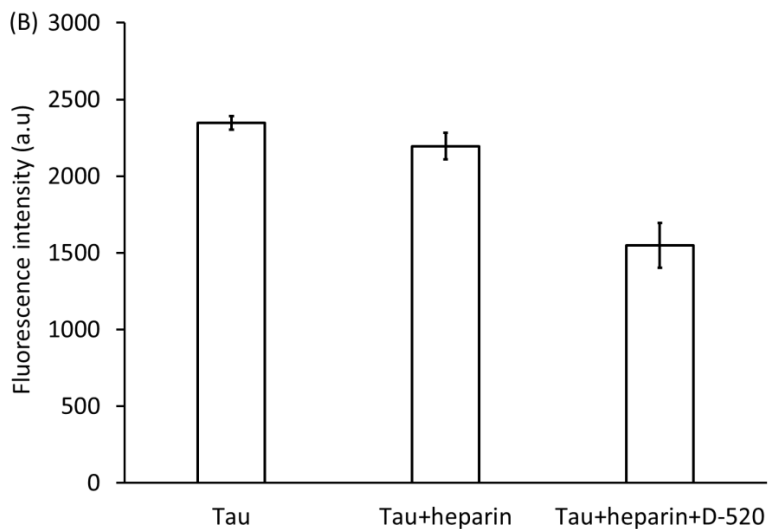

**Figure S28.** Average fluorescence emission spectra of Bis-ANS-bound samples after 72 hours of incubation of the samples at 37 °C. a) tau protein in buffer, b) aggregated tau with heparin in buffer, c) aggregated tau with heparin in the presence of D-520 (final concentration 40  $\mu$ M).  $\lambda_{Ex}$ = 350 nm,  $\lambda_{Em}$ = 510 nm.

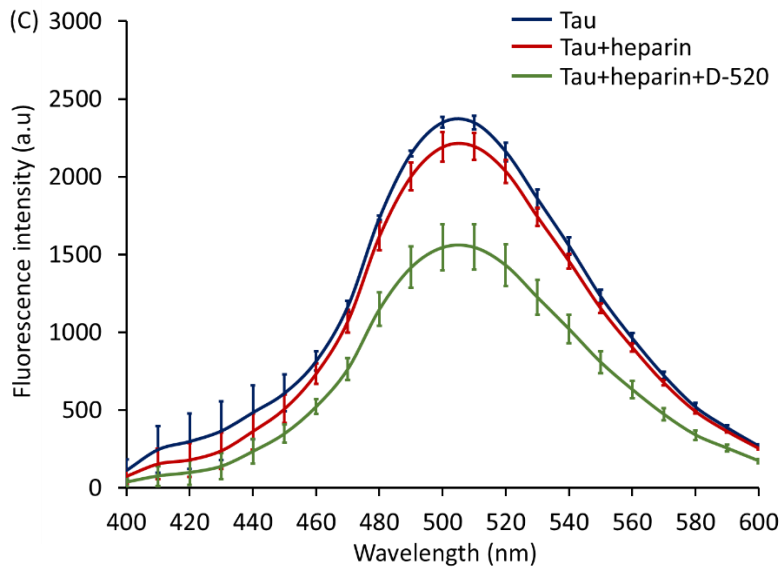

**Figure S29.** Average fluorescence emission spectra of Bis-ANS-bound samples after 72 hours of incubation of the samples at 37 °C. Blue) tau protein in buffer, red) aggregated tau with heparin in buffer, green) aggregated tau with heparin in the presence of D-520 (final concentration 40  $\mu$ M).  $\lambda_{Ex}$ = 350 nm,  $\lambda_{Em}$ = 400-600 nm.

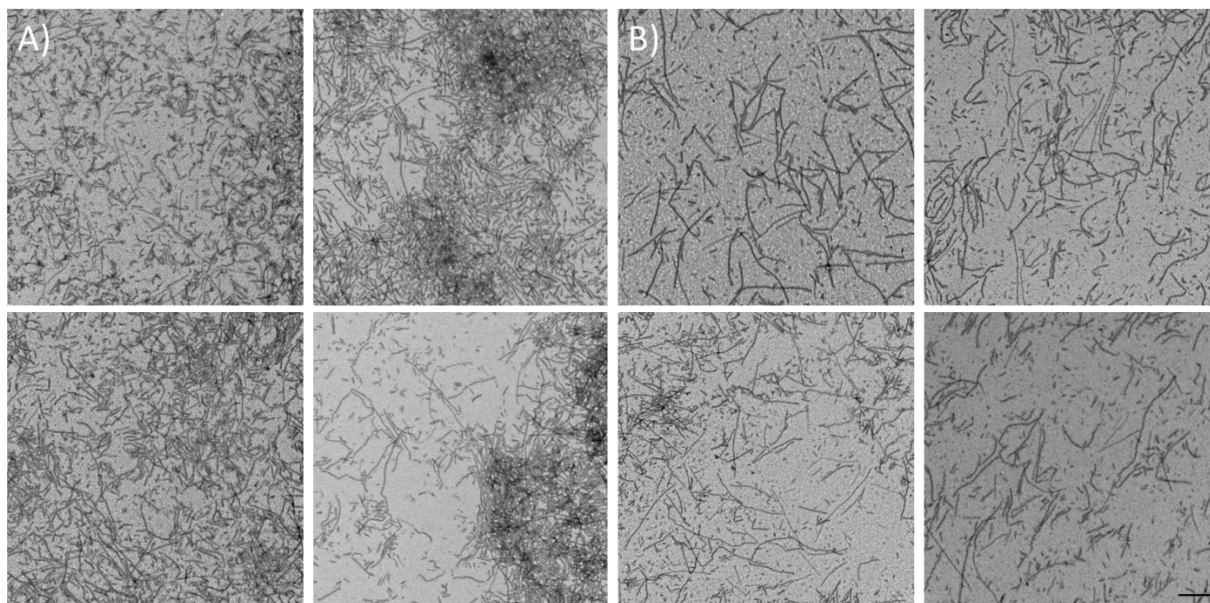

**Figure S30.** TEM images of tau protein samples incubated for 72 hours at 37 °C. A) aggregated tau with heparin, B) aggregated tau with heparin and D-520 (final concentration 40  $\mu$ M). Magnification 22000x, scale bar 500 nm.

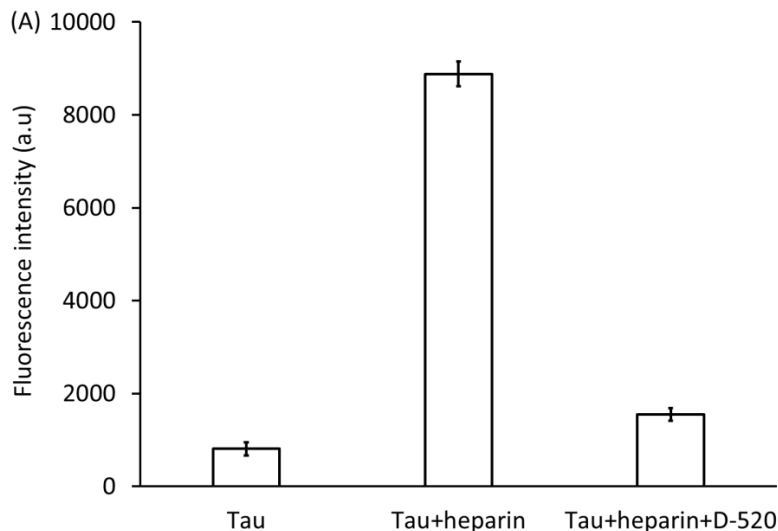

**Figure S31.** Proteostat aggregation assay. A bar graph showing the average fluorescence intensity after 72 hours of incubation of the samples at 37 °C. a) tau protein in buffer, b) aggregated tau with heparin in buffer, c) aggregated tau with heparin in the presence of D-520 (final concentration 120  $\mu$ M).  $\lambda_{Ex}$ = 550 nm,  $\lambda_{Em}$ = 600 nm.

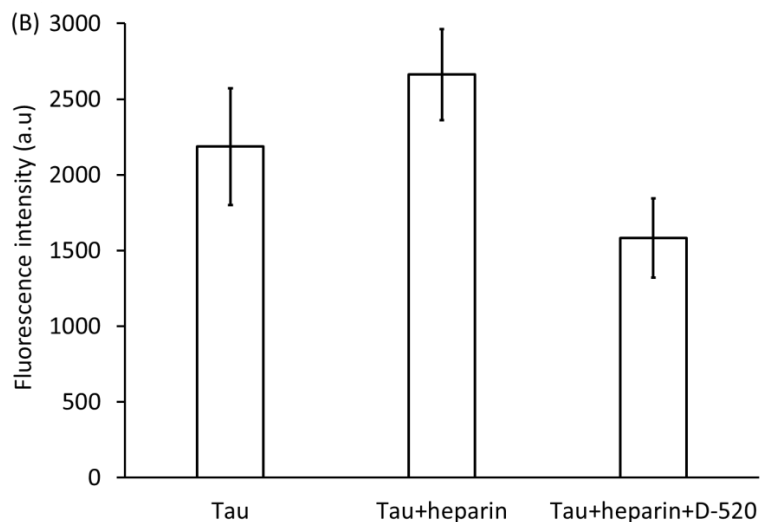

**Figure S32.** Average fluorescence emission spectra of Bis-ANS-bound samples after 72 hours of incubation of the samples at 37 °C. a) tau protein in buffer, b) aggregated tau with heparin in buffer, c) aggregated tau with heparin in the presence of D-520 (final concentration 120  $\mu$ M).  $\lambda_{Ex}$ = 350 nm,  $\lambda_{Em}$ = 510 nm.



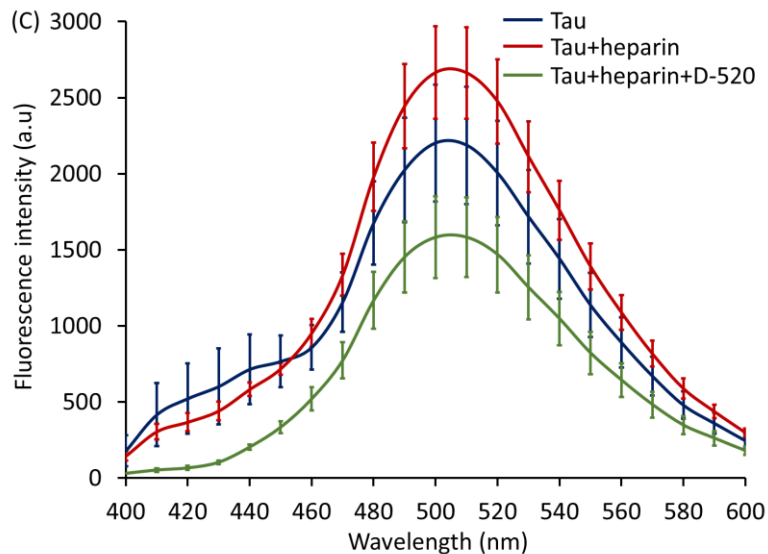

**Figure S33.** Average fluorescence emission spectra of Bis-ANS-bound samples after 72 hours of incubation of the samples at 37 °C. Blue) tau protein in buffer, red) aggregated tau with heparin in buffer, green) aggregated tau with heparin in the presence of D-520 (final concentration 120  $\mu$ M).  $\lambda_{Ex}$ = 350 nm,  $\lambda_{Em}$ = 400-600 nm.

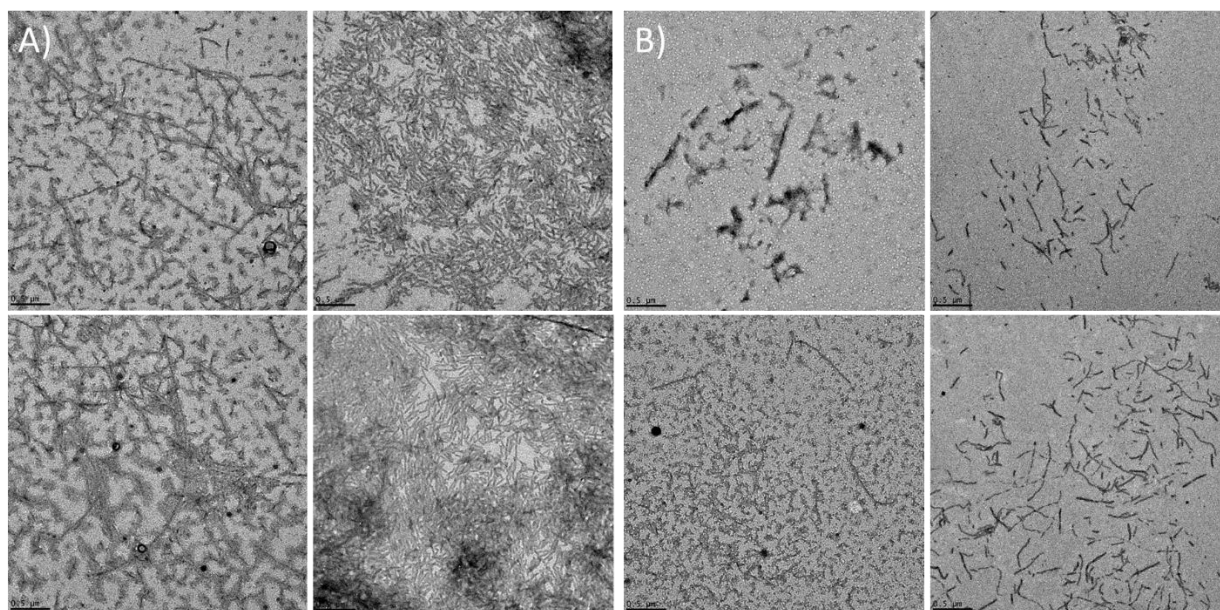

**Figure S34.** TEM images of tau protein samples incubated for 72 hours at 37 °C. A) aggregated tau with heparin, B) aggregated tau with heparin and D-520 (final concentration 120  $\mu$ M). Magnification 22000x, scale bar 500 nm.

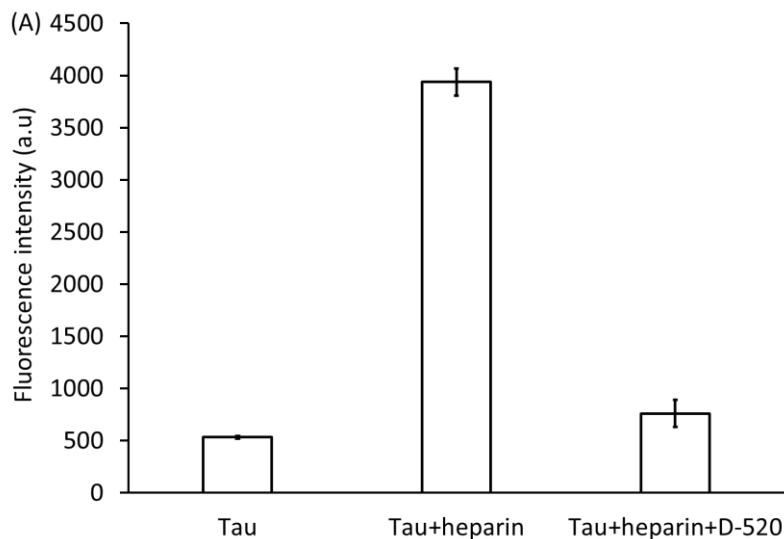

**Figure S35.** Proteostat aggregation assay. A bar graph showing the average fluorescence intensity after 72 hours of incubation of the samples at 37 °C. a) tau protein in buffer, b) aggregated tau with heparin in buffer, c) aggregated tau with heparin in the presence of D-520 (final concentration 250  $\mu$ M).  $\lambda_{Ex}$ = 550 nm,  $\lambda_{Em}$ = 600 nm.

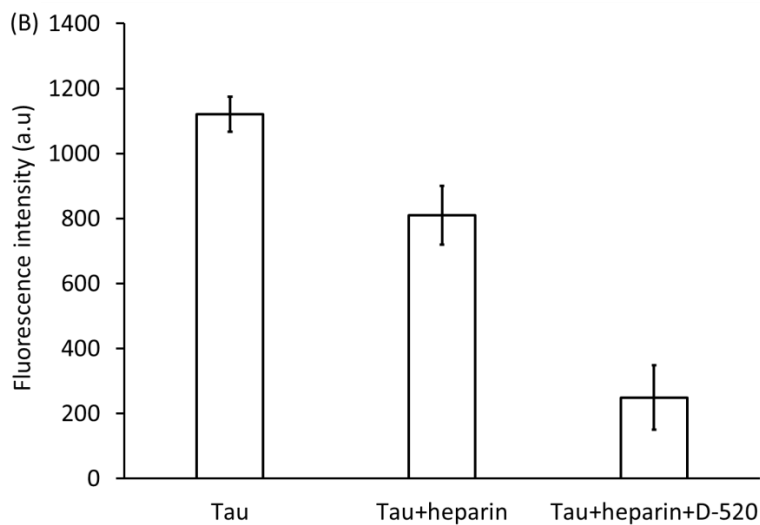

**Figure S36.** Average fluorescence emission spectra of Bis-ANS-bound samples after 72 hours of incubation of the samples at 37 °C. a) tau protein in buffer, b) aggregated tau with heparin in buffer, c) aggregated tau with heparin in the presence of D-520 (final concentration 250  $\mu$ M).  $\lambda_{Ex}$ = 350 nm,  $\lambda_{Em}$ = 510 nm.

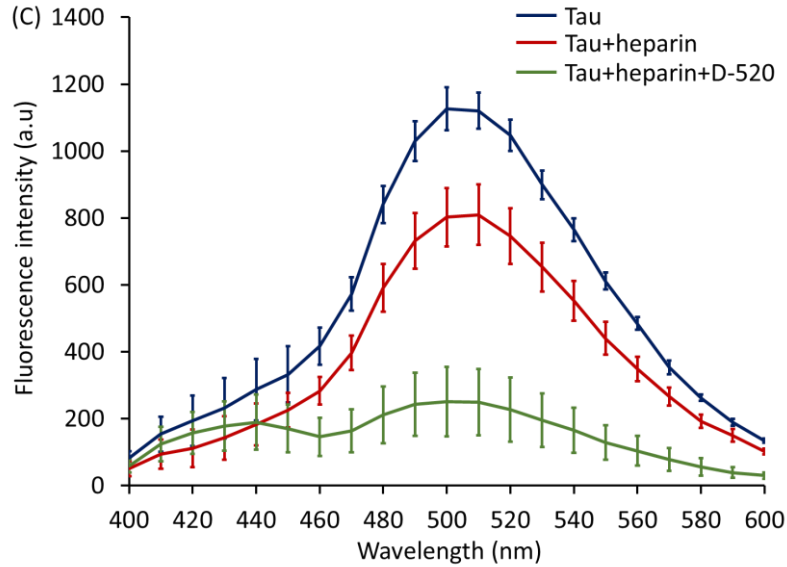

**Figure S37.** Average fluorescence emission spectra of Bis-ANS-bound samples after 72 hours of incubation of the samples at 37 °C. Blue) tau protein in buffer, red) aggregated tau with heparin in buffer, green) aggregated tau with heparin in the presence of D-520 (final concentration 250  $\mu\text{M}$ ).  $\lambda_{\text{Ex}}=350\text{ nm}$ ,  $\lambda_{\text{Em}}=400\text{-}600\text{ nm}$ .

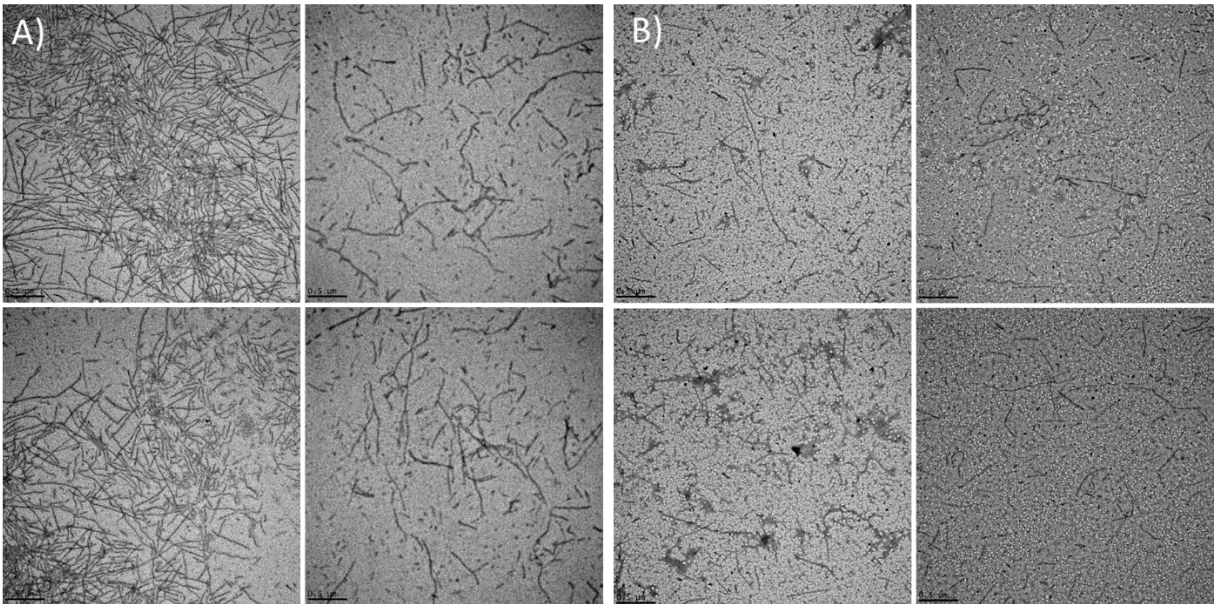

**Figure S38.** TEM images of tau protein samples incubated for 72 hours at 37 °C. A) aggregated tau with heparin, B) aggregated tau with heparin and D-520 (final concentration 250  $\mu\text{M}$ ). Magnification 22000x, scale bar 500 nm.



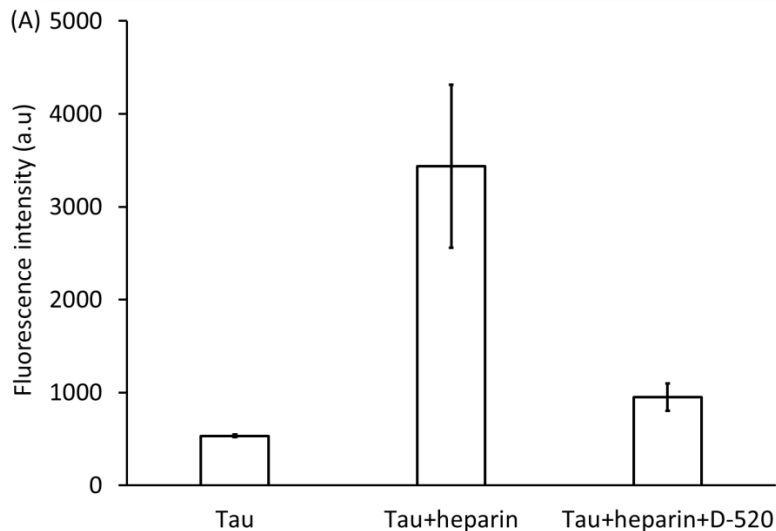

**Figure S39.** Proteostat aggregation assay. A bar graph showing the average fluorescence intensity after 144 hours of incubation of the samples at 37 °C. a) tau protein in buffer, b) aggregated tau with heparin in buffer, c) pre-aggregated tau with heparin for 72 hours, then incubated in the presence of D-520 (final concentration 120  $\mu$ M) for 72 more hours.  $\lambda_{Ex}$ = 550 nm,  $\lambda_{Em}$ = 600 nm.

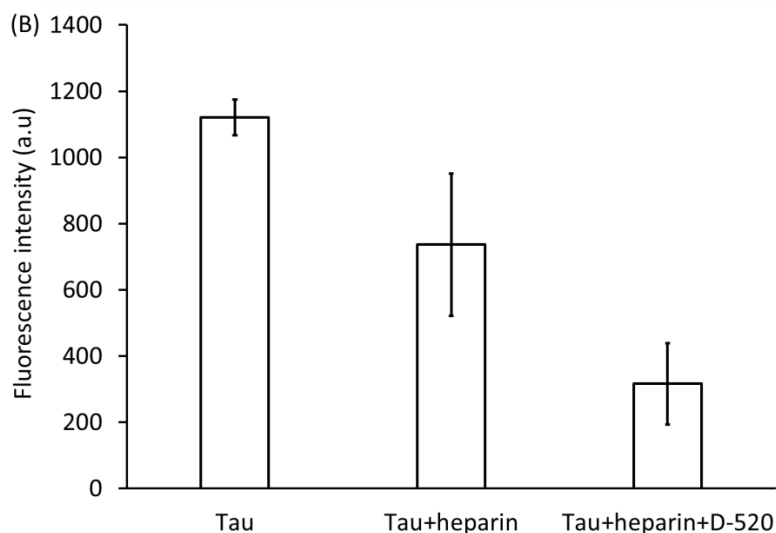

**Figure S40.** Average fluorescence emission spectra of Bis-ANS-bound samples after 144 hours of incubation of the samples at 37 °C. a) tau protein in buffer, b) aggregated tau with heparin in buffer, c) pre-aggregated tau with heparin for 72 hours, then incubated in the presence of D-520 (final concentration 120  $\mu$ M) for 72 more hours.  $\lambda_{Ex}$ = 350 nm,  $\lambda_{Em}$ = 510 nm.

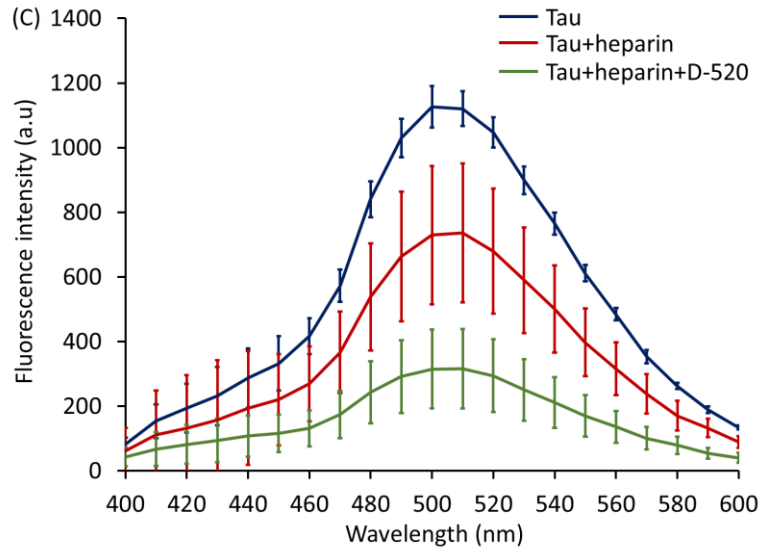

**Figure S41.** Average fluorescence emission spectra of Bis-ANS-bound samples after 144 hours of incubation of the samples at 37 °C. Blue) tau protein in buffer, red) aggregated tau with heparin in buffer, green) pre-aggregated tau with heparin for 72 hours, then incubated in the presence of D-520 (final concentration 120  $\mu$ M) for 72 more hours.  $\lambda_{Ex}$ = 350 nm,  $\lambda_{Em}$ = 400-600 nm.

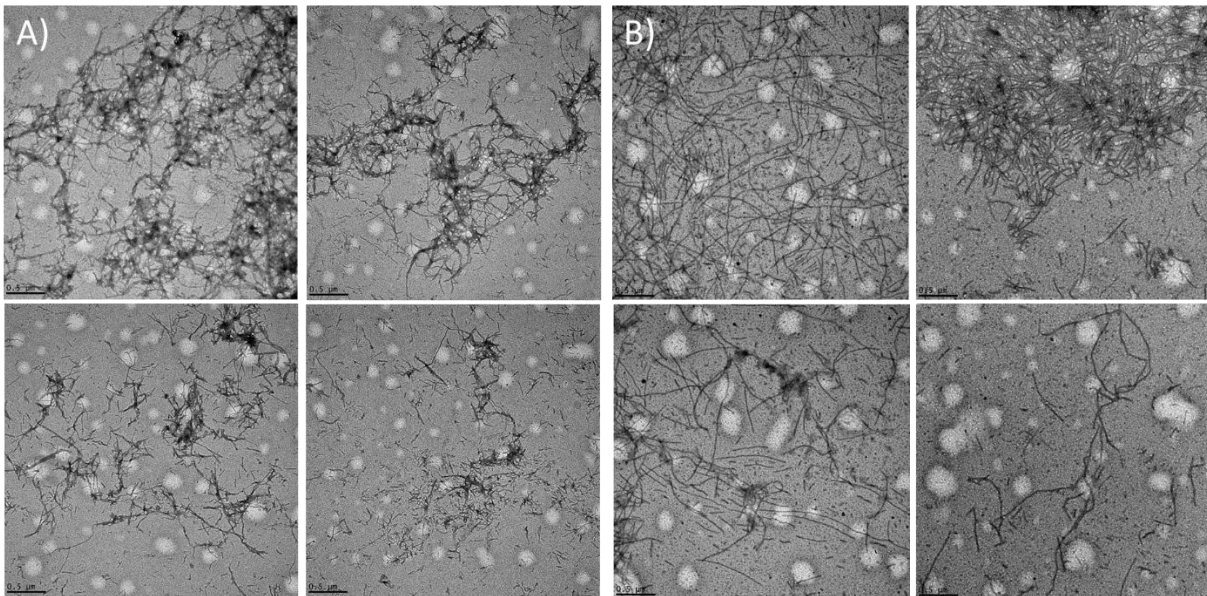

**Figure S42.** TEM images of tau protein samples incubated for 144 hours at 37 °C. A) aggregated tau with heparin, B) pre-aggregated tau with heparin for 72 hours, then incubated with D-520 (final concentration 120  $\mu$ M) for 72 more hours. Magnification 22000x, scale bar 500 nm.

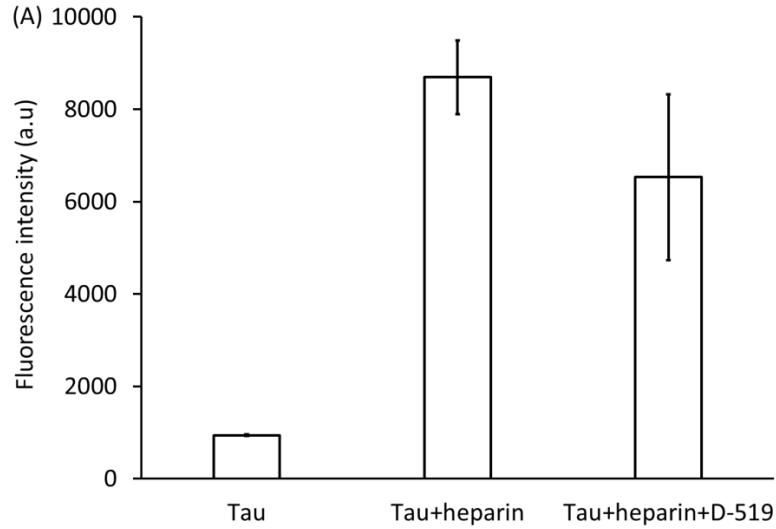

**Figure 43.** Proteostat aggregation assay. A bar graph showing the average fluorescence intensity after 72 hours of incubation of the samples at 37 °C. a) tau protein in buffer, b) aggregated tau with heparin in buffer, c) aggregated tau with heparin in the presence of D-519 (final concentration 5  $\mu$ M).  $\lambda_{Ex}$ = 550 nm,  $\lambda_{Em}$ = 600 nm.

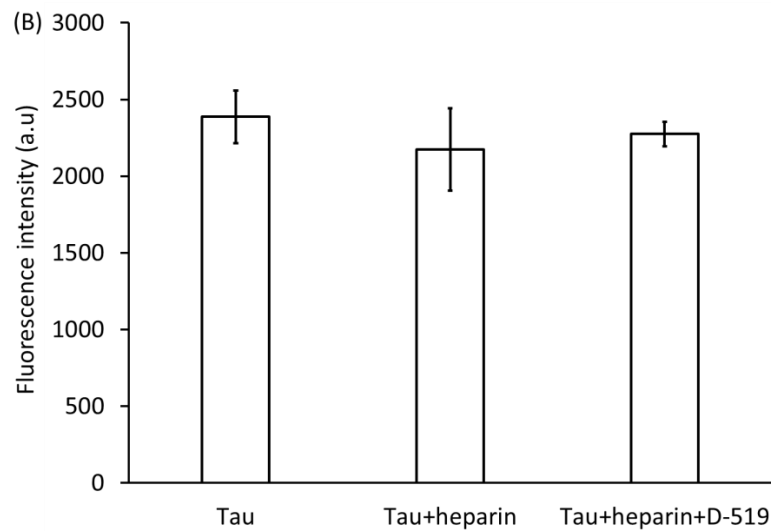

**Figure S44.** Average fluorescence emission spectra of Bis-ANS-bound samples after 72 hours of incubation of the samples at 37 °C. a) tau protein in buffer, b) aggregated tau with heparin in buffer, c) aggregated tau with heparin in the presence of D-519 (final concentration 5  $\mu$ M).  $\lambda_{Ex}$ = 350 nm,  $\lambda_{Em}$ = 510 nm.

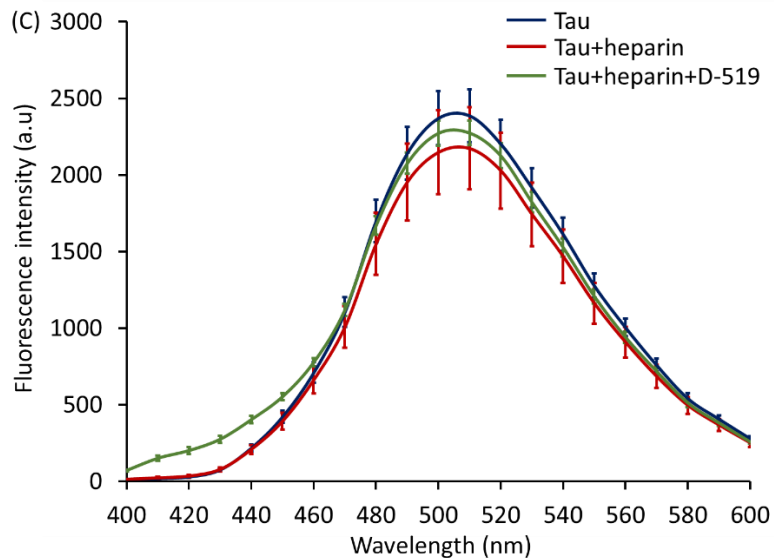

**Figure 45.** Average fluorescence emission spectra of Bis-ANS-bound samples after 72 hours of incubation of the samples at 37 °C. Blue) tau protein in buffer, red) aggregated tau with heparin in buffer, green) aggregated tau with heparin in the presence of D-519 (final concentration 5  $\mu$ M).  $\lambda_{Ex}$ = 350 nm,  $\lambda_{Em}$ = 400-600 nm.

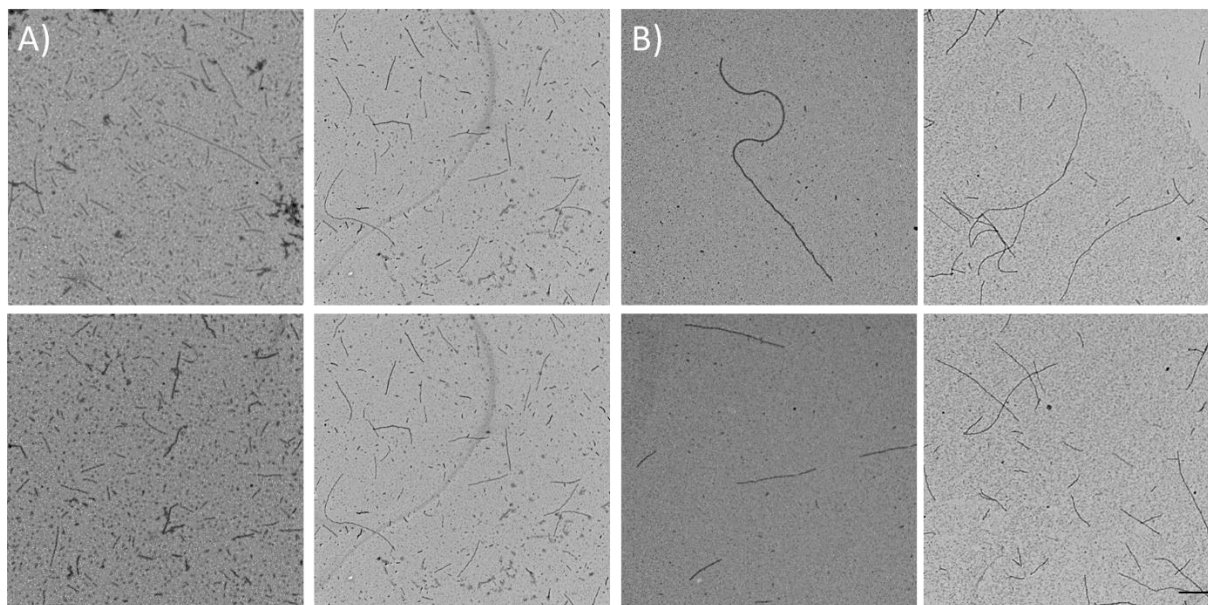

**Figure S46.** TEM images of tau protein samples incubated for 72 hours at 37 °C. A) aggregated tau with heparin, B) aggregated tau with heparin and D-519 (final concentration 5  $\mu$ M). Magnification 22000x, scale bar 500 nm.

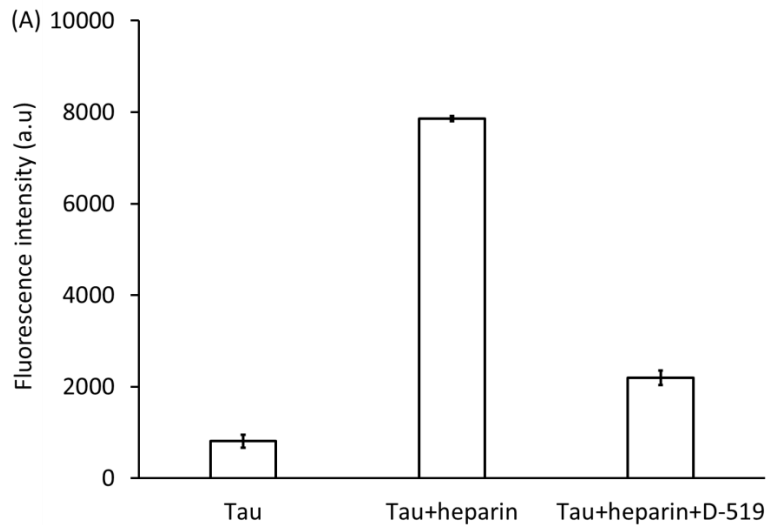

**Figure S47.** Proteostat aggregation assay. A bar graph showing the average fluorescence intensity after 72 hours of incubation of the samples at 37 °C. a) tau protein in buffer, b) aggregated tau with heparin in buffer, c) aggregated tau with heparin in the presence of D-519 (final concentration 40  $\mu$ M).  $\lambda_{Ex}$ = 550 nm,  $\lambda_{Em}$ = 600 nm.

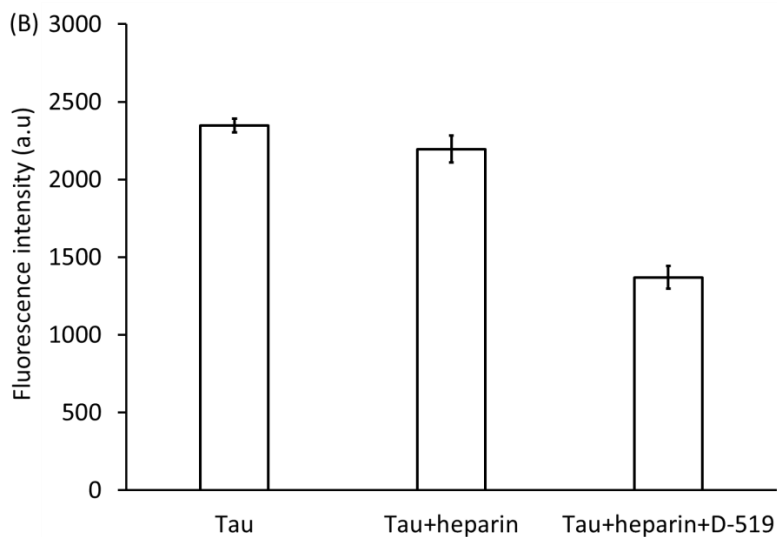

**Figure S48.** Average fluorescence emission spectra of Bis-ANS-bound samples after 72 hours of incubation of the samples at 37 °C. a) tau protein in buffer, b) aggregated tau with heparin in buffer, c) aggregated tau with heparin in the presence of D-519 (final concentration 40  $\mu$ M).  $\lambda_{Ex}$ = 350 nm,  $\lambda_{Em}$ = 510 nm.



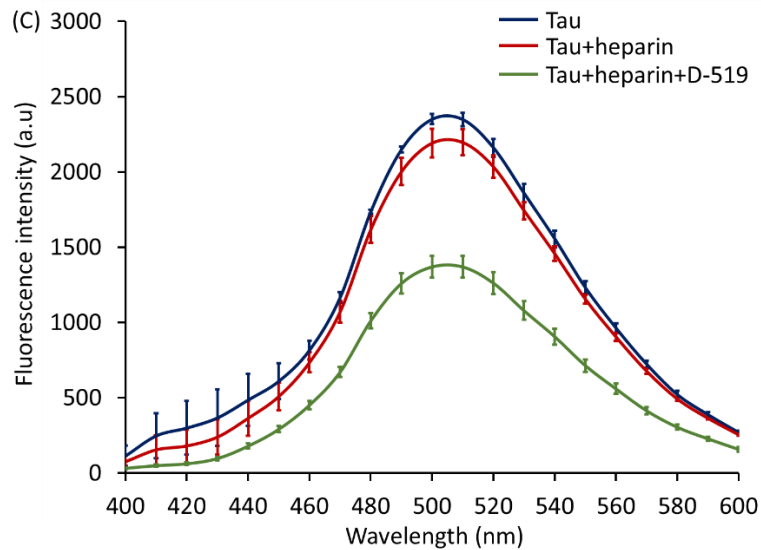

**Figure S49.** Average fluorescence emission spectra of Bis-ANS-bound samples after 72 hours of incubation of the samples at 37 °C. Blue) tau protein in buffer, red) aggregated tau with heparin in buffer, green) aggregated tau with heparin in the presence of D-519 (final concentration 40  $\mu$ M).  $\lambda_{Ex}$  = 350 nm,  $\lambda_{Em}$  = 400-600 nm.

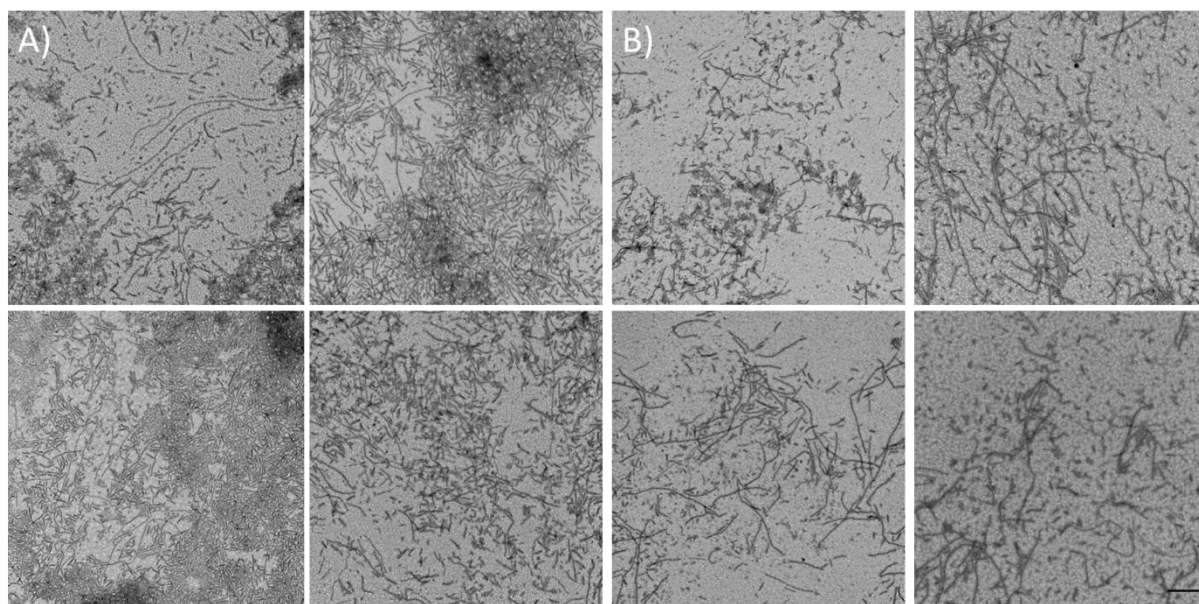

**Figure S50.** TEM images of tau protein samples incubated for 72 hours at 37 °C. A) aggregated tau with heparin, B) aggregated tau with heparin and D-519 (final concentration 40  $\mu$ M). Magnification 22000x, scale bar 500 nm.

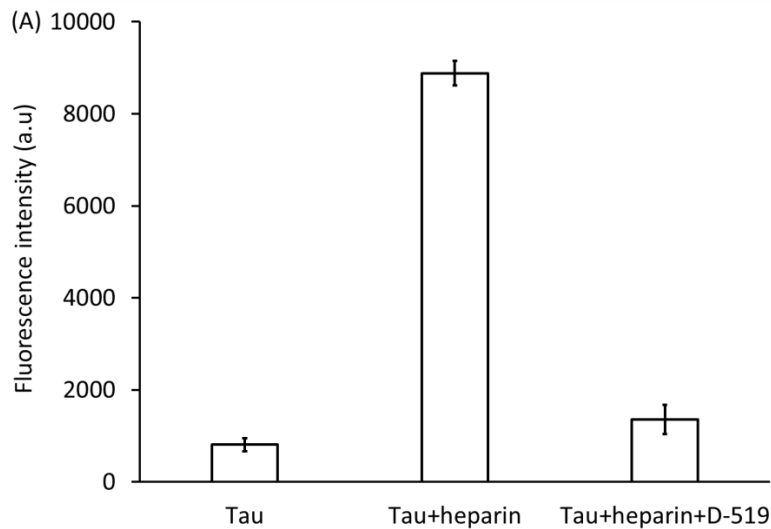

**Figure S51.** Proteostat aggregation assay. A bar graph showing the average fluorescence intensity after 72 hours of incubation of the samples at 37 °C. a) tau protein in buffer, b) aggregated tau with heparin in buffer, c) aggregated tau with heparin in the presence of D-519 (final concentration 120  $\mu$ M).  $\lambda_{Ex}$ = 550 nm,  $\lambda_{Em}$ = 600 nm.

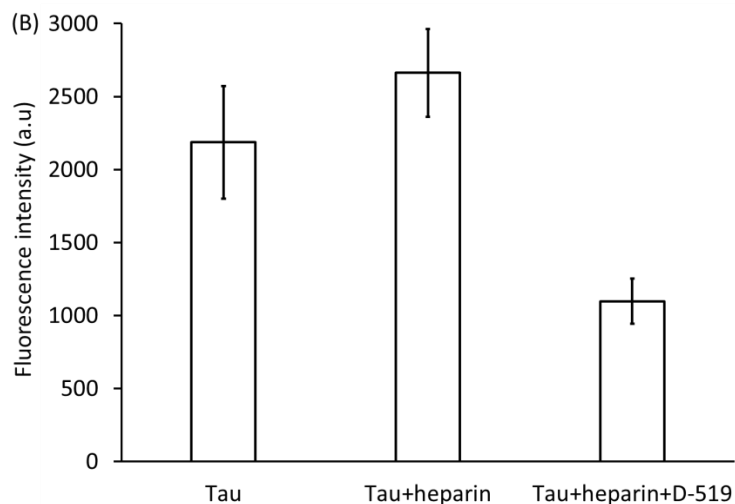

**Figure S52.** Average fluorescence emission spectra of Bis-ANS-bound samples after 72 hours of incubation of the samples at 37 °C. a) tau protein in buffer, b) aggregated tau with heparin in buffer, c) aggregated tau with heparin in the presence of D-519 (final concentration 120  $\mu$ M).  $\lambda_{Ex}$ = 350 nm,  $\lambda_{Em}$ = 510 nm.

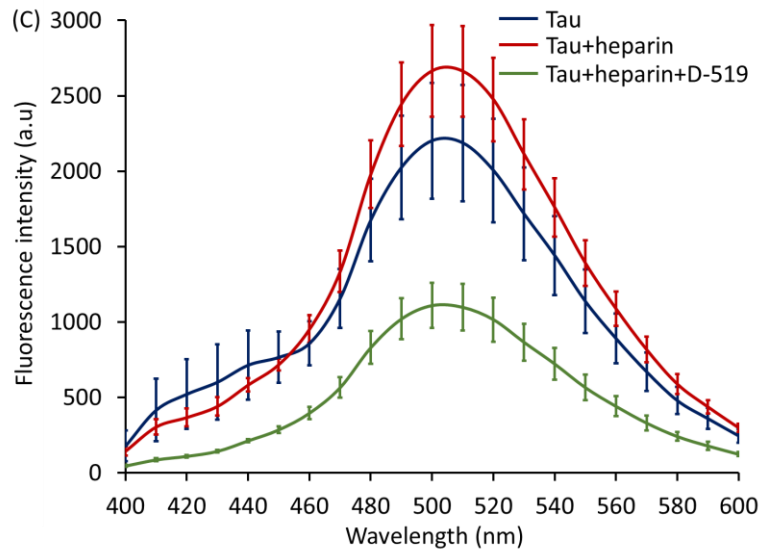

**Figure S53.** Average fluorescence emission spectra of Bis-ANS-bound samples after 72 hours of incubation of the samples at 37 °C. Blue) tau protein in buffer, red) aggregated tau with heparin in buffer, green) aggregated tau with heparin in the presence of D-519 (final concentration 120  $\mu$ M).  $\lambda_{Ex}$  = 350 nm,  $\lambda_{Em}$  = 400-600 nm.

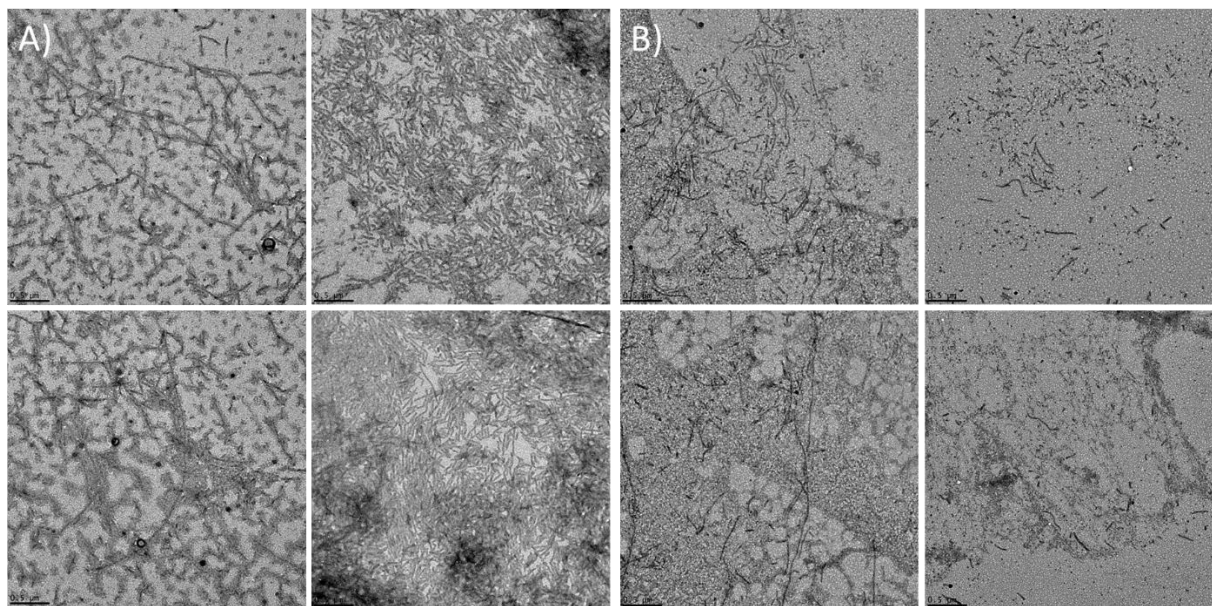

**Figure S54.** TEM images of tau protein samples incubated for 72 hours at 37 °C. A) aggregated tau with heparin, B) aggregated tau with heparin and D-519 (final concentration 120  $\mu$ M). Magnification 22000x, scale bar 500 nm.



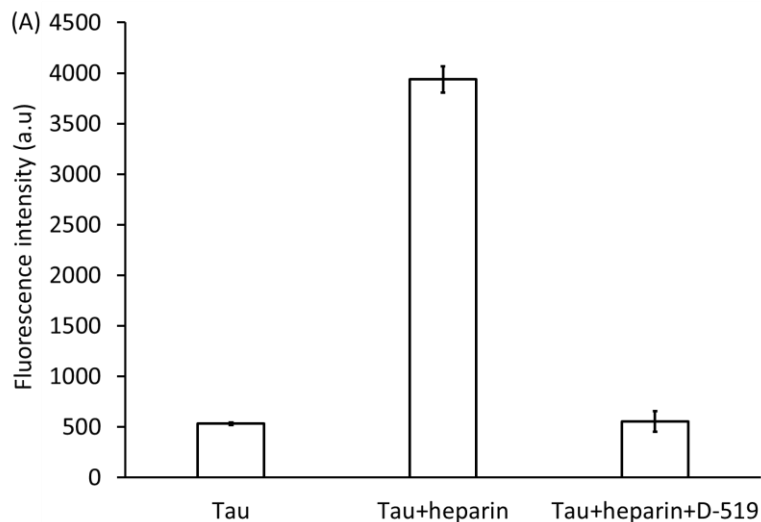

**Figure S55.** Proteostat aggregation assay. A bar graph showing the average fluorescence intensity after 72 hours of incubation of the samples at 37 °C. a) tau protein in buffer, b) aggregated tau with heparin in buffer, c) aggregated tau with heparin in the presence of D-519 (final concentration 250  $\mu$ M).  $\lambda_{Ex}$ = 550 nm,  $\lambda_{Em}$ = 600 nm.

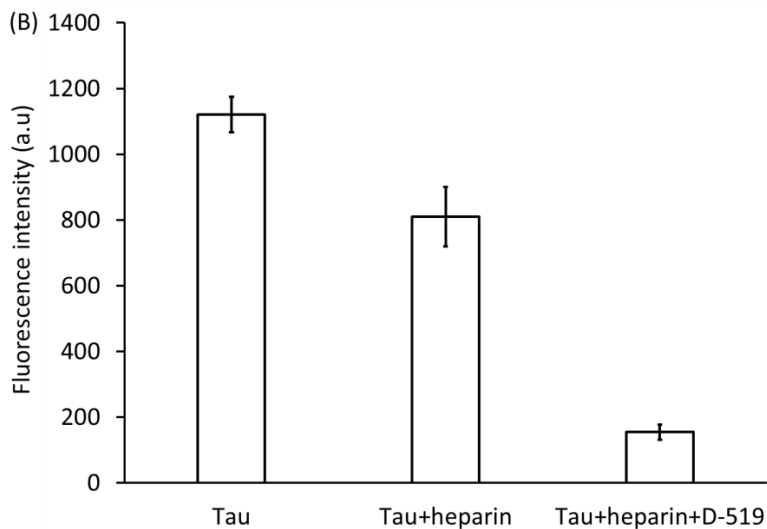

**Figure S56.** Average fluorescence emission spectra of Bis-ANS-bound samples after 72 hours of incubation of the samples at 37 °C. a) tau protein in buffer, b) aggregated tau with heparin in buffer, c) aggregated tau with heparin in the presence of D-519 (final concentration 250  $\mu$ M).  $\lambda_{Ex}$ = 350 nm,  $\lambda_{Em}$ = 510 nm.

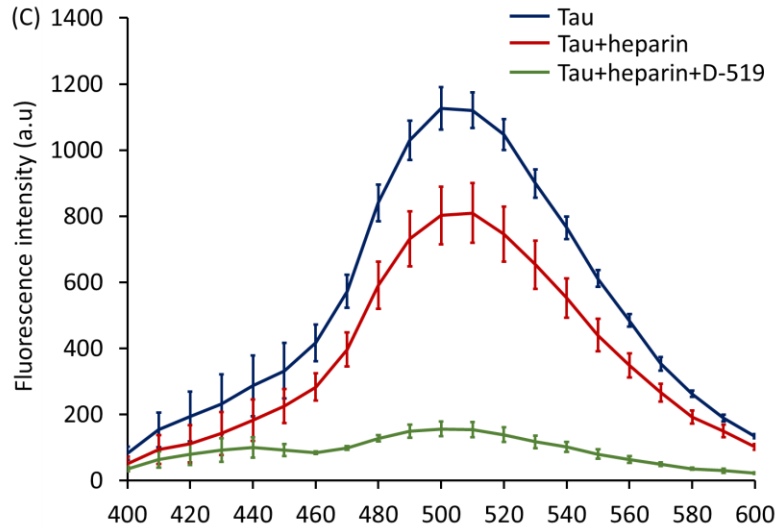

**Figure S57.** Average fluorescence emission spectra of Bis-ANS-bound samples after 72 hours of incubation of the samples at 37 °C. Blue) tau protein in buffer, red) aggregated tau with heparin in buffer, green) aggregated tau with heparin in the presence of D-519 (final concentration 250  $\mu$ M).  $\lambda_{Ex}$ = 350 nm,  $\lambda_{Em}$ = 400-600 nm.

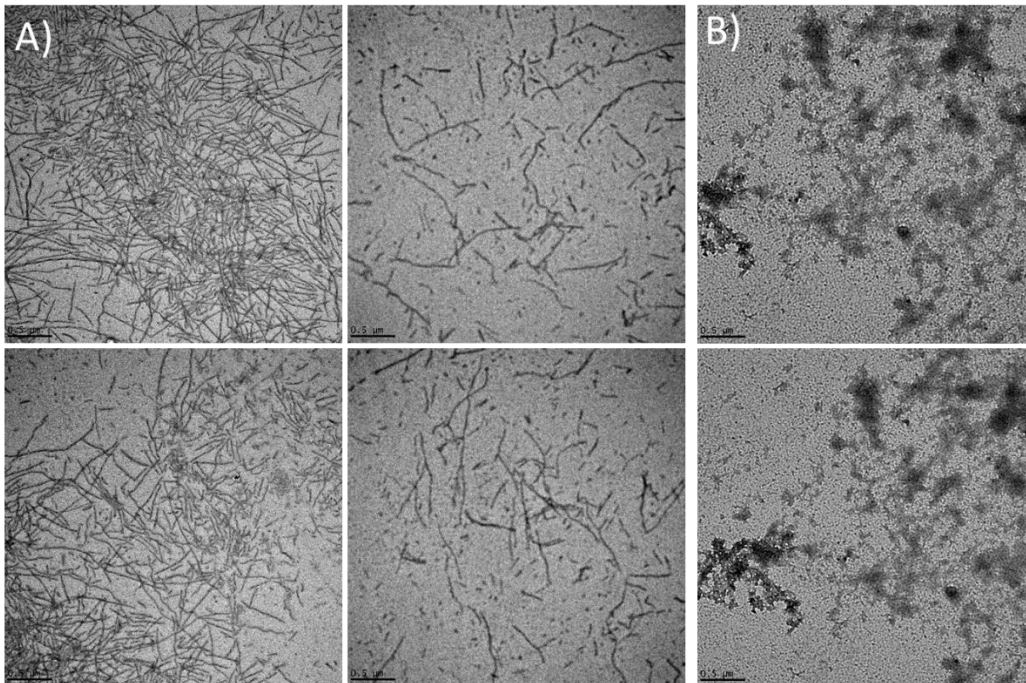

**Figure S58.** TEM images of tau protein samples incubated for 72 hours at 37 °C. A) aggregated tau with heparin, B) aggregated tau with heparin and D-519 (final concentration 250  $\mu$ M). Magnification 22000x, scale bar 500 nm.

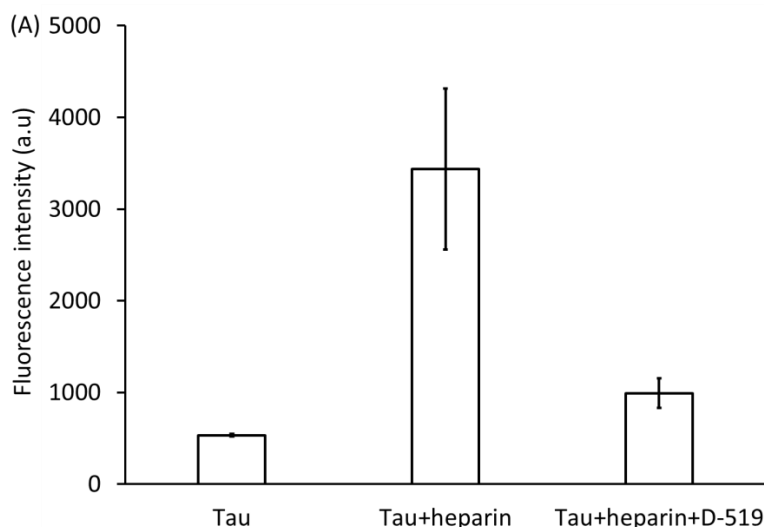

**Figure S59.** Proteostat aggregation assay. A bar graph showing the average fluorescence intensity after 144 hours of incubation of the samples at 37 °C. a) tau protein in buffer, b) aggregated tau with heparin in buffer, c) pre-aggregated tau with heparin for 72 hours, then incubated in the presence of D-519 (final concentration 120  $\mu$ M) for 72 more hours.  $\lambda_{\text{Ex}}= 550$  nm,  $\lambda_{\text{Em}}= 600$  nm.

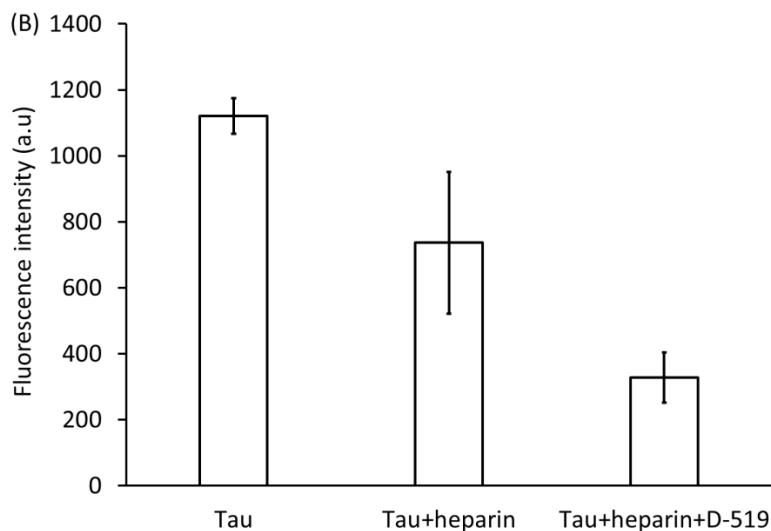

**Figure S60.** Average fluorescence emission spectra of Bis-ANS-bound samples after 144 hours of incubation of the samples at 37 °C. a) tau protein in buffer, b) aggregated tau with heparin in buffer, c) pre-aggregated tau with heparin for 72 hours, then incubated in the presence of D-519 (final concentration 120  $\mu$ M) for 72 more hours.  $\lambda_{\text{Ex}}= 350$  nm,  $\lambda_{\text{Em}}= 510$  nm.

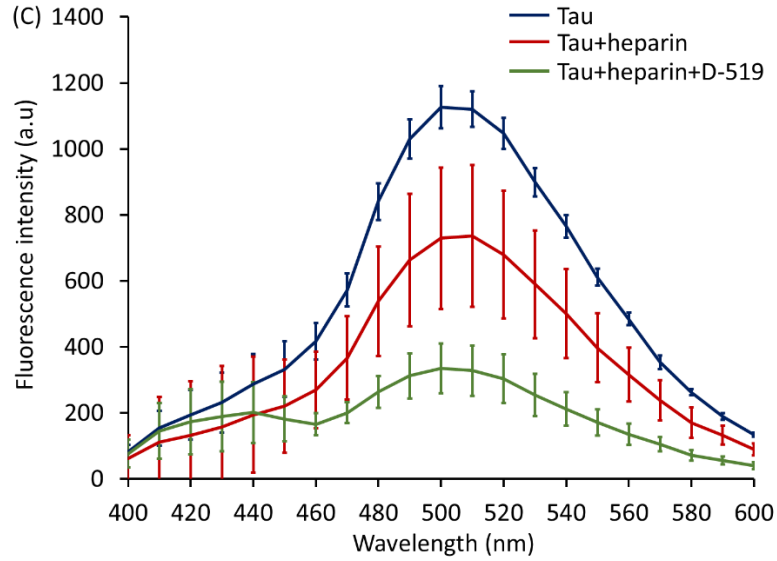

**Figure S61.** Average fluorescence emission spectra of Bis-ANS-bound samples after 144 hours of incubation of the samples at 37 °C. Blue) tau protein in buffer, red) aggregated tau with heparin in buffer, green) pre-aggregated tau with heparin for 72 hours, then incubated in the presence of D-519 (final concentration 120  $\mu$ M) for 72 more hours.  $\lambda_{Ex}$ = 350 nm,  $\lambda_{Em}$ = 400-600 nm.

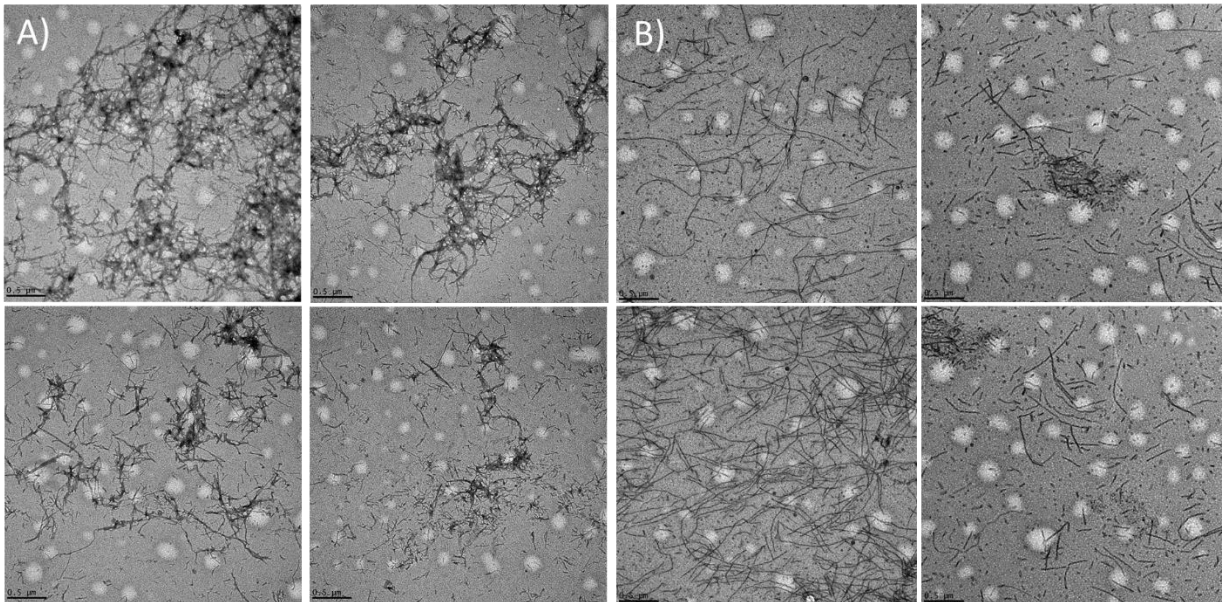

**Figure S62.** TEM images of tau protein samples incubated for 144 hours at 37 °C. A) aggregated tau with heparin, B) pre-aggregated tau with heparin for 72 hours, then incubated with D-519 (final concentration 120  $\mu$ M) for 72 more hours. Magnification 22000x, scale bar 500 nm.

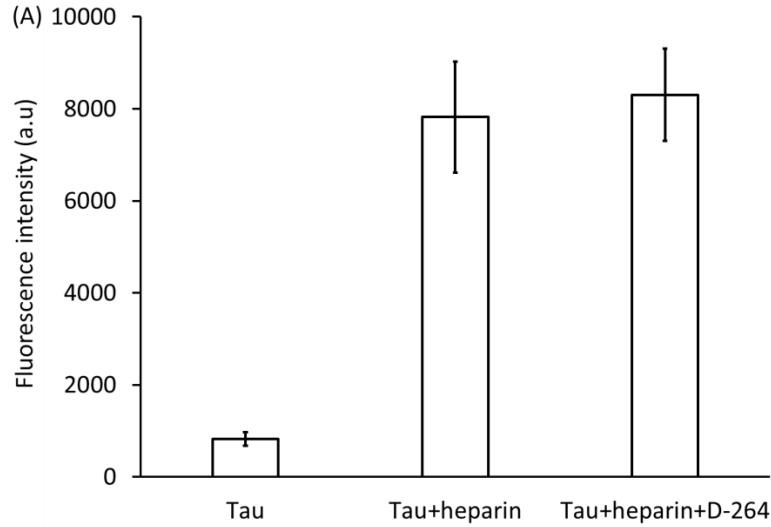

**Figure S63.** Proteostat aggregation assay. A bar graph showing the average fluorescence intensity after 72 hours of incubation of the samples at 37 °C. a) tau protein in buffer, b) aggregated tau with heparin in buffer, c) aggregated tau with heparin in the presence of D-264 (final concentration 5  $\mu$ M).  $\lambda_{Ex}$ = 550 nm,  $\lambda_{Em}$ = 600 nm.

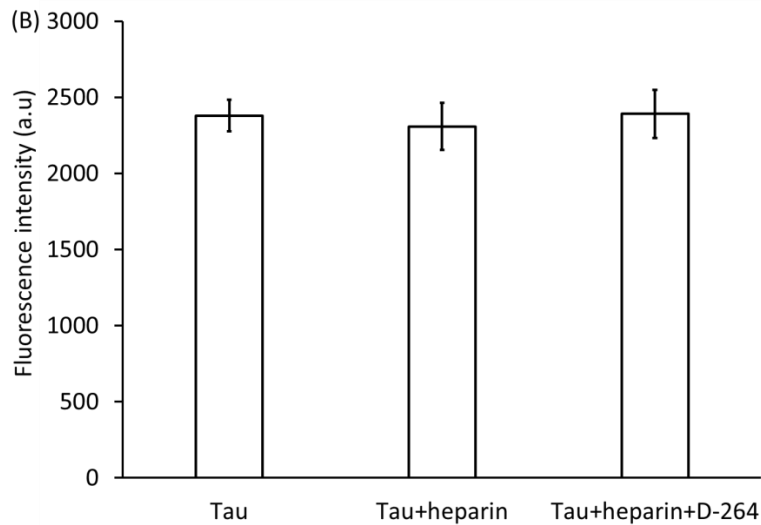

**Figure S64.** Average fluorescence emission spectra of Bis-ANS-bound samples after 72 hours of incubation of the samples at 37 °C. a) tau protein in buffer, b) aggregated tau with heparin in buffer, c) aggregated tau with heparin in the presence of D-264 (final concentration 5  $\mu$ M).  $\lambda_{Ex}$ = 350 nm,  $\lambda_{Em}$ = 510 nm.



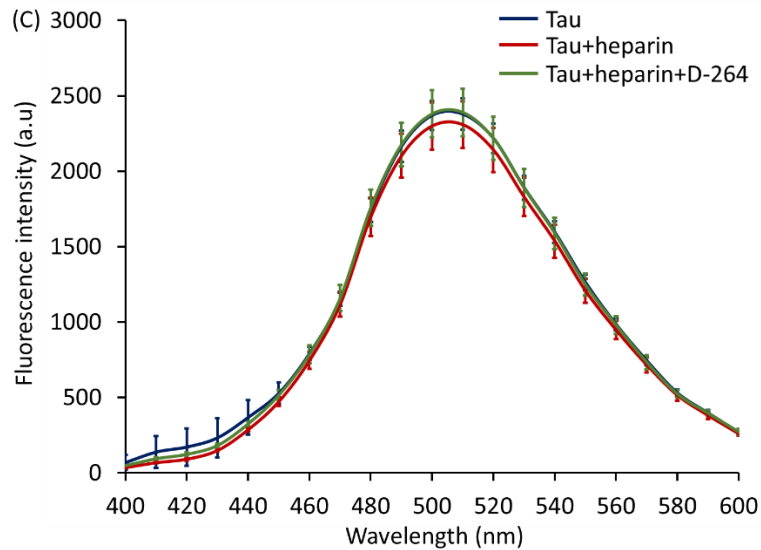

**Figure S65.** Average fluorescence emission spectra of Bis-ANS-bound samples after 72 hours of incubation of the samples at 37 °C. Blue) tau protein in buffer, red) aggregated tau with heparin in buffer, green) aggregated tau with heparin in the presence of D-264 (final concentration 5  $\mu$ M).  $\lambda_{Ex}$ = 350 nm,  $\lambda_{Em}$ = 400-600 nm.

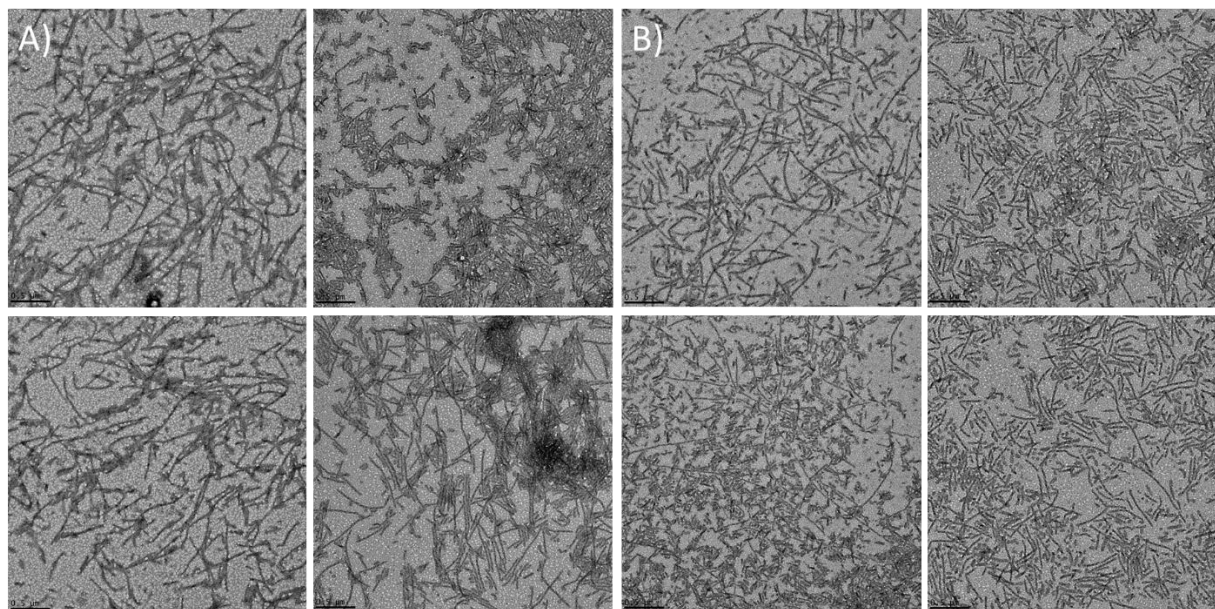

**Figure S66.** TEM images of tau protein samples incubated for 72 hours at 37 °C. A) aggregated tau with heparin, B) aggregated tau with heparin and D-264 (final concentration 5  $\mu$ M). Magnification 22000x, scale bar 500 nm.

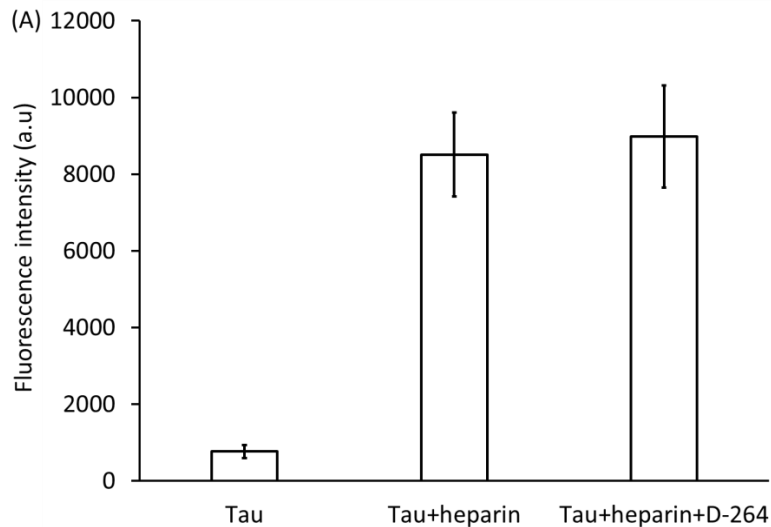

**Figure S67.** Proteostat aggregation assay. A bar graph showing the average fluorescence intensity after 72 hours of incubation of the samples at 37 °C. a) tau protein in buffer, b) aggregated tau with heparin in buffer, c) aggregated tau with heparin in the presence of D-264 (final concentration 40  $\mu$ M).  $\lambda_{\text{EX}}= 550$  nm,  $\lambda_{\text{Em}}= 600$  nm.

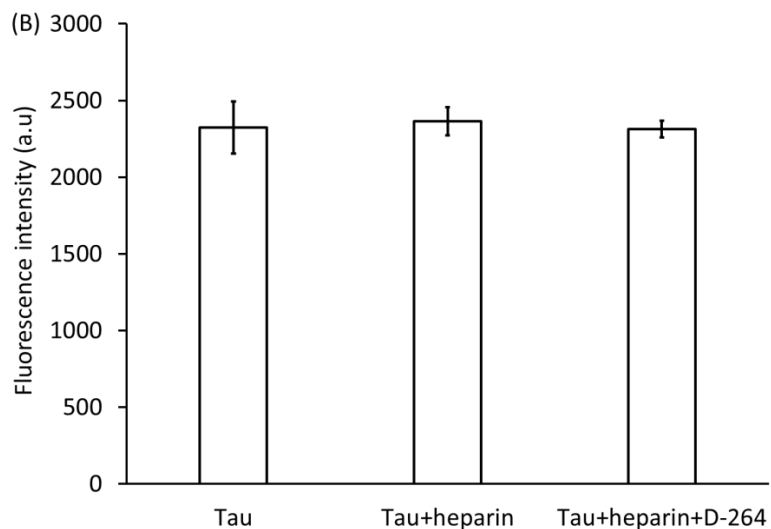

**Figure S68.** Average fluorescence emission spectra of Bis-ANS-bound samples after 72 hours of incubation of the samples at 37 °C. a) tau protein in buffer, b) aggregated tau with heparin in buffer, c) aggregated tau with heparin in the presence of D-264 (final concentration 40  $\mu$ M).  $\lambda_{\text{EX}}= 350$  nm,  $\lambda_{\text{Em}}= 510$  nm.

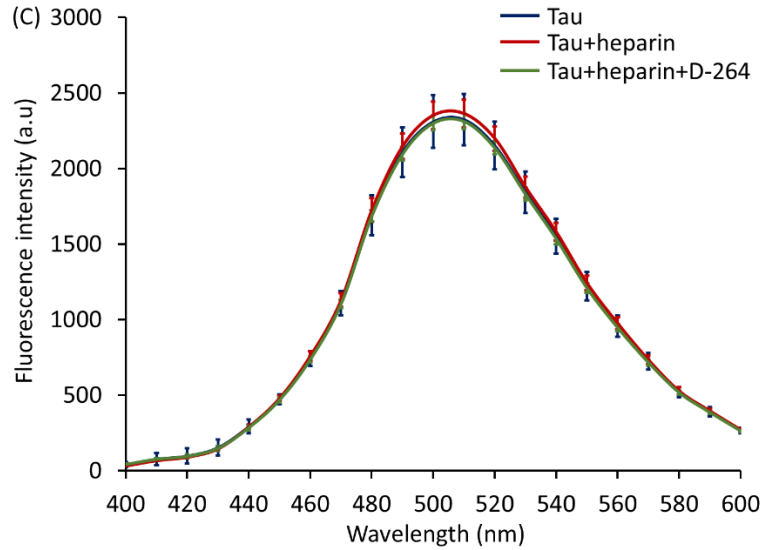

**Figure S69.** Average fluorescence emission spectra of Bis-ANS-bound samples after 72 hours of incubation of the samples at 37 °C. Blue) tau protein in buffer, red) aggregated tau with heparin in buffer, green) aggregated tau with heparin in the presence of D-264 (final concentration 40  $\mu$ M).  $\lambda_{Ex}$  = 350 nm,  $\lambda_{Em}$  = 400-600 nm.

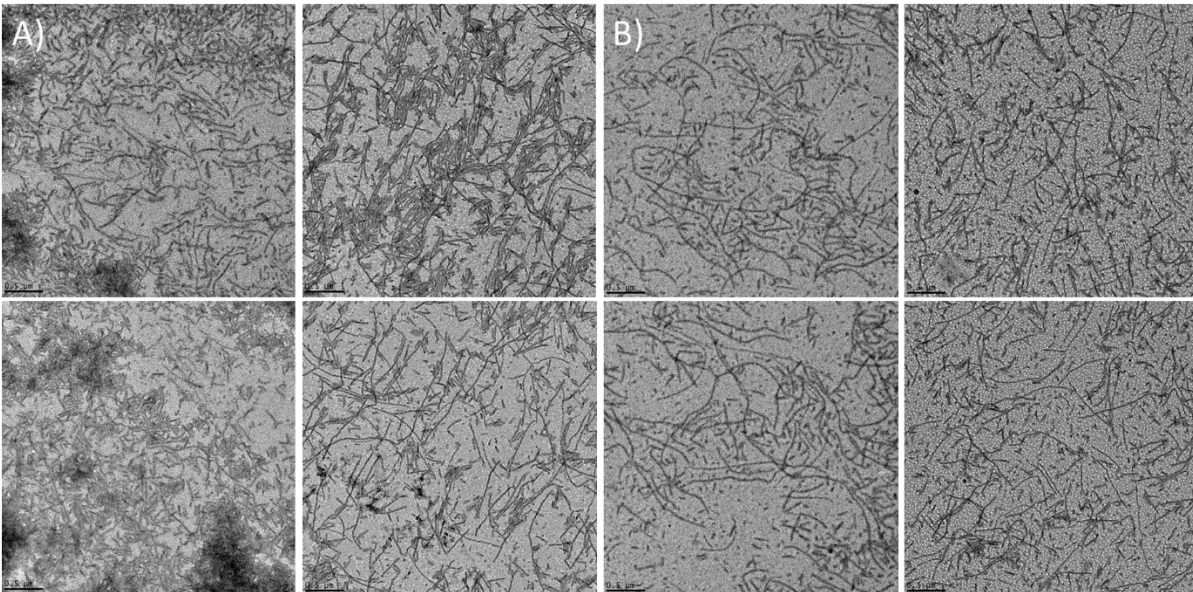

**Figure S70.** TEM images of tau protein samples incubated for 72 hours at 37 °C. A) aggregated tau with heparin, B) aggregated tau with heparin and D-264 (final concentration 40  $\mu$ M). Magnification 22000x, scale bar 500 nm.



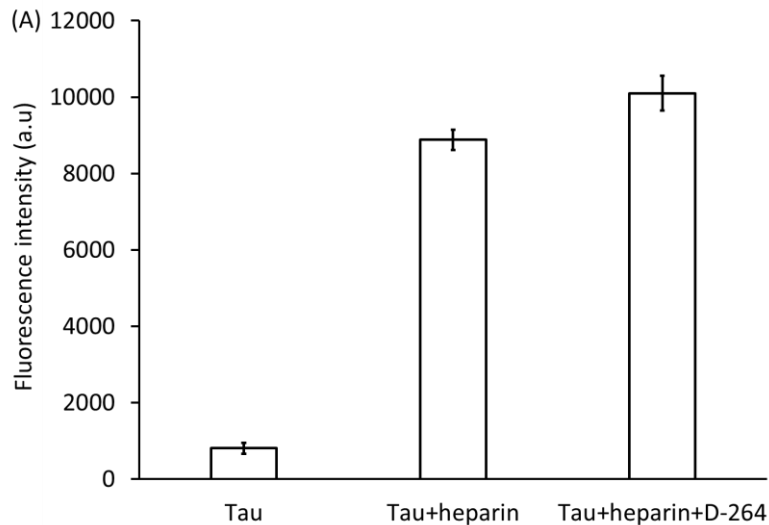

**Figure S71.** Proteostat aggregation assay. A bar graph showing the average fluorescence intensity after 72 hours of incubation of the samples at 37 °C. a) tau protein in buffer, b) aggregated tau with heparin in buffer, c) aggregated tau with heparin in the presence of D-264 (final concentration 120  $\mu$ M).  $\lambda_{Ex}$ = 550 nm,  $\lambda_{Em}$ = 600 nm.

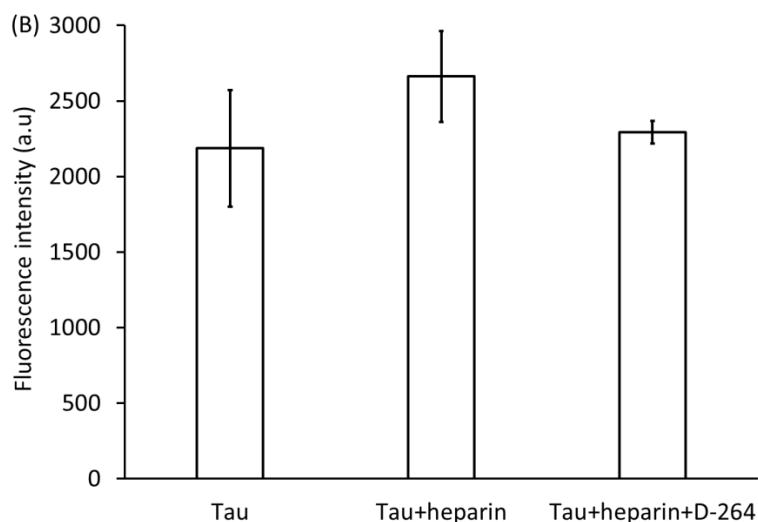

**Figure S72.** Average fluorescence emission spectra of Bis-ANS-bound samples after 72 hours of incubation of the samples at 37 °C. a) tau protein in buffer, b) aggregated tau with heparin in buffer, c) aggregated tau with heparin in the presence of D-264 (final concentration 120  $\mu$ M).  $\lambda_{Ex}$ = 350 nm,  $\lambda_{Em}$ = 510 nm.

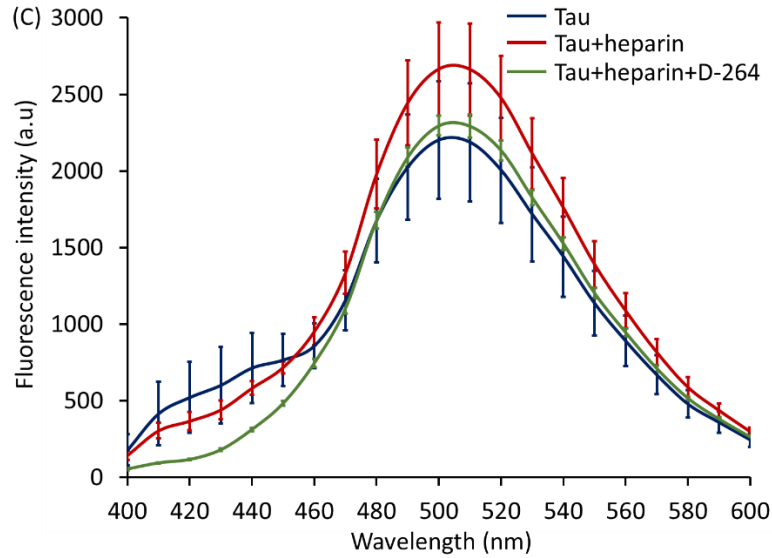

**Figure S73.** Average fluorescence emission spectra of Bis-ANS-bound samples after 72 hours of incubation of the samples at 37 °C. Blue) tau protein in buffer, red) aggregated tau with heparin in buffer, green) aggregated tau with heparin in the presence of D-264 (final concentration 120  $\mu$ M).  $\lambda_{Ex}$ = 350 nm,  $\lambda_{Em}$ = 400-600 nm.

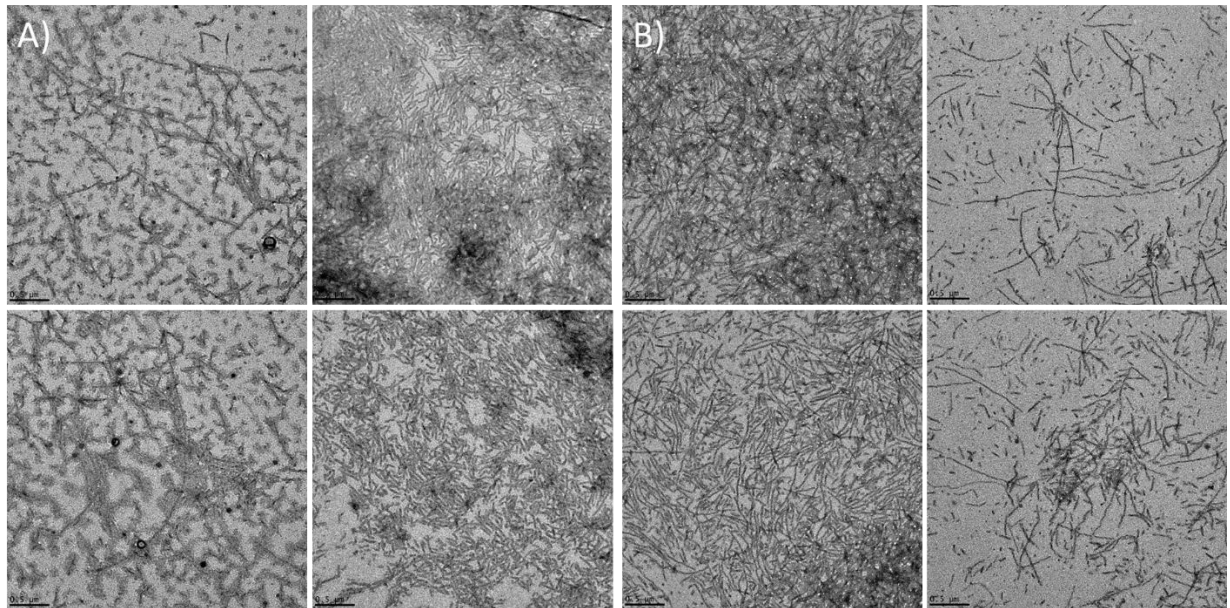

**Figure S74.** TEM images of tau protein samples incubated for 72 hours at 37 °C. A) aggregated tau with heparin, B) aggregated tau with heparin and D-264 (final concentration 120  $\mu$ M). Magnification 22000x, scale bar 500 nm.

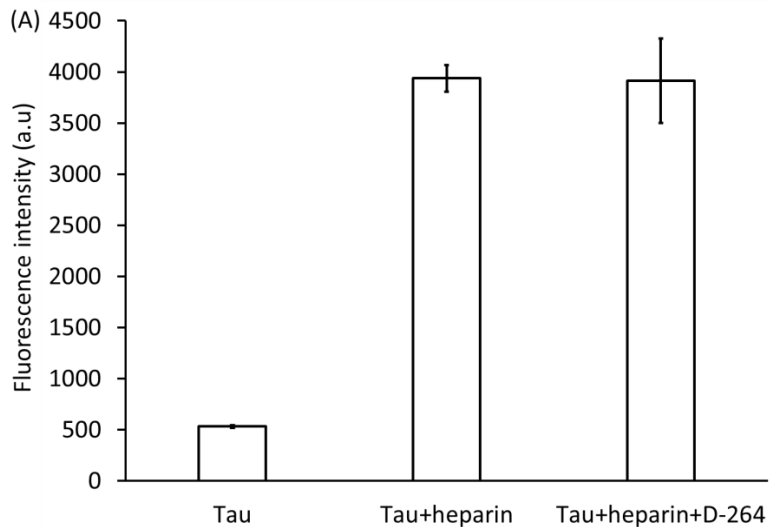

**Figure S75.** Proteostat aggregation assay. A bar graph showing the average fluorescence intensity after 72 hours of incubation of the samples at 37 °C. a) tau protein in buffer, b) aggregated tau with heparin in buffer, c) aggregated tau with heparin in the presence of D-264 (final concentration 250  $\mu$ M).  $\lambda_{Ex}$ = 550 nm,  $\lambda_{Em}$ = 600 nm.

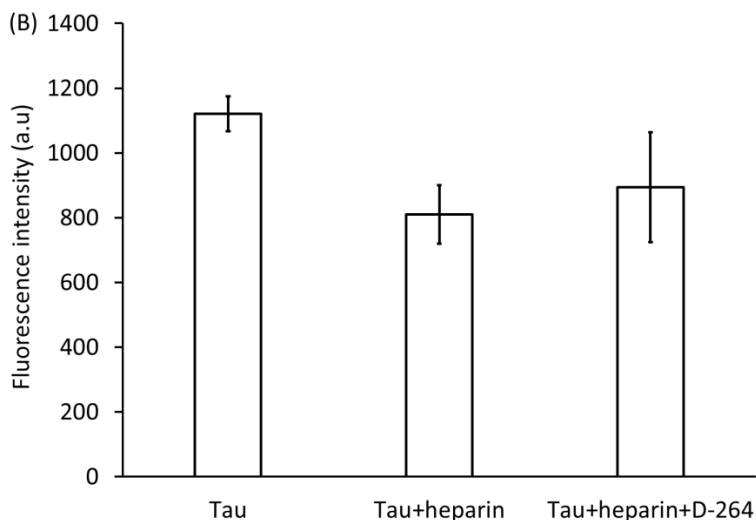

**Figure S76.** Average fluorescence emission spectra of Bis-ANS-bound samples after 72 hours of incubation of the samples at 37 °C. a) tau protein in buffer, b) aggregated tau with heparin in buffer, c) aggregated tau with heparin in the presence of D-264 (final concentration 250  $\mu$ M).  $\lambda_{Ex}$ = 350 nm,  $\lambda_{Em}$ = 510 nm.

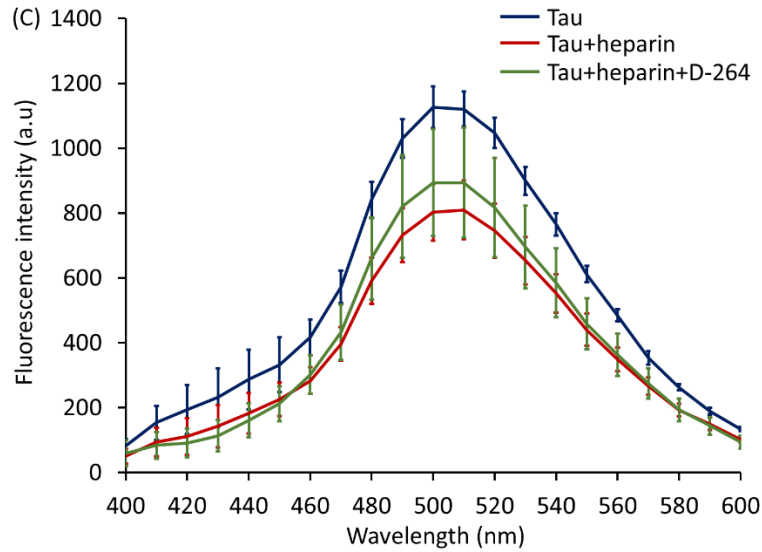

**Figure S77.** Average fluorescence emission spectra of Bis-ANS-bound samples after 72 hours of incubation of the samples at 37 °C. Blue) tau protein in buffer, red) aggregated tau with heparin in buffer, green) aggregated tau with heparin in the presence of D-264 (final concentration 250  $\mu$ M).  $\lambda_{Ex}$ = 350 nm,  $\lambda_{Em}$ = 400-600 nm.

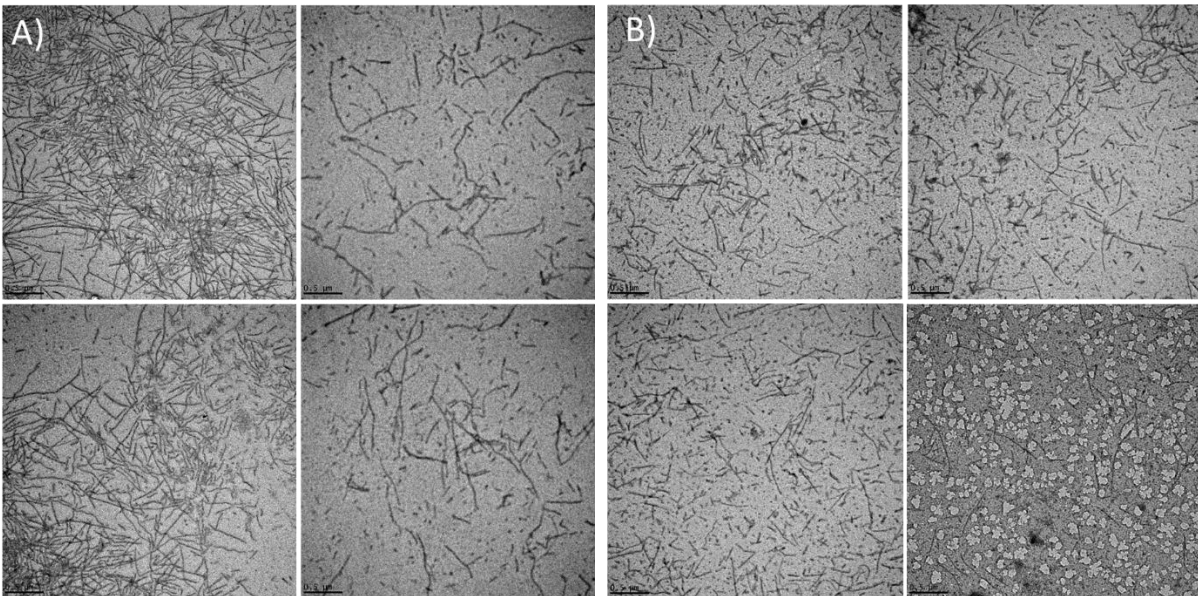

**Figure S78.** TEM images of tau protein samples incubated for 72 hours at 37 °C. A) aggregated tau with heparin, B) aggregated tau with heparin and D-264 (final concentration 250  $\mu$ M). Magnification 22000x, scale bar 500 nm.

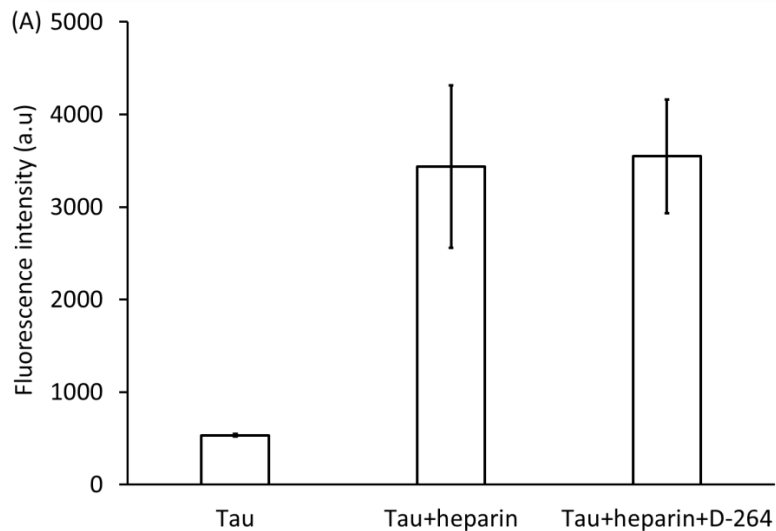

**Figure S79.** Proteostat aggregation assay. A bar graph showing the average fluorescence intensity after 144 hours of incubation of the samples at 37 °C. a) tau protein in buffer, b) aggregated tau with heparin in buffer, c) pre-aggregated tau with heparin for 72 hours, then incubated in the presence of D-264 (final concentration 120  $\mu$ M) for 72 more hours.  $\lambda_{Ex}$ = 550 nm,  $\lambda_{Em}$ = 600 nm.

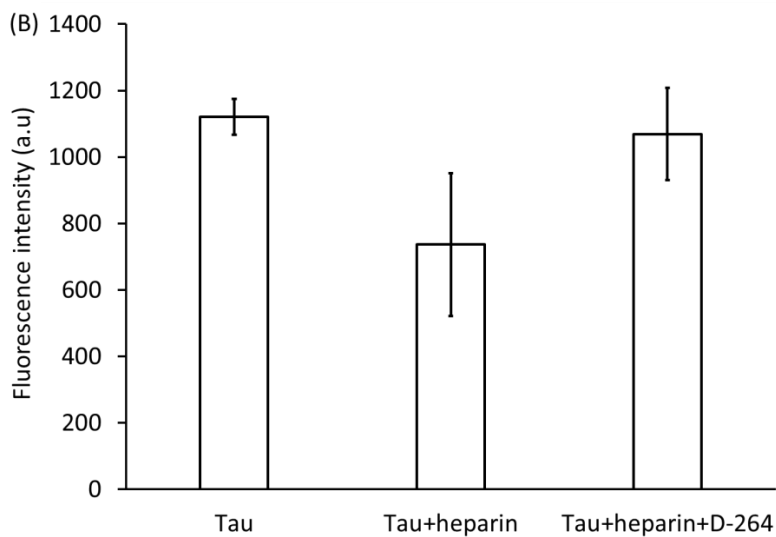

**Figure S80.** Average fluorescence emission spectra of Bis-ANS-bound samples after 144 hours of incubation of the samples at 37 °C. a) tau protein in buffer, b) aggregated tau with heparin in buffer, c) pre-aggregated tau with heparin for 72 hours, then incubated in the presence of D-264 (final concentration 120  $\mu$ M) for 72 more hours.  $\lambda_{Ex}$ = 350 nm,  $\lambda_{Em}$ = 510 nm.



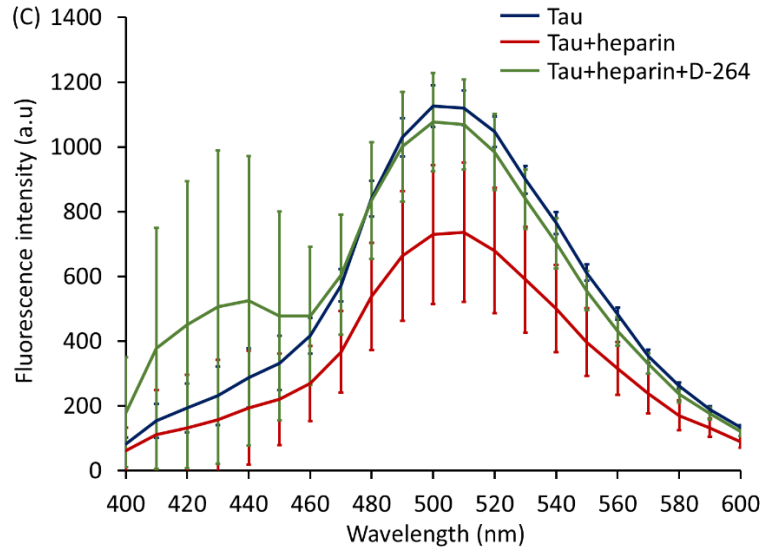

**Figure S81.** Average fluorescence emission spectra of Bis-ANS-bound samples after 144 hours of incubation of the samples at 37 °C. Blue) tau protein in buffer, red) aggregated tau with heparin in buffer, green) pre-aggregated tau with heparin for 72 hours, then incubated in the presence of D-264 (final concentration 120  $\mu$ M) for 72 more hours.  $\lambda_{Ex}$ = 350 nm,  $\lambda_{Em}$ = 400-600 nm.

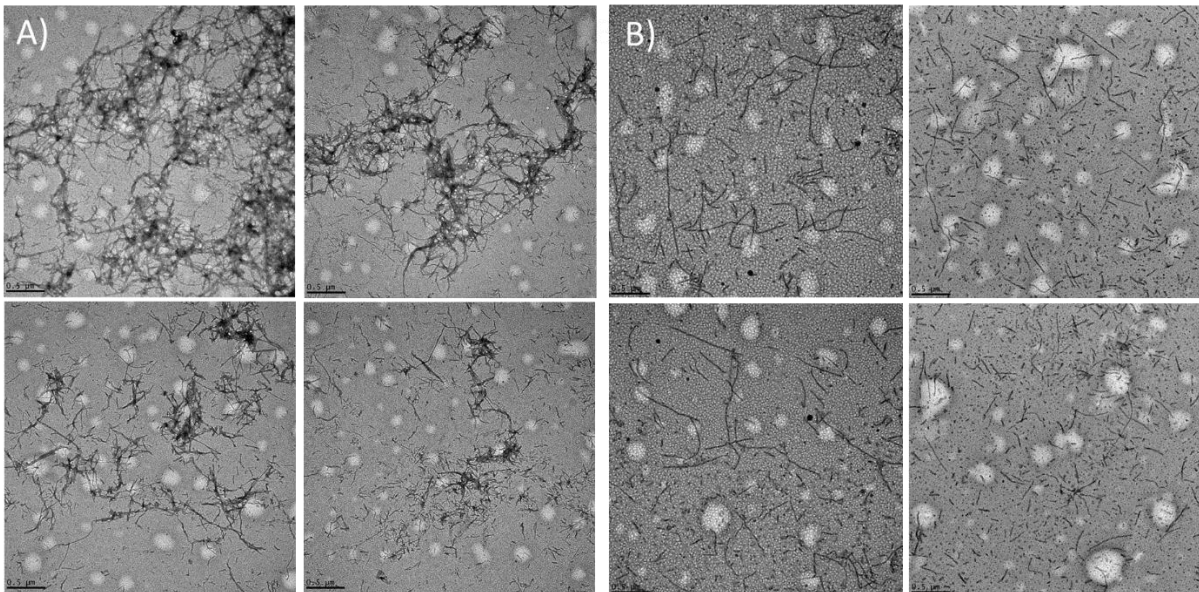

**Figure S82.** TEM images of tau protein samples incubated for 144 hours at 37 °C. A) aggregated tau with heparin, B) pre-aggregated tau with heparin for 72 hours, then incubated with D-264 (final concentration 120  $\mu$ M) for 72 more hours. Magnification 22000x, scale bar 500 nm.

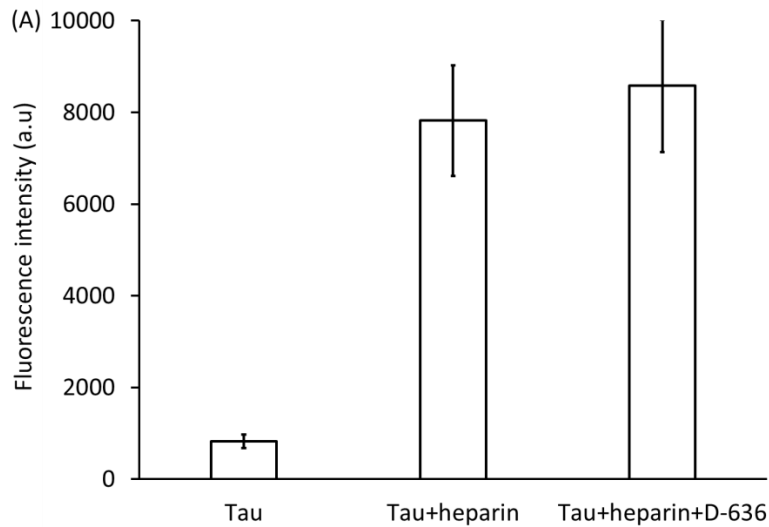

**Figure S83.** Proteostat aggregation assay. A bar graph showing the average fluorescence intensity after 72 hours of incubation of the samples at 37 °C. a) tau protein in buffer, b) aggregated tau with heparin in buffer, c) aggregated tau with heparin in the presence of D-636 (final concentration 5  $\mu$ M).  $\lambda_{Ex}$ = 550 nm,  $\lambda_{Em}$ = 600 nm.

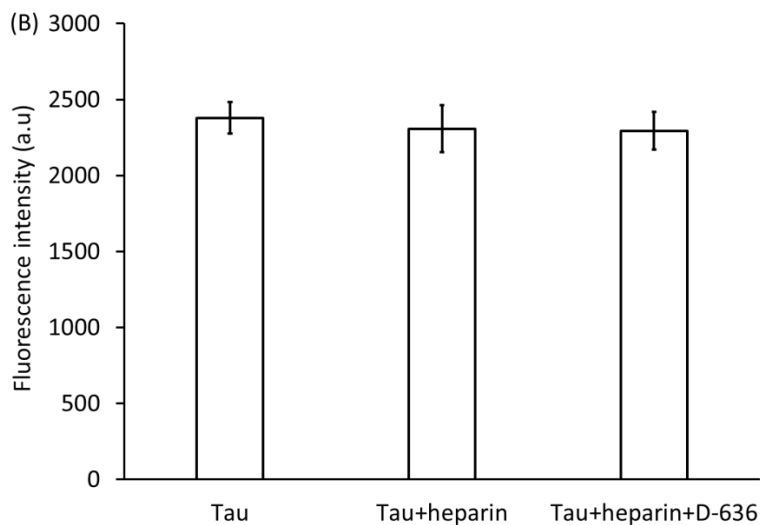

**Figure S84.** Average fluorescence emission spectra of Bis-ANS-bound samples after 72 hours of incubation of the samples at 37 °C. a) tau protein in buffer, b) aggregated tau with heparin in buffer, c) aggregated tau with heparin in the presence of D-636 (final concentration 5  $\mu$ M).  $\lambda_{Ex}$ = 350 nm,  $\lambda_{Em}$ = 510 nm.

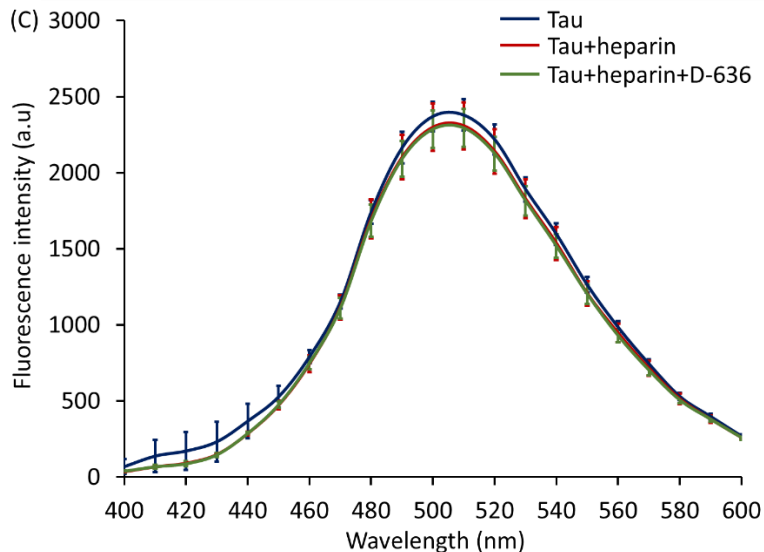

**Figure S85.** Average fluorescence emission spectra of Bis-ANS-bound samples after 72 hours of incubation of the samples at 37 °C. Blue) tau protein in buffer, red) aggregated tau with heparin in buffer, green) aggregated tau with heparin in the presence of D-636 (final concentration 5  $\mu$ M).  $\lambda_{Ex}$ = 350 nm,  $\lambda_{Em}$ = 400-600 nm.

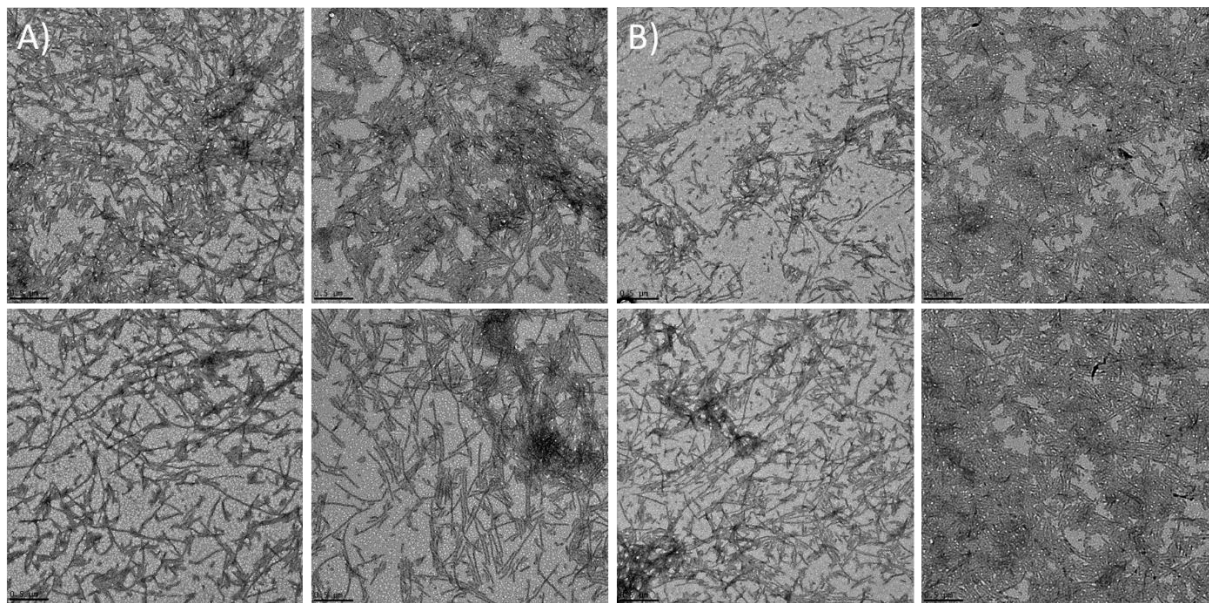

**Figure S86.** TEM images of tau protein samples incubated for 72 hours at 37 °C. A) aggregated tau with heparin, B) aggregated tau with heparin and D-636 (final concentration 5  $\mu$ M). Magnification 22000x, scale bar 500 nm.

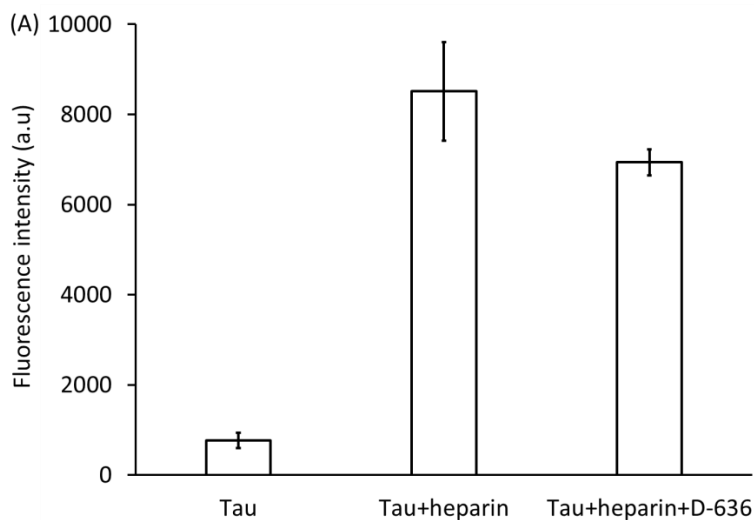

**Figure S7.** Proteostat aggregation assay. A bar graph showing the average fluorescence intensity after 72 hours of incubation of the samples at 37 °C. a) tau protein in buffer, b) aggregated tau with heparin in buffer, c) aggregated tau with heparin in the presence of D-636 (final concentration 40  $\mu$ M).  $\lambda_{Ex}$  = 550 nm,  $\lambda_{Em}$  = 600 nm.

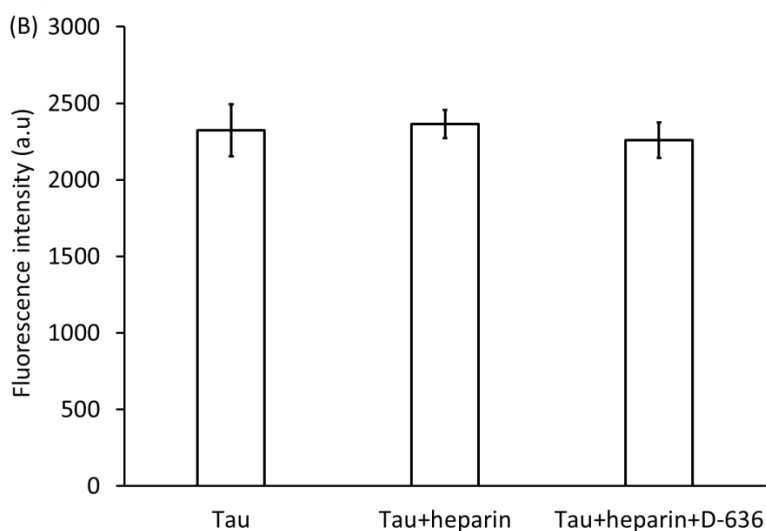

**Figure S88.** Average fluorescence emission spectra of Bis-ANS-bound samples after 72 hours of incubation of the samples at 37 °C. a) tau protein in buffer, b) aggregated tau with heparin in buffer, c) aggregated tau with heparin in the presence of D-636 (final concentration 40  $\mu$ M).  $\lambda_{Ex}$  = 350 nm,  $\lambda_{Em}$  = 510 nm.



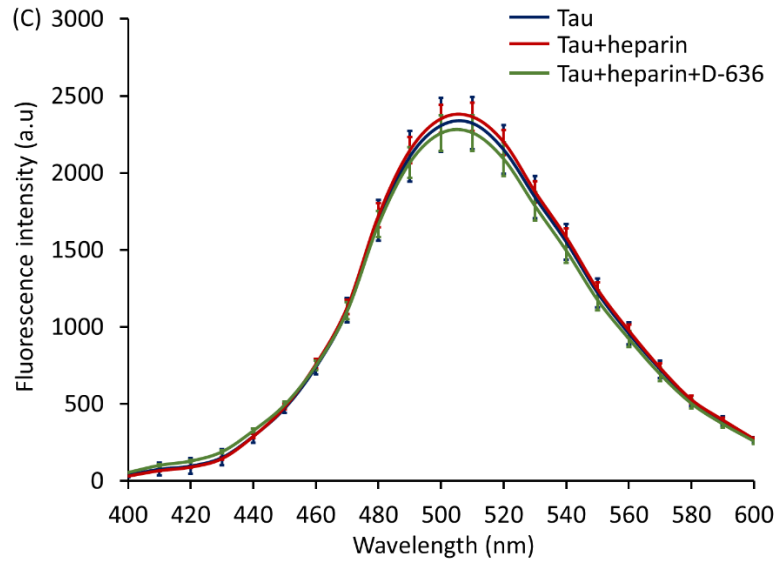

**Figure S89.** Average fluorescence emission spectra of Bis-ANS-bound samples after 72 hours of incubation of the samples at 37 °C. Blue) tau protein in buffer, red) aggregated tau with heparin in buffer, green) aggregated tau with heparin in the presence of D-636 (final concentration 40  $\mu$ M).  $\lambda_{Ex}$ = 350 nm,  $\lambda_{Em}$ = 400-600 nm.

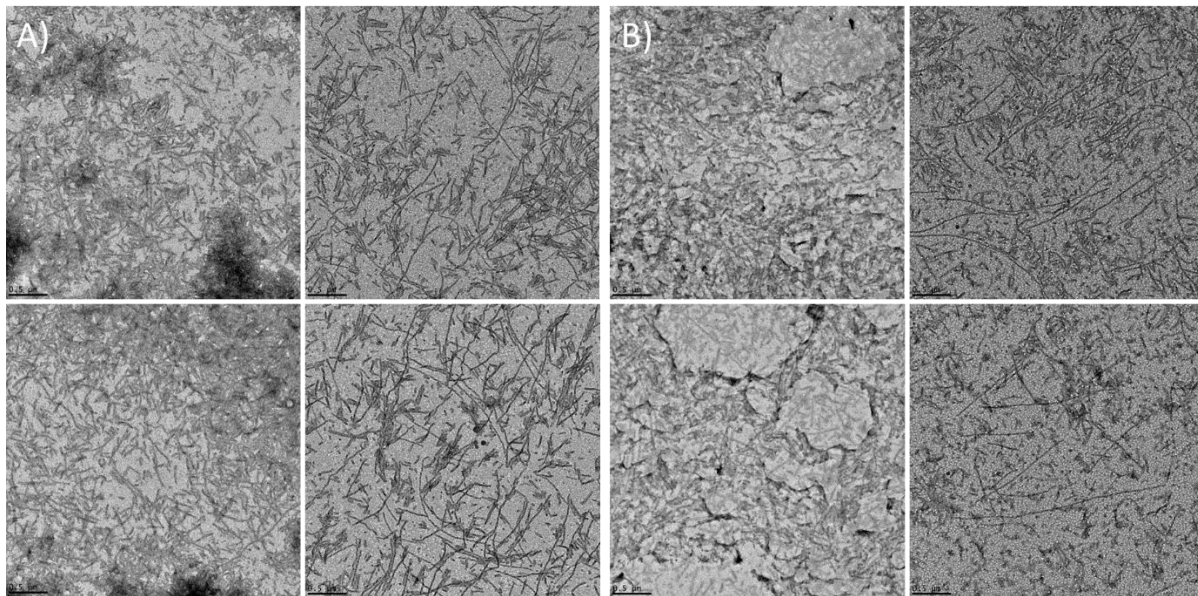

**Figure S90.** TEM images of tau protein samples incubated for 72 hours at 37 °C. A) aggregated tau with heparin, B) aggregated tau with heparin and D-636 (final concentration 40  $\mu$ M). Magnification 22000x, scale bar 500 nm.



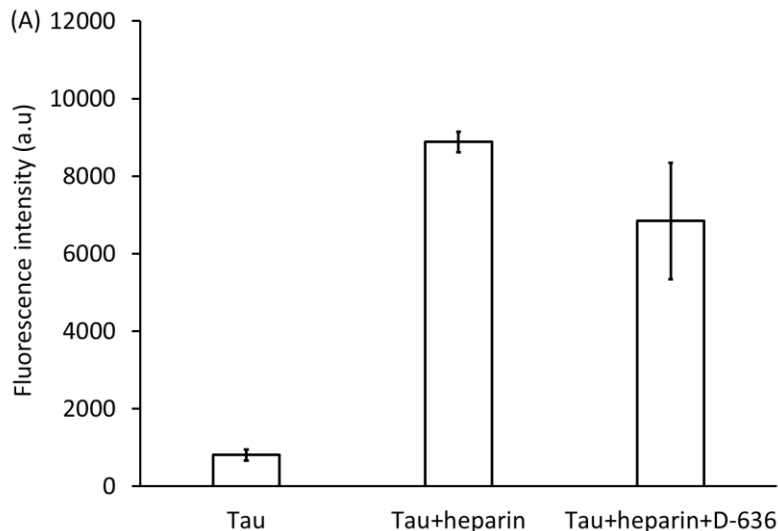

**Figure S91.** Proteostat aggregation assay. A bar graph showing the average fluorescence intensity after 72 hours of incubation of the samples at 37 °C. a) tau protein in buffer, b) aggregated tau with heparin in buffer, c) aggregated tau with heparin in the presence of D-636 (final concentration 120  $\mu$ M).  $\lambda_{Ex}$ = 550 nm,  $\lambda_{Em}$ = 600 nm.

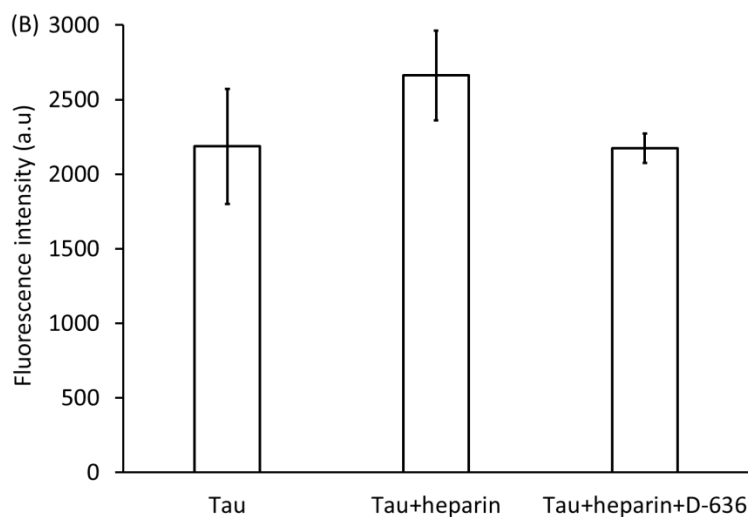

**Figure S92.** Average fluorescence emission spectra of Bis-ANS-bound samples after 72 hours of incubation of the samples at 37 °C. a) tau protein in buffer, b) aggregated tau with heparin in buffer, c) aggregated tau with heparin in the presence of D-636 (final concentration 120  $\mu$ M).  $\lambda_{Ex}$ = 350 nm,  $\lambda_{Em}$ = 510 nm.

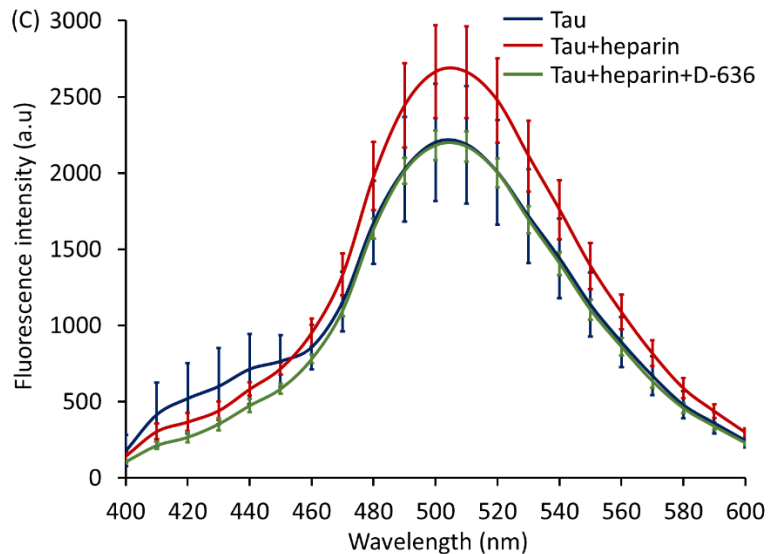

**Figure S93.** Average fluorescence emission spectra of Bis-ANS-bound samples after 72 hours of incubation of the samples at 37 °C. Blue) tau protein in buffer, red) aggregated tau with heparin in buffer, green) aggregated tau with heparin in the presence of D-636 (final concentration 120  $\mu$ M).  $\lambda_{Ex}$ = 350 nm,  $\lambda_{Em}$ = 400-600 nm.

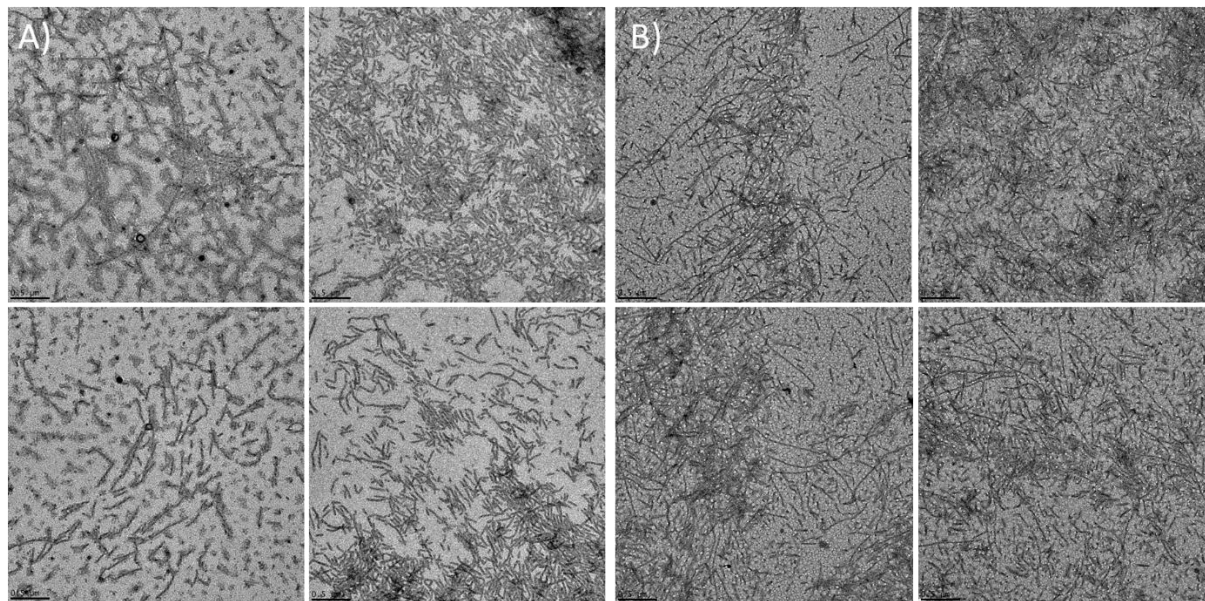

**Figure S94.** TEM images of tau protein samples incubated for 72 hours at 37 °C. A) aggregated tau with heparin, B) aggregated tau with heparin and D-636 (final concentration 120  $\mu$ M). Magnification 22000x, scale bar 500 nm.

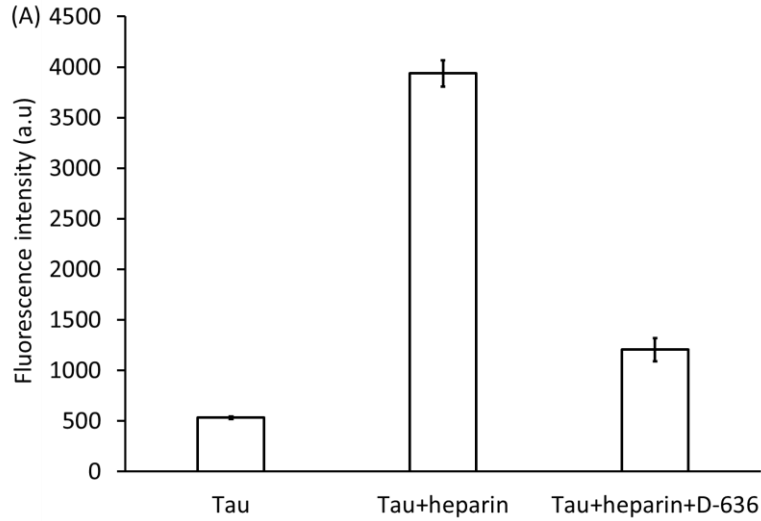

**Figure S95.** Proteostat aggregation assay. A bar graph showing the average fluorescence intensity after 72 hours of incubation of the samples at 37 °C. a) tau protein in buffer, b) aggregated tau with heparin in buffer, c) aggregated tau with heparin in the presence of D-636 (final concentration 250  $\mu$ M).  $\lambda_{Ex}$ = 550 nm,  $\lambda_{Em}$ = 600 nm.

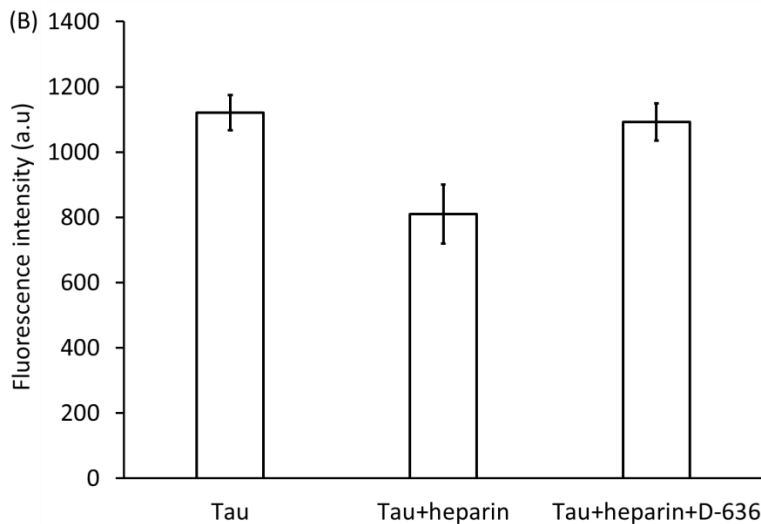

**Figure S96.** Average fluorescence emission spectra of Bis-ANS-bound samples after 72 hours of incubation of the samples at 37 °C. a) tau protein in buffer, b) aggregated tau with heparin in buffer, c) aggregated tau with heparin in the presence of D-636 (final concentration 250  $\mu$ M).  $\lambda_{Ex}$ = 350 nm,  $\lambda_{Em}$ = 510 nm.

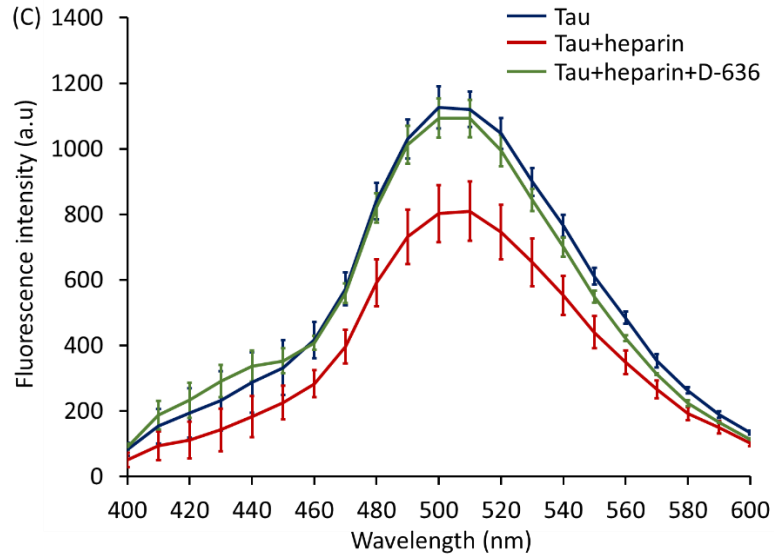

**Figure S97.** Average fluorescence emission spectra of Bis-ANS-bound samples after 72 hours of incubation of the samples at 37 °C. Blue) tau protein in buffer, red) aggregated tau with heparin in buffer, green) aggregated tau with heparin in the presence of D-636 (final concentration 250  $\mu$ M).  $\lambda_{Ex}$ = 350 nm,  $\lambda_{Em}$ = 400-600 nm.

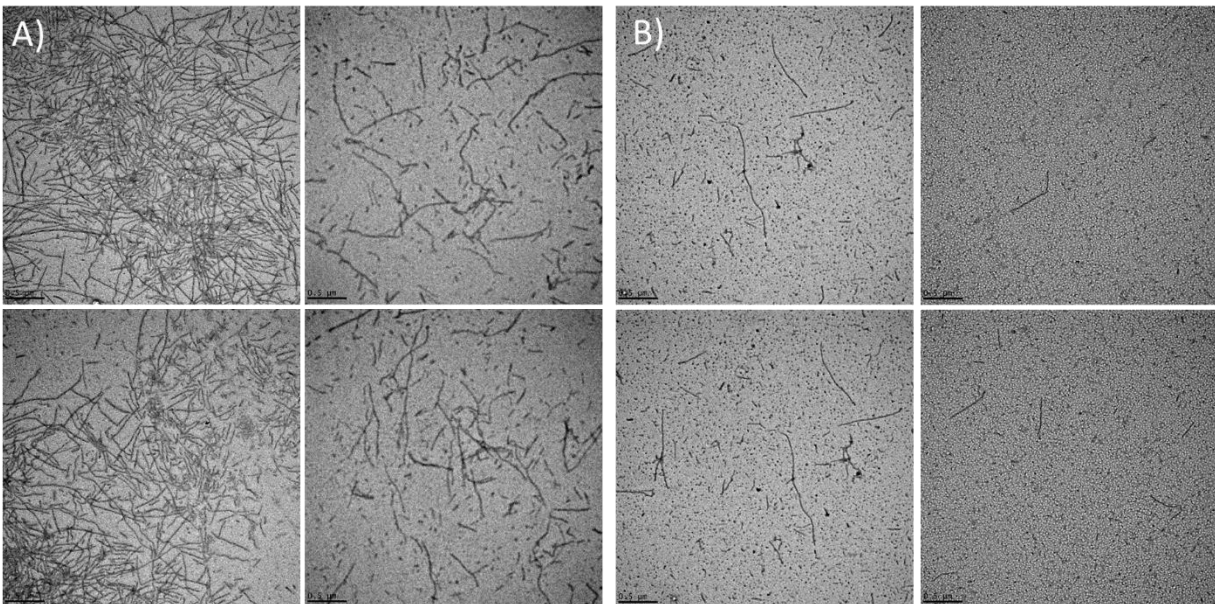

**Figure S98.** TEM images of tau protein samples incubated for 72 hours at 37 °C. A) aggregated tau with heparin, B) aggregated tau with heparin and D-636 (final concentration 250  $\mu$ M). Magnification 22000x, scale bar 500 nm.

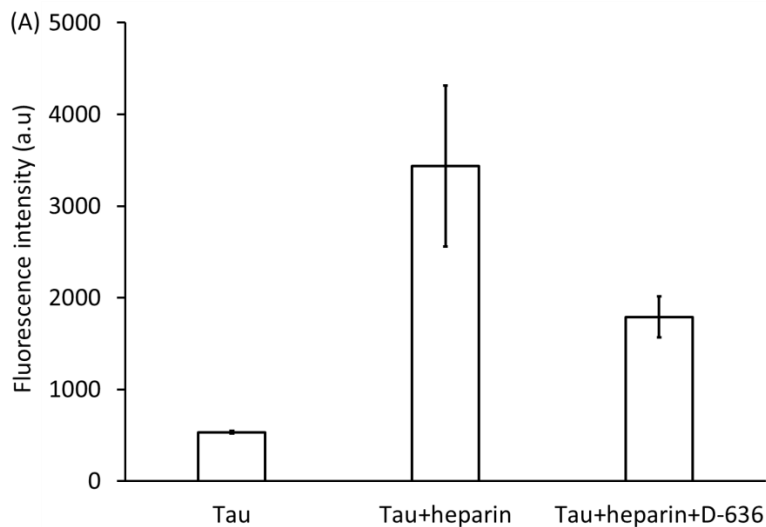

**Figure S99.** Proteostat aggregation assay. A bar graph showing the average fluorescence intensity after 144 hours of incubation of the samples at 37 °C. a) tau protein in buffer, b) aggregated tau with heparin in buffer, c) pre-aggregated tau with heparin for 72 hours, then incubated in the presence of D-636 (final concentration 120  $\mu$ M) for 72 more hours.  $\lambda_{Ex}$ = 550 nm,  $\lambda_{Em}$ = 600 nm.

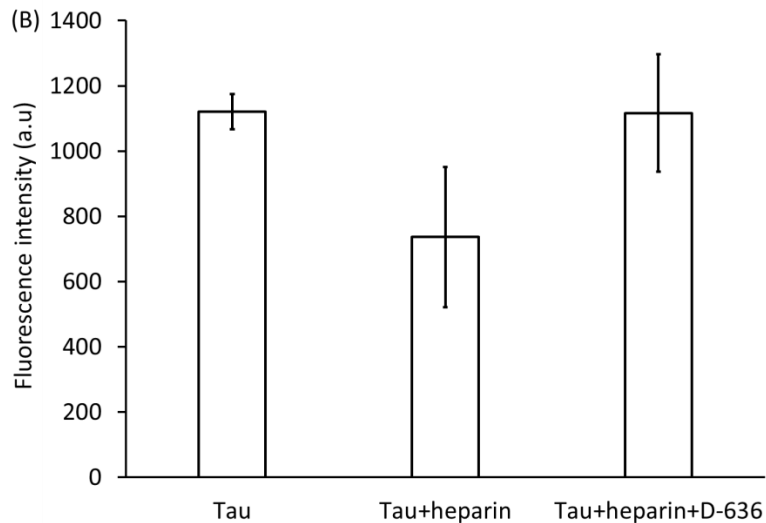

**Figure S100.** Average fluorescence emission spectra of Bis-ANS-bound samples after 144 hours of incubation of the samples at 37 °C. a) tau protein in buffer, b) aggregated tau with heparin in buffer, c) pre-aggregated tau with heparin for 72 hours, then incubated in the presence of D-636 (final concentration 120  $\mu$ M) for 72 more hours.  $\lambda_{Ex}$ = 350 nm,  $\lambda_{Em}$ = 510 nm.



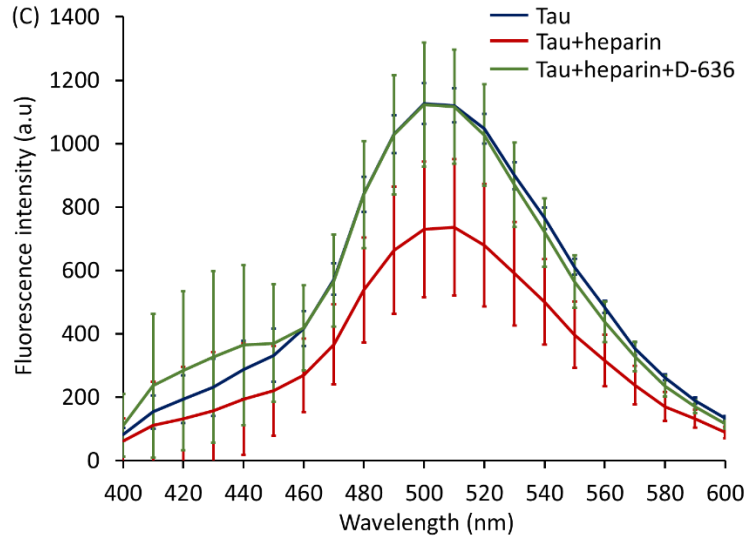

**Figure S101.** Average fluorescence emission spectra of Bis-ANS-bound samples after 144 hours of incubation of the samples at 37 °C. Blue) tau protein in buffer, red) aggregated tau with heparin in buffer, green) pre-aggregated tau with heparin for 72 hours, then incubated in the presence of D-636 (final concentration 120  $\mu$ M) for 72 more hours.  $\lambda_{Ex}$ = 350 nm,  $\lambda_{Em}$ = 400-600 nm.

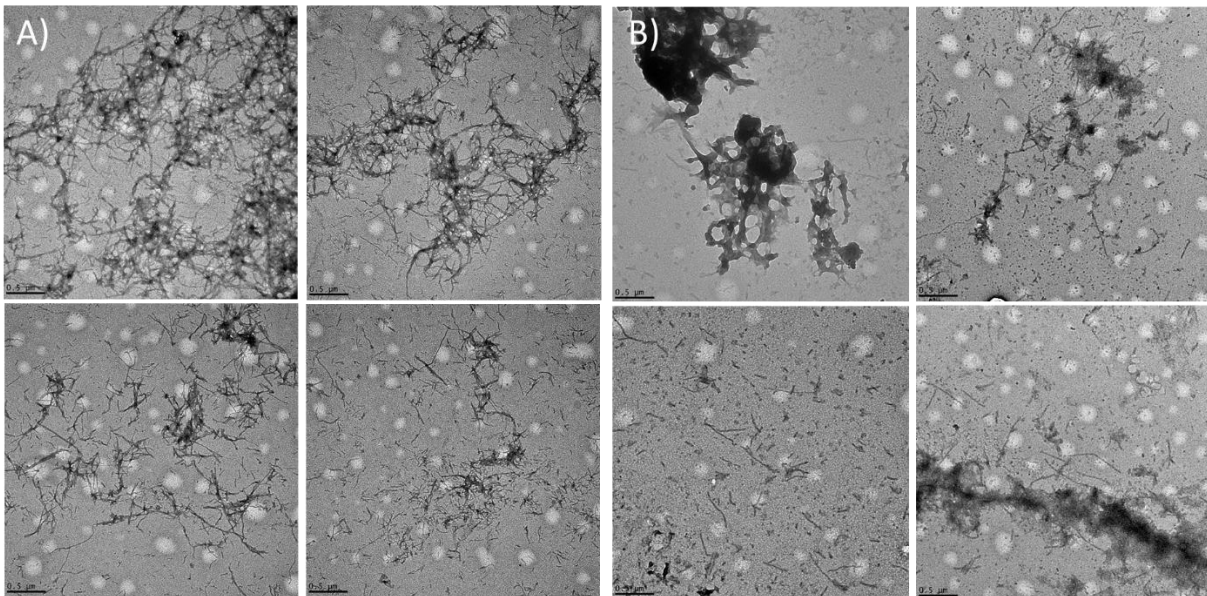

**Figure S102.** TEM images of tau protein samples incubated for 144 hours at 37 °C. A) aggregated tau with heparin, B) pre-aggregated tau with heparin for 72 hours, then incubated with D-636 (final concentration 120  $\mu$ M) for 72 more hours. Magnification 22000x, scale bar 500 nm.

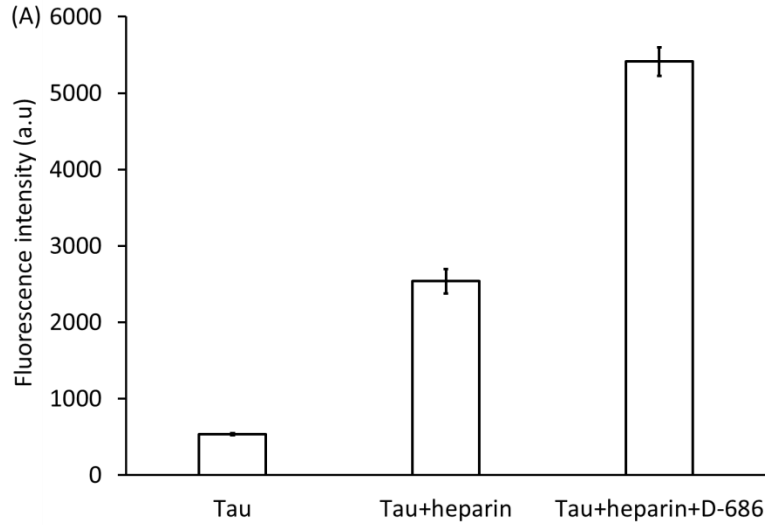

**Figure S103.** Proteostat aggregation assay. A bar graph showing the average fluorescence intensity after 72 hours of incubation of the samples at 37 °C. a) tau protein in buffer, b) aggregated tau with heparin in buffer, c) aggregated tau with heparin in the presence of D-686 (final concentration 120  $\mu$ M).  $\lambda_{Ex}$ = 550 nm,  $\lambda_{Em}$ = 600 nm.

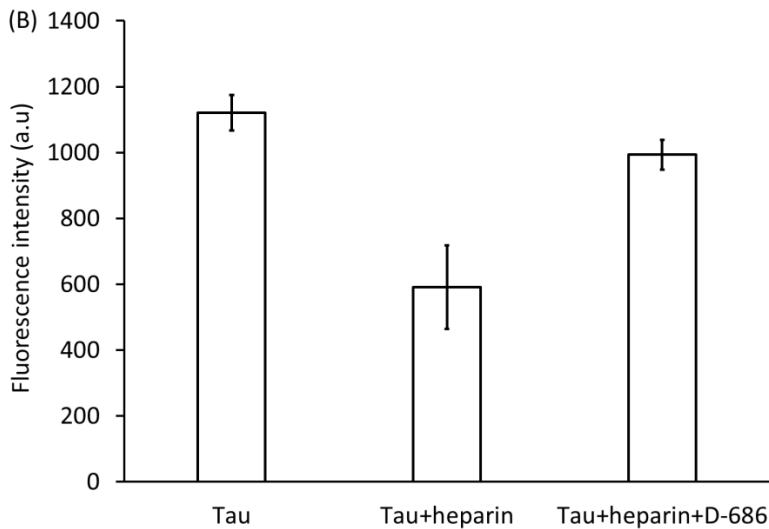

**Figure S104.** Average fluorescence emission spectra of Bis-ANS-bound samples after 72 hours of incubation of the samples at 37 °C. a) tau protein in buffer, b) aggregated tau with heparin in buffer, c) aggregated tau with heparin in the presence of D-686 (final concentration 120  $\mu$ M).  $\lambda_{Ex}$ = 350 nm,  $\lambda_{Em}$ = 510 nm.

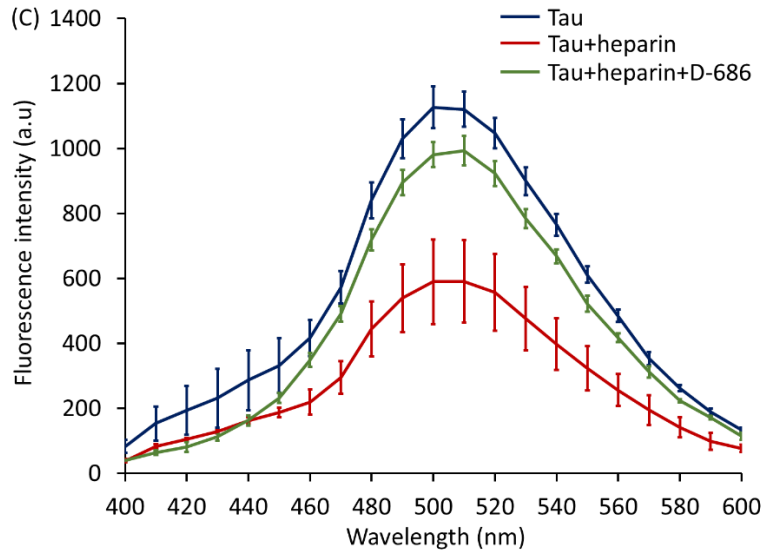

**Figure S105.** Average fluorescence emission spectra of Bis-ANS-bound samples after 72 hours of incubation of the samples at 37 °C. Blue) tau protein in buffer, red) aggregated tau with heparin in buffer, green) aggregated tau with heparin in the presence of D-686 (final concentration 120  $\mu$ M).  $\lambda_{Ex}$ = 350 nm,  $\lambda_{Em}$ = 400-600 nm.

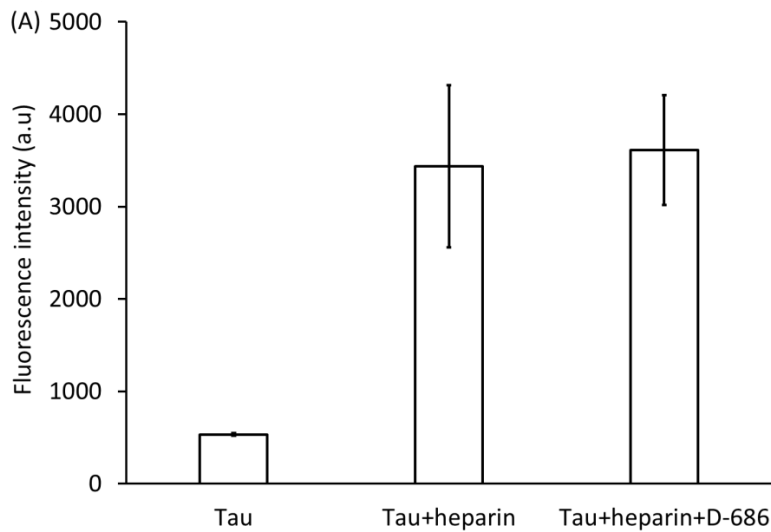

**Figure S106.** Proteostat aggregation assay. A bar graph showing the average fluorescence intensity after 144 hours of incubation of the samples at 37 °C. a) tau protein in buffer, b) aggregated tau with heparin in buffer, c) pre-aggregated tau with heparin for 72 hours, then incubated in the presence of D-686 (final concentration 120  $\mu$ M) for 72 more hours.  $\lambda_{Ex}$ = 550 nm,  $\lambda_{Em}$ = 600 nm.

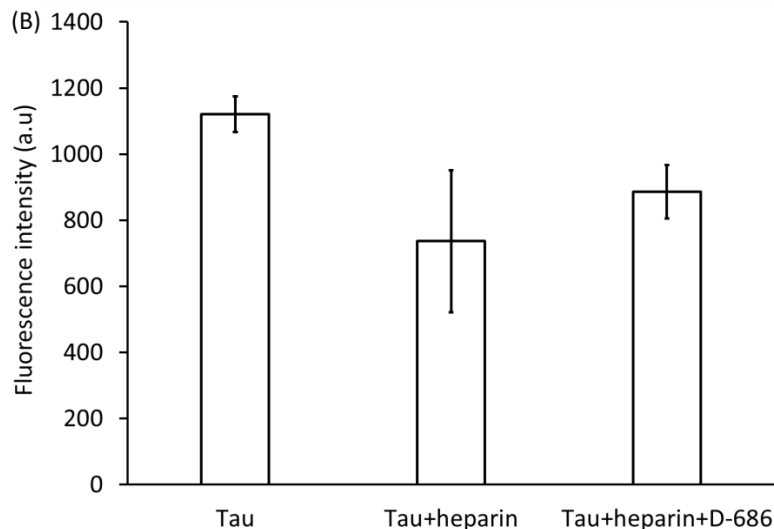

**Figure S107.** Average fluorescence emission spectra of Bis-ANS-bound samples after 144 hours of incubation of the samples at 37 °C. a) tau protein in buffer, b) aggregated tau with heparin in buffer, c) pre-aggregated tau with heparin for 72 hours, then incubated in the presence of D-686 (final concentration 120  $\mu$ M) for 72 more hours.  $\lambda_{Ex}$ = 350 nm,  $\lambda_{Em}$ = 510 nm.

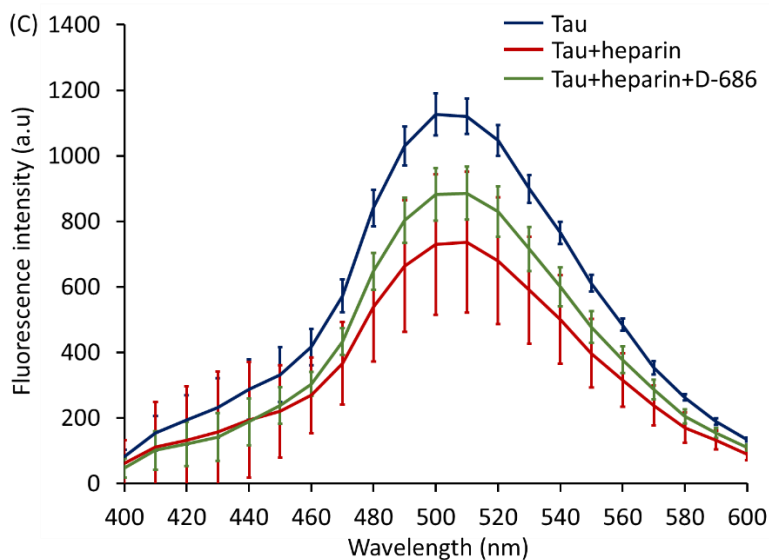

**Figure S108.** Average fluorescence emission spectra of Bis-ANS-bound samples after 144 hours of incubation of the samples at 37 °C. Blue) tau protein in buffer, red) aggregated tau with heparin in buffer, green) pre-aggregated tau with heparin for 72 hours, then incubated in the presence of D-686 (final concentration 120  $\mu$ M) for 72 more hours.  $\lambda_{Ex}$ = 350 nm,  $\lambda_{Em}$ = 400-600 nm.

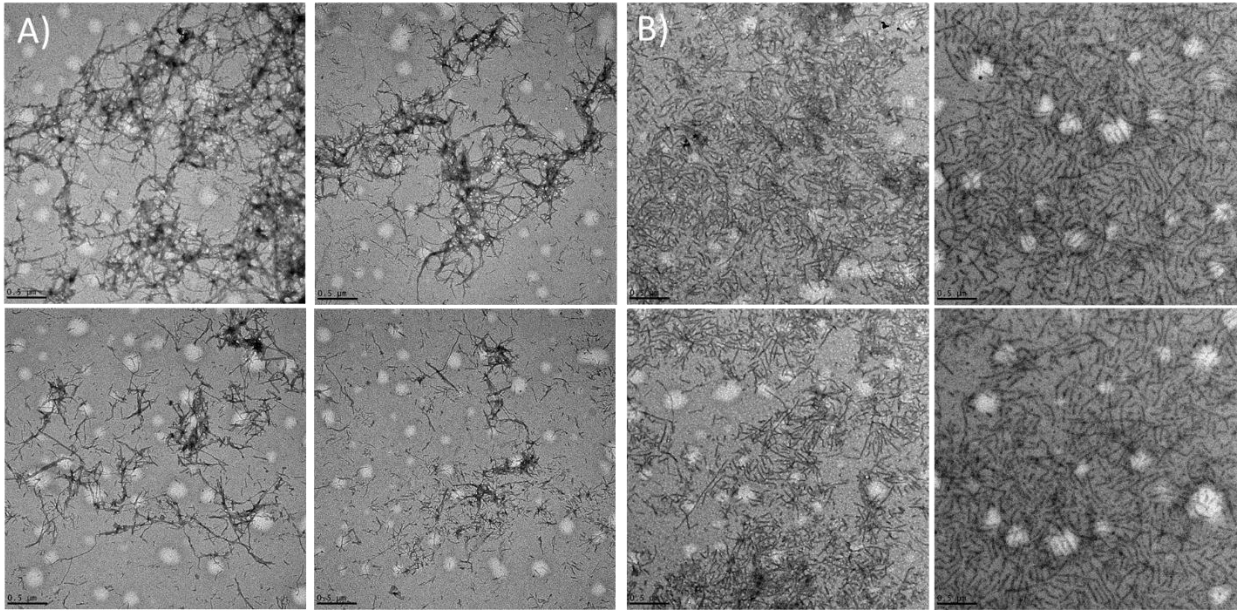

**Figure S109.** TEM images of tau protein samples incubated for 144 hours at 37 °C. A) aggregated tau with heparin, B) pre-aggregated tau with heparin for 72 hours, then incubated with D-686 (final concentration 120  $\mu$ M) for 72 more hours. Magnification 22000x, scale bar 500 nm.

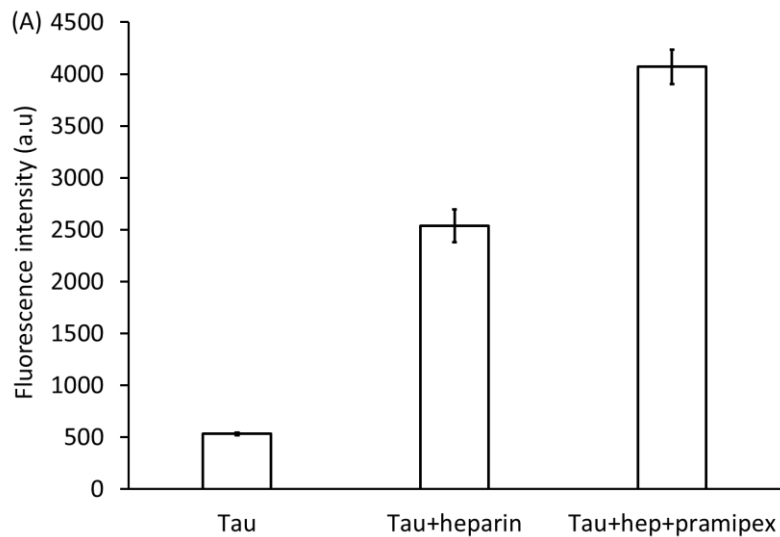

**Figure S110.** Proteostat aggregation assay. A bar graph showing the average fluorescence intensity after 72 hours of incubation of the samples at 37 °C. a) tau protein in buffer, b) aggregated tau with heparin in buffer, c) aggregated tau with heparin in the presence of Pramipexole (final concentration 120  $\mu$ M).  $\lambda_{Ex}$ = 550 nm,  $\lambda_{Em}$ = 600 nm.



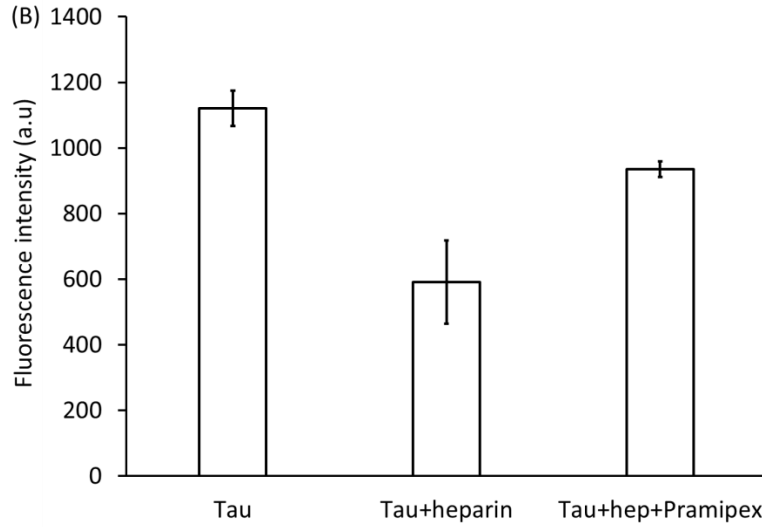

**Figure S111.** Average fluorescence emission spectra of Bis-ANS-bound samples after 72 hours of incubation of the samples at 37 °C. a) tau protein in buffer, b) aggregated tau with heparin in buffer, c) aggregated tau with heparin in the presence of Pramipexole (final concentration 120  $\mu$ M).  $\lambda_{Ex}$ = 350 nm,  $\lambda_{Em}$ = 510 nm.

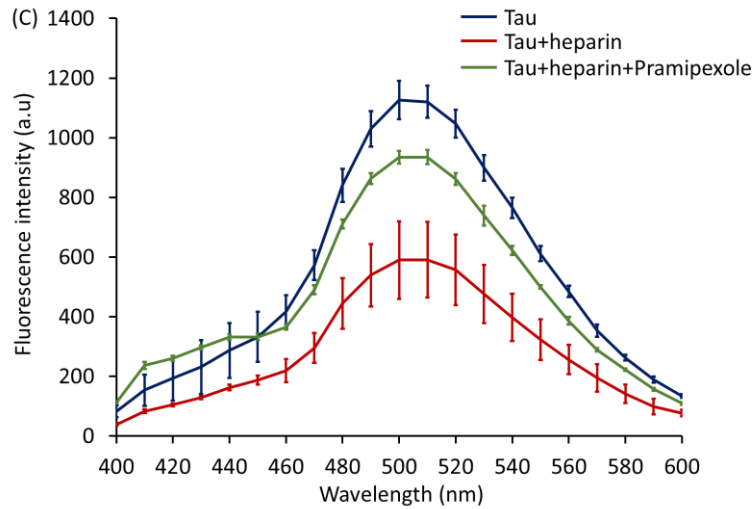

**Figure S112.** Average fluorescence emission spectra of Bis-ANS-bound samples after 72 hours of incubation of the samples at 37 °C. Blue) tau protein in buffer, red) aggregated tau with heparin in buffer, green) aggregated tau with heparin in the presence of Pramipexole (final concentration 120  $\mu$ M).  $\lambda_{Ex}$ = 350 nm,  $\lambda_{Em}$ = 400-600 nm.

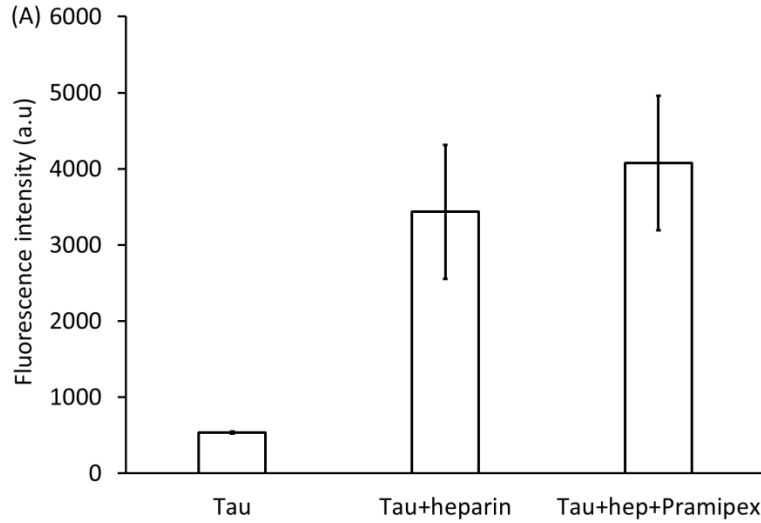

**Figure S113.** Proteostat aggregation assay. A bar graph showing the average fluorescence intensity after 144 hours of incubation of the samples at 37 °C. a) tau protein in buffer, b) aggregated tau with heparin in buffer, c) pre-aggregated tau with heparin for 72 hours, then incubated in the presence of Pramipexole (final concentration 120  $\mu$ M) for 72 more hours.  $\lambda_{Ex}$ = 550 nm,  $\lambda_{Em}$ = 600 nm.

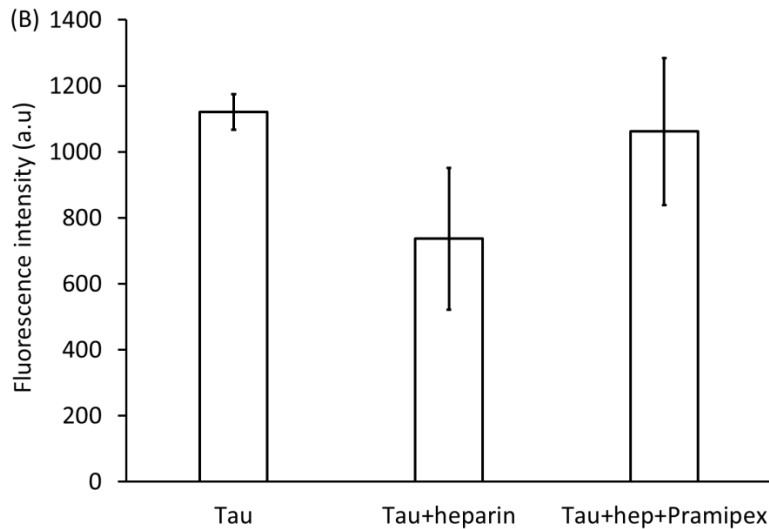

**Figure S114.** Average fluorescence emission spectra of Bis-ANS-bound samples after 144 hours of incubation of the samples at 37 °C. a) tau protein in buffer, b) aggregated tau with heparin in buffer, c) pre-aggregated tau with heparin for 72 hours, then incubated in the presence of Pramipexole (final concentration 120  $\mu$ M) for 72 more hours.  $\lambda_{Ex}$ = 350 nm,  $\lambda_{Em}$ = 510 nm.

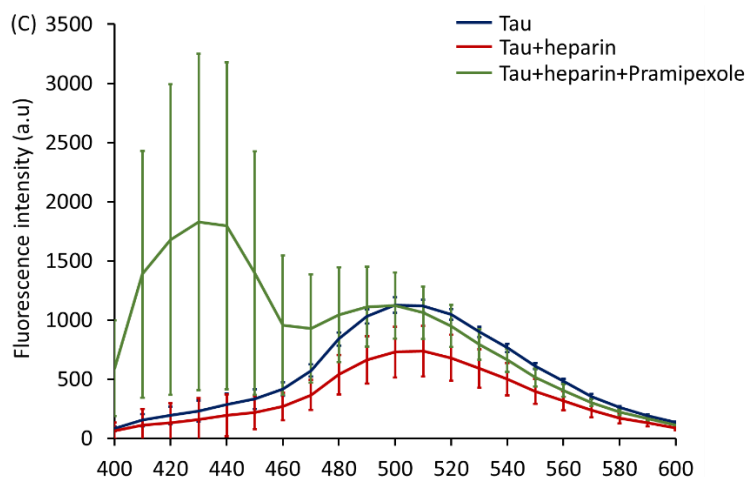

**Figure S115.** Average fluorescence emission spectra of Bis-ANS-bound samples after 144 hours of incubation of the samples at 37 °C. Blue) tau protein in buffer, red) aggregated tau with heparin in buffer, green) pre-aggregated tau with heparin for 72 hours, then incubated in the presence of Pramipexole (final concentration 120  $\mu$ M) for 72 more hours.  $\lambda_{Ex}$ = 350 nm,  $\lambda_{Em}$ = 400-600 nm.

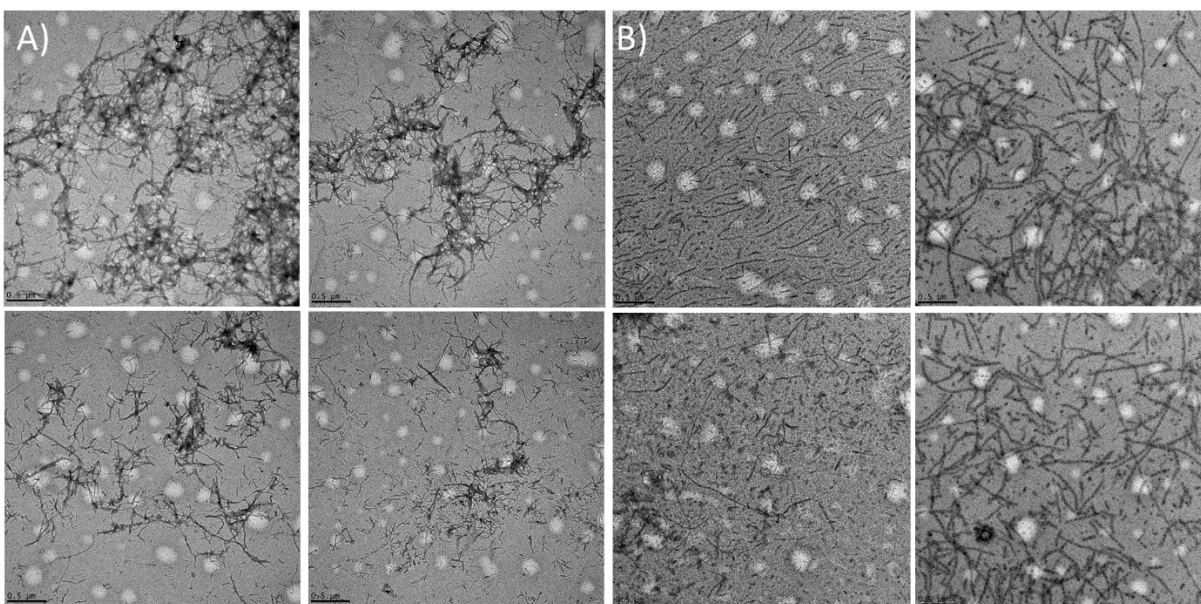

**Figure S116.** TEM images of tau protein samples incubated for 144 hours at 37 °C. A) aggregated tau with heparin, B) pre-aggregated tau with heparin for 72 hours, then incubated with Pramipexole (final concentration 120  $\mu$ M) for 72 more hours. Magnification 22000x, scale bar 500 nm.

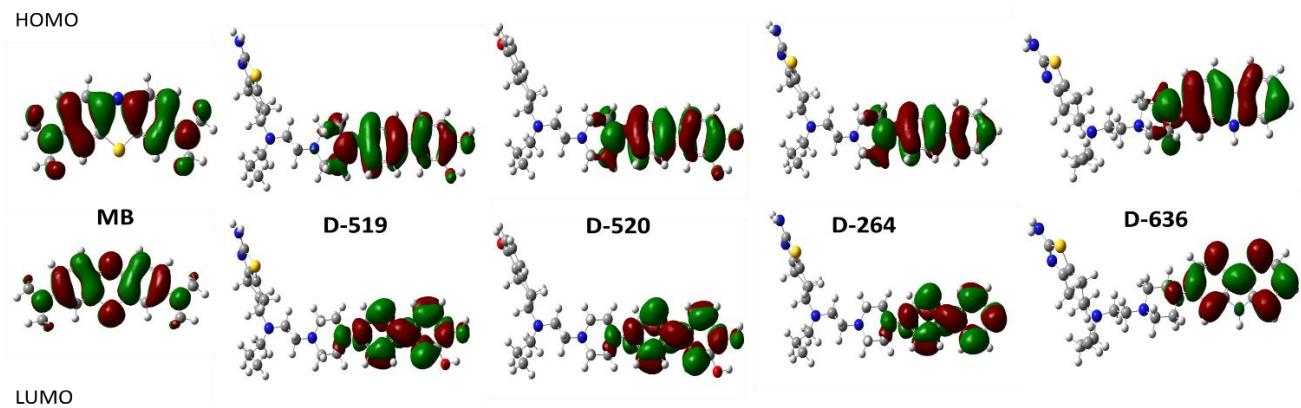

**Figure S117.** Calculated HOMO and LUMO orbitals for all inhibitors tested (carbon, grey; hydrogen, white; nitrogen, blue; oxygen, red; and sulfur, yellow).

**Table S1.** Calculated parameters for all inhibitors.

| <b>Inhibitor</b> | <b>Dipole moment</b><br>(D) | <b>HOMO</b><br>(eV vs. SHE) | <b>LUMO</b><br>(eV vs. SHE) | <b>HOMO-LUMO gap</b><br>(eV vs. SHE) |
|------------------|-----------------------------|-----------------------------|-----------------------------|--------------------------------------|
| <b>MB</b>        | 2.15                        | -8.78                       | -6.32                       | 2.46                                 |
| <b>D-519</b>     | 3.61                        | -4.87                       | -0.25                       | 4.62                                 |
| <b>D-520</b>     | 3.20                        | -5.26                       | -0.65                       | 4.61                                 |
| <b>D-264</b>     | 2.76                        | -5.35                       | -0.82                       | 4.53                                 |
| <b>D-636</b>     | 3.27                        | -5.24                       | -0.82                       | 4.42                                 |

**Table S2.** Calculated parameters for inhibitors with exchangeable protons.

| <b>Inhibitor</b> | $\Delta G_{cal}$ (kcal/mol) | Calculated $pK_a$ |
|------------------|-----------------------------|-------------------|
| <b>D-636 (N)</b> | 0.63                        | 9.54              |
| <b>D-520</b>     |                             |                   |
| <i>para</i>      | 13.72                       | -0.05             |
| <i>meta</i>      | -1.68                       | 11.23             |
| <b>D-519</b>     |                             |                   |
| <i>para</i>      | -1.42                       | 11.04             |
| <i>meta</i>      | 0.63                        | 9.54              |

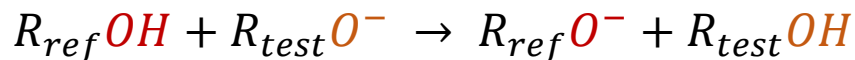

$$(R_{ref}O^- + R_{test}OH) - (R_{ref}OH + R_{test}O^-) = \Delta G_{calc}$$

$$pK_a = \frac{-\Delta G_{calc}}{\ln(10) RT}$$
